# Supplementary material
Source: publisher figshare collection journal article supplement (https://gsajournals.figshare.com/articles/dataset/_/7823846)
Supplement: Supplementary file 1 [file 1]

**Table S3: Exact p-values for Chi-squared test with the Yates correction for comparing the number of genes between genotypes with called H3K9me2 promoter peaks**

|                                          |                        | <b>Genes with H3K9me2 promoter peaks</b> |                        |                       |                       |            |                        |                       |                       |
|------------------------------------------|------------------------|------------------------------------------|------------------------|-----------------------|-----------------------|------------|------------------------|-----------------------|-----------------------|
|                                          |                        | N2<br>20°C                               | <i>lin-15B</i><br>20°C | <i>lin-35</i><br>20°C | <i>lin-37</i><br>20°C | N2<br>26°C | <i>lin-15B</i><br>26°C | <i>lin-35</i><br>26°C | <i>lin-37</i><br>26°C |
| <b>Genes with H3K9me2 promoter peaks</b> | N2<br>20°C             | NA                                       | < 0.0001               | 0.0059                | 0.0040                | ns         | < 0.0001               | ns                    | ns                    |
|                                          | <i>lin-15B</i><br>20°C |                                          | NA                     | < 0.0001              | < 0.0001              | < 0.0001   | < 0.0001               | < 0.0001              | < 0.0001              |
|                                          | <i>lin-35</i><br>20°C  |                                          |                        | NA                    | ns                    | 0.0072     | 0.0008                 | 0.0089                | < 0.0001              |
|                                          | <i>lin-37</i><br>20°C  |                                          |                        |                       | NA                    | 0.0050     | 0.0012                 | 0.0061                | < 0.0001              |
|                                          | N2<br>26°C             |                                          |                        |                       |                       | NA         | < 0.0001               | ns                    | ns                    |
|                                          | <i>lin-15B</i><br>26°C |                                          |                        |                       |                       |            | NA                     | < 0.0001              | < 0.0001              |
|                                          | <i>lin-35</i><br>26°C  |                                          |                        |                       |                       |            |                        | NA                    | ns                    |
|                                          | <i>lin-37</i><br>26°C  |                                          |                        |                       |                       |            |                        |                       | NA                    |

Significance cut-off of p-value  $\leq 0.01$
