# Supplementary material
Source: publisher figshare collection journal article supplement (https://gsajournals.figshare.com/articles/dataset/_/7823846)
Supplement: Supplementary file 1 [file 1]

## Sheet: Key
Column Heading	Definitions and information
Gene.WB.ID	Wormbase gene ID number
Gene.Public.Name	Wormbase gene public name
Gene.Sequence.Name	Wormbase gene sequence name
Chr	Chromosome
Strand	Strand of chromsome
Start	Location of start codon in build XXX
End	Location of end codon in build XXX
Operon	Operon
Chr.Left	Gene location called on the left arm per location in Liu et al. 2010
Chr.Mid	Gene location called on chromsome center per location in Liu et al. 2010
Chr.Right	Gene location called on the right arm per location in Liu et al. 2010
H3K9me2 GB WT 20	Called H3K9me2 gene body peak in wild type at 20°C, peak called in both experimental replicates
H3K9me2 GB WT 26	Called H3K9me2 gene body peak in wild type at 26°C, peak called in both experimental replicates
H3K9me2 GB 15B 20	Called H3K9me2 gene body peak in lin-15B at 20°C, peak called in both experimental replicates
H3K9me2 GB 15B 26	Called H3K9me2 gene body peak in lin-15B at 26°C, peak called in both experimental replicates
H3K9me2 GB 35 20	Called H3K9me2 gene body peak in lin-35 at 20°C, peak called in both experimental replicates
H3K9me2 GB 35 26	Called H3K9me2 gene body peak in lin-35 at 26°C, peak called in both experimental replicates
H3K9me2 GB 37 20	Called H3K9me2 gene body peak in lin-37 at 20°C, peak called in both experimental replicates
H3K9me2 GB 37 26	Called H3K9me2 gene body peak in lin-37at 20°C, peak called in both experimental replicates
H3K9me2 Prom WT 20	Called H3K9me2 promoter peak in wild type at 20°C, peak called in both experimental replicates
H3K9me2 Prom WT 26	Called H3K9me2 promoter peak in wild type at 26°C, peak called in both experimental replicates
H3K9me2 Prom 15B 20	Called H3K9me2 promoter peak in lin-15B at 20°C, peak called in both experimental replicates
H3K9me2 Prom 15B 26	Called H3K9me2 promoter peak in lin-15B at 26°C, peak called in both experimental replicates
H3K9me2 Prom 35 20	Called H3K9me2 promoter peak in lin-35 at 20°C, peak called in both experimental replicates
H3K9me2 Prom 35 26	Called H3K9me2 promoter peak in lin-35 at 26°C, peak called in both experimental replicates
H3K9me2 Prom 37 20	Called H3K9me2 promoter peak in lin-37 at 20°C, peak called in both experimental replicates
H3K9me2 Prom 37 26	Called H3K9me2 promoter peak in lin-37at 20°C, peak called in both experimental replicates
ubiquitous	Genes with ubiquitous expression (see Materials and Methods for details of category)
silent	Genes with no expression (see Materials and Methods for details of category)
soma-specific	Genes with soma-specific expression (see Materials and Methods for details of category)
germline-specific	Genes with germline-specific expression (see Materials and Methods for details of category)
HTA-germline	Genes with germline expression that are defined as HTA genes (see Materials and Methods for details of category)
122 up K4 down K9 15B	Genes that have higher H3K4me3 and lower H3K9me2 in lin-15B compared to wild type
HPL-2 bound	Genes bound by HPL-2 in early embryos (Garrigues et al. 2015)
DREAM bound	Genes bound by the DREAM complex in their promoter region in late embryos (Goetsch et al. 2017)
LIN-15B bound	Genes bound by LIN-15B in their promoter region in late embryos
up_lin-35	Genes up-regulated in lin-35 mutant L1s at 26°C (Petrella et al. 2011)
up_lin-15B	Genes up-regulated in lin-35 mutant L1s at 26°C (Petrella et al. 2011)
DREAM target	Genes bound by DREAM and up-regulated in lin-35 mutants
LIN-15B target	Genes bound by LIN-15B and up-regulated in lin-15B mutants

## Sheet: H3K9me2 data
Gene.WB.ID	Gene.Public.Name	Gene.Sequence.Name	Chr	Strand	Start	End	Operon	Chr.Left	Chr.Mid	Chr.Right	H3K9me2 GB WT 20	H3K9me2 GB WT 26	H3K9me2 GB 15B 20	H3K9me2 GB 15B 26	H3K9me2 GB 35 20	H3K9me2 GB 35 26	H3K9me2 GB 37 20	H3K9me2 GB 37 26	H3K9me2 Prom WT 20	H3K9me2 Prom WT 26	H3K9me2 Prom 15B 20	H3K9me2 Prom 15B 26	H3K9me2 Prom 35 20	H3K9me2 Prom 35 26	H3K9me2 Prom 37 20	H3K9me2 Prom 37 26	ubiquitous	silent	soma-specific	germline-specific	HTA-germline	122 up K4 down K9 15B	HPL-2 Bound	DREAM Bound	LIN-15B Bound	up_lin-35	up_lin-15B	DREAM Target	LIN-15B Target
WBGene00000073	add-2	F57F5.4	chrV	-1	12009532	12013586			1										1	1	1	1	1	1	1	1	1	0	0	0	0
WBGene00000134	amt-2	F49E11.3	chrIV	1	13042367	13046834				1									1	1	1	1	1	1	1	1	0	0	0	0	0		1
WBGene00019608	ani-2	K10B2.5	chrII	-1	6361130	6365272	CEOP2244		1										1	1	1	1	1	1	1	1	0	0	0	0	0
WBGene00008843	arrd-9	F15A4.9	chrII	-1	12479239	12480846				1									1	1	1	1	1	1	1	1	0	0	0	0	0						1
WBGene00044341	ave-1	M01G5.6	chrIII	-1	1495431	1496019	CEOP3838	1											1	1	1	1	1	1	1	1	0	0	0	0	0		1		1
WBGene00044290	B0035.18	B0035.18	chrIV	1	11320298	11320621	CEOP4436			1									1	1	1	1	1	1	1	1	0	0	0	0	0		1
WBGene00007109	B0035.6	B0035.6	chrIV	1	11320778	11323614	CEOP4436			1									1	1	1	1	1	1	1	1	0	0	0	0	0		1				1
WBGene00018665	bath-4	F52C6.8	chrII	-1	1916716	1917957	CEOP2052	1											1	1	1	1	1	1	1	1	0	0	0	0	0		1
WBGene00019142	btb-4	F59H6.12	chrII	1	2032498	2033230		1											1	1	1	1	1	1	1	1	0	0	0	0	0	1	1	1
WBGene00015386	C03B8.3	C03B8.3	chrIII	1	7712266	7717253			1										1	1	1	1	1	1	1	1	0	0	0	0	0	1	1		1	1
WBGene00014667	C06A1.4	C06A1.4	chrII	-1	10574783	10578134			1										1	1	1	1	1	1	1	1	0	0	0	1	0		1		1
WBGene00015588	C08A9.8	C08A9.8	chrX	-1	17102771	17104797			1										1	1	1	1	1	1	1	1	0	0	0	0	0
WBGene00007442	C08E8.6	C08E8.6	chrV	-1	18367986	18368394				1									1	1	1	1	1	1	1	1	0	0	0	0	0		1
WBGene00045487	C08E8.7	C08E8.7	chrV	-1	18344721	18345060				1									1	1	1	1	1	1	1	1	0	0	0	0	0		1
WBGene00045068	C08F11.16	C08F11.16	chrIV	-1	13652247	13652739				1									1	1	1	1	1	1	1	1	0	0	0	0	0
WBGene00015638	C09E7.4	C09E7.4	chrIII	-1	6534414	6536942			1										1	1	1	1	1	1	1	1	1	0	0	0	0
WBGene00007505	C10C5.1	C10C5.1	chrIV	-1	9359424	9366489			1										1	1	1	1	1	1	1	1	0	0	0	0	0
WBGene00044573	C15B12.9	C15B12.9	chrX	1	6468762	6469766			1										1	1	1	1	1	1	1	1	0	0	0	0	0
WBGene00015849	C16C8.11	C16C8.11	chrII	1	3453767	3454683	CEOP2104	1											1	1	1	1	1	1	1	1	0	0	0	0	0
WBGene00015924	C17H11.4	C17H11.4	chrX	-1	8180981	8181590			1										1	1	1	1	1	1	1	1	0	0	0	0	0
WBGene00015973	C18E3.4	C18E3.4	chrI	1	4202419	4203042			1										1	1	1	1	1	1	1	1	0	0	0	0	0		1
WBGene00016291	C31H1.8	C31H1.8	chrIV	-1	5811571	5814129			1										1	1	1	1	1	1	1	1	0	0	0	1	0		1
WBGene00007892	C33B4.4	C33B4.4	chrII	-1	11375554	11376207			1										1	1	1	1	1	1	1	1	1	0	0	0	0
WBGene00016350	C33E10.10	C33E10.10	chrX	-1	17301300	17301849			1										1	1	1	1	1	1	1	1	0	0	0	0	0
WBGene00016460	C35E7.8	C35E7.8	chrI	1	10808596	10810488			1										1	1	1	1	1	1	1	1	0	0	0	0	0
WBGene00016481	C36C5.12	C36C5.12	chrV	-1	3158427	3159418		1											1	1	1	1	1	1	1	1	0	0	0	0	0
WBGene00016551	C40A11.8	C40A11.8	chrII	-1	2150557	2151295		1											1	1	1	1	1	1	1	1	0	0	0	0	0		1
WBGene00008070	C43D7.8	C43D7.8	chrV	-1	19310554	19311029				1									1	1	1	1	1	1	1	1	0	0	0	0	0
WBGene00008119	C46F11.4	C46F11.4	chrIII	-1	3657695	3664476	CEOP3128	1											1	1	1	1	1	1	1	1	0	0	0	0	0		1		1
WBGene00008165	C47G2.4	C47G2.4	chrII	-1	11290781	11293508	CEOP2694		1										1	1	1	1	1	1	1	1	0	0	0	0	0			1
WBGene00044038	C47G2.6	C47G2.6	chrII	1	11293933	11294515			1										1	1	1	1	1	1	1	1	0	0	0	0	0
WBGene00008193	C49C3.3	C49C3.3	chrIV	-1	17319316	17319990				1									1	1	1	1	1	1	1	1	0	0	0	0	0
WBGene00016904	C53D5.3	C53D5.3	chrI	1	280120	280445		1											1	1	1	1	1	1	1	1	0	0	0	0	0
WBGene00008310	C54E10.6	C54E10.6	chrV	-1	18808051	18808632				1									1	1	1	1	1	1	1	1	0	0	1	0	0
WBGene00012484	car-1	Y18D10A.17	chrI	1	12904453	12906348				1									1	1	1	1	1	1	1	1	1	0	0	0	0		1		1
WBGene00000392	cdd-2	F49E8.4	chrIV	-1	7545504	7547884	CEOP4228		1										1	1	1	1	1	1	1	1	0	0	0	0	0		1
WBGene00000405	cdk-1	T05G5.3	chrIII	1	9747347	9748767			1										1	1	1	1	1	1	1	1	0	0	0	0	0		1	1
WBGene00009822	clec-113	F47G4.1	chrI	-1	14054581	14056882				1									1	1	1	1	1	1	1	1	0	0	0	0	0
WBGene00009526	clec-169	F38A1.14	chrIV	1	1261326	1264543		1											1	1	1	1	1	1	1	1	0	0	0	0	0
WBGene00019928	clec-44	R07C3.12	chrII	-1	919582	922709		1											1	1	1	1	1	1	1	1	0	0	0	0	0
WBGene00019606	clec-88	K10B2.3	chrII	1	6365706	6366916	CEOP2248		1										1	1	1	1	1	1	1	1	0	0	0	0	0
WBGene00010005	cnc-7	F53H2.2	chrV	1	20394042	20394701				1									1	1	1	1	1	1	1	1	0	0	0	0	0		1
WBGene00010036	cpar-1	F54C8.2	chrIII	1	9433990	9435016			1										1	1	1	1	1	1	1	1	0	0	0	0	0		1
WBGene00017037	D1069.3	D1069.3	chrII	-1	342137	347865		1											1	1	1	1	1	1	1	1	0	0	0	0	0		1		1
WBGene00008385	D1081.7	D1081.7	chrI	1	8487607	8490932	CEOP1929		1										1	1	1	1	1	1	1	1	0	0	0	0	1					1	1
WBGene00008387	D1081.9	D1081.9	chrI	-1	8485804	8487037			1										1	1	1	1	1	1	1	1	0	0	0	0	1					1	1
WBGene00008412	D2030.2	D2030.2	chrI	1	7574191	7578560			1										1	1	1	1	1	1	1	1	0	0	0	0	0
WBGene00000941	ddp-1	Y39A3CR.4	chrIII	1	1859879	1860365	CEOP3072	1											1	1	1	1	1	1	1	1	1	0	0	0	0		1	1	1
WBGene00013712	dlc-6	Y106G6G.3	chrI	1	10323545	10324139			1										1	1	1	1	1	1	1	1	0	0	0	0	0
WBGene00017097	E02C12.12	E02C12.12	chrV	-1	9380044	9382312			1										1	1	1	1	1	1	1	1	0	0	0	0	0		1	1
WBGene00014730	F01D5.4	F01D5.4	chrII	-1	14000306	14000961				1									1	1	1	1	1	1	1	1	0	0	0	0	0
WBGene00017223	F07G6.3	F07G6.3	chrX	1	1723087	1724883		1											1	1	1	1	1	1	1	1	0	0	0	0	0		1
WBGene00077549	F11A6.3	F11A6.3	chrI	1	11687802	11688513				1									1	1	1	1	1	1	1	1	0	0	0	0	0		1
WBGene00017401	F12D9.2	F12D9.2	chrX	-1	8646554	8647045			1										1	1	1	1	1	1	1	1	0	0	0	0	0		1
WBGene00017402	F12E12.1	F12E12.1	chrII	1	3741885	3742507		1											1	1	1	1	1	1	1	1	0	0	0	0	0
WBGene00008781	F14B4.3	F14B4.3	chrI	-1	9280954	9286569			1										1	1	1	1	1	1	1	1	0	0	0	0	0		1	1
WBGene00017462	F14D2.14	F14D2.14	chrII	-1	3346823	3347518		1											1	1	1	1	1	1	1	1	0	0	0	0	0
WBGene00045458	F17B5.8	F17B5.8	chrI	1	13191105	13191910				1									1	1	1	1	1	1	1	1	0	0	0	0	0		1
WBGene00023272	F22E5.19	F22E5.19	chrII	1	2658917	2659179		1											1	1	1	1	1	1	1	1	0	0	0	0	0
WBGene00017730	F22H10.6	F22H10.6	chrX	-1	16689293	16690983			1										1	1	1	1	1	1	1	1	0	0	0	0	0
WBGene00077506	F25D1.7	F25D1.7	chrV	1	10538469	10538764			1										1	1	1	1	1	1	1	1	0	0	0	0	0		1		1
WBGene00009143	F26A3.5	F26A3.5	chrI	1	7668531	7669793			1										1	1	1	1	1	1	1	1	0	0	0	0	0		1
WBGene00017913	F29A7.3	F29A7.3	chrII	1	2753304	2753864		1											1	1	1	1	1	1	1	1	0	0	0	0	0		1		1
WBGene00017914	F29A7.4	F29A7.4	chrII	1	2748593	2751578		1											1	1	1	1	1	1	1	1	0	0	0	0	0		1
WBGene00017915	F29A7.5	F29A7.5	chrII	-1	2747398	2747733		1											1	1	1	1	1	1	1	1	0	0	0	0	0		1
WBGene00017916	F29A7.6	F29A7.6	chrII	-1	2751765	2752618		1											1	1	1	1	1	1	1	1	0	0	0	0	0		1		1
WBGene00009272	F30F8.3	F30F8.3	chrI	1	7835807	7836963	CEOP1424		1										1	1	1	1	1	1	1	1	0	0	0	1	0		1		1
WBGene00009280	F31B9.3	F31B9.3	chrX	1	15923668	15924679			1										1	1	1	1	1	1	1	1	0	0	0	1	0		1
WBGene00009302	F31F6.3	F31F6.3	chrX	-1	14871767	14872792			1										1	1	1	1	1	1	1	1	0	0	0	0	0
WBGene00017976	F32B5.2	F32B5.2	chrI	1	2697442	2699957		1											1	1	1	1	1	1	1	1	0	0	0	0	0
WBGene00044364	F34D6.7	F34D6.7	chrII	1	2687630	2687893		1											1	1	1	1	1	1	1	1	0	0	0	0	0		1
WBGene00044366	F34D6.9	F34D6.9	chrII	-1	2689874	2690185		1											1	1	1	1	1	1	1	1	0	0	0	0	0		1
WBGene00086556	F36D1.12	F36D1.12	chrI	-1	11261219	11261969				1									1	1	1	1	1	1	1	1	0	0	0	0	0		1
WBGene00009466	F36D1.7	F36D1.7	chrI	1	11263140	11263659				1									1	1	1	1	1	1	1	1	0	0	0	0	0		1
WBGene00009497	F36H1.12	F36H1.12	chrIV	-1	11052795	11053613				1									1	1	1	1	1	1	1	1	0	0	0	0	0
WBGene00018118	F36H12.2	F36H12.2	chrIV	1	5274495	5276102			1										1	1	1	1	1	1	1	1	0	0	0	1	0
WBGene00045037	F38A1.17	F38A1.17	chrIV	-1	1260207	1260519		1											1	1	1	1	1	1	1	1	0	0	0	0	0
WBGene00018297	F41F3.3	F41F3.3	chrV	-1	4647647	4648229		1											1	1	1	1	1	1	1	1	0	0	1	0	0
WBGene00018358	F42G8.7	F42G8.7	chrIV	1	8125640	8128895			1										1	1	1	1	1	1	1	1	0	0	1	0	0
WBGene00009670	F43G9.8	F43G9.8	chrI	1	8617394	8618900			1										1	1	1	1	1	1	1	1	0	0	0	0	0
WBGene00009690	F44E5.3	F44E5.3	chrII	-1	11762103	11765599			1										1	1	1	1	1	1	1	1	0	0	0	0	0
WBGene00018643	F49F1.1	F49F1.1	chrIV	1	4117781	4119172		1											1	1	1	1	1	1	1	1	0	0	0	0	0		1
WBGene00009923	F52B5.7	F52B5.7	chrI	-1	8313221	8315337			1										1	1	1	1	1	1	1	1	0	0	0	0	0		1
WBGene00009951	F53A2.3	F53A2.3	chrIII	-1	13336800	13339659				1									1	1	1	1	1	1	1	1	0	0	0	0	0		1
WBGene00009959	F53B6.4	F53B6.4	chrI	-1	8947327	8948704			1										1	1	1	1	1	1	1	1	0	0	0	0	0
WBGene00018770	F53G2.8	F53G2.8	chrII	-1	2483412	2483874		1											1	1	1	1	1	1	1	1	0	0	0	0	0		1
WBGene00010066	F54F7.6	F54F7.6	chrX	1	11865474	11866993			1										1	1	1	1	1	1	1	1	0	0	0	0	0
WBGene00010107	F55C9.11	F55C9.11	chrV	-1	19307213	19307554				1									1	1	1	1	1	1	1	1	0	0	0	0	0		1
WBGene00185001	F56A8.9	F56A8.9	chrIII	1	13254567	13256284				1									1	1	1	1	1	1	1	1	0	0	0	0	0		1		1
WBGene00014772	F56D5.4	F56D5.4	chrIV	-1	9402559	9404021			1										1	1	1	1	1	1	1	1	0	0	0	0	0				1
WBGene00019019	F57H12.4	F57H12.4	chrIV	1	7970203	7973793			1										1	1	1	1	1	1	1	1	0	0	0	0	0
WBGene00013620	fbxa-111	Y102A5C.14	chrV	-1	16948635	16949650				1									1	1	1	1	1	1	1	1	0	0	0	0	0
WBGene00007164	fbxa-139	B0391.9	chrV	-1	15593443	15593780				1									1	1	1	1	1	1	1	1	0	0	0	0	0
WBGene00009840	fbxa-189	F47H4.9	chrV	1	17345203	17347684				1									1	1	1	1	1	1	1	1	0	0	1	0	0					1	1
WBGene00012568	fbxa-212	Y37H2A.8	chrV	1	18134694	18135994				1									1	1	1	1	1	1	1	1	0	0	0	0	0		1
WBGene00012954	fbxa-217	Y47H9C.11	chrI	1	11903725	11905139				1									1	1	1	1	1	1	1	1	0	0	0	0	0		1
WBGene00020639	fbxa-71	T20H9.3	chrIII	1	2255993	2257368		1											1	1	1	1	1	1	1	1	0	0	0	0	0						1
WBGene00009490	fbxa-99	F36G9.14	chrV	-1	15981671	15982834				1									1	1	1	1	1	1	1	1	0	0	0	0	0		1
WBGene00013410	fbxb-94	Y63D3A.11	chrI	-1	14085676	14086673				1									1	1	1	1	1	1	1	1	0	0	0	0	0
WBGene00019922	fbxc-28	R07C3.6	chrII	1	923895	925155		1											1	1	1	1	1	1	1	1	0	0	0	0	0
WBGene00019171	fipr-29	H06I04.7	chrIII	-1	3059590	3059935		1											1	1	1	1	1	1	1	1	0	0	0	0	0		1
WBGene00012435	flh-1	Y11D7A.12	chrIV	-1	9261789	9264248			1										1	1	1	1	1	1	1	1	0	0	0	0	0		1
WBGene00001571	gei-14	K01C8.5	chrII	-1	8273419	8275971	CEOP2742		1										1	1	1	1	1	1	1	1	0	0	0	0	1			1	1	1		1
WBGene00194747	H05C05.4	H05C05.4	chrIII	-1	2944686	2945072		1											1	1	1	1	1	1	1	1	0	0	0	0	0		1
WBGene00019189	H11L12.1	H11L12.1	chrX	-1	17710410	17711598			1										1	1	1	1	1	1	1	1	0	0	0	0	0		1
WBGene00044142	H13N06.7	H13N06.7	chrX	1	15503336	15505305			1										1	1	1	1	1	1	1	1	0	0	0	0	0
WBGene00019248	H27M09.5	H27M09.5	chrI	-1	6845179	6846953			1										1	1	1	1	1	1	1	1	0	0	0	0	0		1
WBGene00001819	haf-9	ZK484.2	chrI	1	6081800	6085964			1										1	1	1	1	1	1	1	1	0	0	1	0	0		1
WBGene00001832	hcp-4	T03F1.9	chrI	-1	3862778	3865941	CEOP1120		1										1	1	1	1	1	1	1	1	0	0	0	0	0		1	1	1
WBGene00016405	hecd-1	C34D4.14	chrIV	-1	7134335	7144886	CEOP4212		1										1	1	1	1	1	1	1	1	1	0	0	0	0
WBGene00001858	hil-7	C01B10.5	chrIV	1	6646023	6646928			1										1	1	1	1	1	1	1	1	0	0	1	0	0		1
WBGene00001946	his-72	Y49E10.6	chrIII	-1	12367374	12368065				1									1	1	1	1	1	1	1	1	1	0	0	0	0		1	1	1
WBGene00002002	hsb-1	K08E7.2	chrIV	-1	12564662	12567205	CEOP4520			1									1	1	1	1	1	1	1	1	1	0	0	0	0		1
WBGene00022498	hsd-2	ZC8.1	chrX	1	5005238	5006993			1										1	1	1	1	1	1	1	1	0	0	0	0	0		1	1
WBGene00002026	hsp-70	C12C8.1	chrI	-1	9320353	9322503			1										1	1	1	1	1	1	1	1	0	0	0	0	0						1
WBGene00013740	hut-1	Y111B2A.20	chrIII	1	12711413	12713776	CEOP3824			1									1	1	1	1	1	1	1	1	0	0	0	0	0		1	1	1
WBGene00007979	imp-1	C36B1.12	chrI	1	8752228	8755672			1										1	1	1	1	1	1	1	1	1	0	0	0	0		1
WBGene00002109	ins-26	ZC334.1	chrI	-1	14037138	14037791				1									1	1	1	1	1	1	1	1	0	0	0	0	0
WBGene00010459	K01C8.7	K01C8.7	chrII	1	8276290	8277569			1										1	1	1	1	1	1	1	1	0	0	0	0	0			1	1
WBGene00010513	K02E11.4	K02E11.4	chrV	-1	14247509	14248060			1										1	1	1	1	1	1	1	1	0	0	0	0	0
WBGene00010518	K02E11.9	K02E11.9	chrV	1	14248773	14250508			1										1	1	1	1	1	1	1	1	0	0	0	0	0
WBGene00019350	K02H11.9	K02H11.9	chrV	-1	1535224	1537079		1											1	1	1	1	1	1	1	1	0	0	0	0	0
WBGene00014795	K03D7.1	K03D7.1	chrV	1	17514780	17519269				1									1	1	1	1	1	1	1	1	0	0	0	0	0
WBGene00019462	K07A9.3	K07A9.3	chrIV	1	1834625	1836420		1											1	1	1	1	1	1	1	1	0	0	0	0	0		1
WBGene00050947	K07C5.13	K07C5.13	chrV	1	10342509	10342589	CEOP5254		1										1	1	1	1	1	1	1	1	0	0	0	0	0		1		1
WBGene00019538	K08D12.4	K08D12.4	chrIV	1	1707296	1707774		1											1	1	1	1	1	1	1	1	0	0	0	0	0		1
WBGene00019541	K08F11.1	K08F11.1	chrIV	1	4724854	4725305			1										1	1	1	1	1	1	1	1	0	0	0	0	0				1
WBGene00044458	K11H12.10	K11H12.10	chrIV	1	676075	676687		1											1	1	1	1	1	1	1	1	0	0	0	0	0
WBGene00019660	K11H12.4	K11H12.4	chrIV	-1	674038	675883		1											1	1	1	1	1	1	1	1	0	0	0	0	0						1
WBGene00002215	klc-2	C18C4.10	chrV	-1	5575394	5581697			1										1	1	1	1	1	1	1	1	0	0	1	0	0		1
WBGene00002992	lin-3	F36H1.4	chrIV	1	11054289	11063592				1									1	1	1	1	1	1	1	1	0	0	0	0	0						1
WBGene00003029	lin-44	E01A2.3	chrI	1	4126058	4129312			1										1	1	1	1	1	1	1	1	0	0	0	0	0		1	1
WBGene00003067	lrg-1	F55H2.4	chrIII	1	9504680	9506997	CEOP3880		1										1	1	1	1	1	1	1	1	0	0	0	0	0
WBGene00020287	lsy-13	T06A10.4	chrIV	1	16862363	16865452	CEOP4668			1									1	1	1	1	1	1	1	1	0	0	0	0	0		1
WBGene00010815	M01F1.9	M01F1.9	chrIII	-1	3493798	3499044	CEOP3124	1											1	1	1	1	1	1	1	1	0	0	0	0	0		1		1
WBGene00010817	M01G12.2	M01G12.2	chrI	-1	12132544	12133630				1									1	1	1	1	1	1	1	1	0	0	0	0	0
WBGene00077658	M106.8	M106.8	chrII	-1	10841327	10843565	CEOP2715		1										1	1	1	1	1	1	1	1	0	0	0	0	0
WBGene00019792	M116.5	M116.5	chrIV	-1	8414280	8421050			1										1	1	1	1	1	1	1	1	0	0	0	0	0
WBGene00019766	M4.1	M4.1	chrIV	1	3213769	3217665		1											1	1	1	1	1	1	1	1	0	0	0	0	0		1	1	1
WBGene00015015	math-1	B0047.4	chrII	-1	2045968	2046661		1											1	1	1	1	1	1	1	1	0	0	0	0	0		1		1		1		1
WBGene00018663	math-31	F52C6.6	chrII	-1	1912455	1912846		1											1	1	1	1	1	1	1	1	0	0	0	0	0		1
WBGene00015836	math-7	C16C4.12	chrII	-1	1885444	1886484		1											1	1	1	1	1	1	1	1	0	0	0	0	0
WBGene00022531	morc-1	ZC155.3	chrIII	-1	5203650	5206872	CEOP3848		1										1	1	1	1	1	1	1	1	0	0	0	0	0		1				1
WBGene00003507	mut-14	C14C11.6	chrV	-1	5658691	5660690			1										1	1	1	1	1	1	1	1	0	0	0	0	0
WBGene00003712	nhr-122	Y41D4B.9	chrIV	1	1613896	1616765		1											1	1	1	1	1	1	1	1	0	0	0	0	0
WBGene00013363	nhr-240	Y60A3A.15	chrV	-1	19925377	19926089				1									1	1	1	1	1	1	1	1	0	0	0	0	0		1
WBGene00003644	nhr-54	F36D3.2	chrV	-1	16503926	16505896				1									1	1	1	1	1	1	1	1	0	0	0	0	0		1
WBGene00003829	nud-1	F53A2.4	chrIII	1	13341424	13342507	CEOP3784			1									1	1	1	1	1	1	1	1	1	0	0	0	0		1	1	1
WBGene00008976	plp-2	F20D1.4	chrX	-1	14982070	14982734			1										1	1	1	1	1	1	1	1	0	0	0	0	0				1
WBGene00009173	prom-1	F26H9.1	chrI	1	9287439	9290144			1										1	1	1	1	1	1	1	1	0	0	0	0	0		1	1
WBGene00019858	R03H10.6	R03H10.6	chrII	-1	4171297	4173878		1											1	1	1	1	1	1	1	1	0	0	1	0	0			1			1
WBGene00019916	R06B10.7	R06B10.7	chrIII	-1	1001134	1001400		1											1	1	1	1	1	1	1	1	0	0	0	0	0		1
WBGene00011056	R06B9.5	R06B9.5	chrII	1	13736280	13736864				1									1	1	1	1	1	1	1	1	0	0	0	0	0		1			1
WBGene00011128	R07H5.8	R07H5.8	chrIV	-1	11209279	11210811				1									1	1	1	1	1	1	1	1	1	0	0	0	0			1	1
WBGene00020021	R12B2.7	R12B2.7	chrIII	1	5815001	5815469			1										1	1	1	1	1	1	1	1	0	0	0	0	0		1
WBGene00020063	R13D11.10	R13D11.10	chrV	-1	812813	813195		1											1	1	1	1	1	1	1	1	0	0	0	0	0
WBGene00020101	R148.2	R148.2	chrIII	1	3183668	3185232	CEOP3100	1											1	1	1	1	1	1	1	1	0	0	0	0	0		1		1
WBGene00007355	rpb-6	C06A1.5	chrII	1	10579307	10580552	CEOP2496		1										1	1	1	1	1	1	1	1	1	0	0	0	0		1	1	1
WBGene00013233	sdz-33	Y56A3A.14	chrIII	1	11907429	11908374				1									1	1	1	1	1	1	1	1	0	0	0	0	0
WBGene00013985	sec-16	ZK512.5	chrIII	1	9125762	9130733			1										1	1	1	1	1	1	1	1	1	0	0	0	0		1		1
WBGene00008527	set-8	F02D10.7	chrX	1	13444912	13448162			1										1	1	1	1	1	1	1	1	0	0	0	0	0
WBGene00004888	smo-1	K12C11.2	chrI	1	1340680	1341260	CEOP1962	1											1	1	1	1	1	1	1	1	0	0	0	0	0		1	1	1
WBGene00011747	sna-2	T13F2.7	chrIV	-1	9774570	9777614			1										1	1	1	1	1	1	1	1	1	0	0	0	0		1	1	1
WBGene00021335	spp-23	Y34D9A.11	chrI	1	1018838	1019222		1											1	1	1	1	1	1	1	1	0	0	0	0	0		1
WBGene00005014	spt-4	F54C4.2	chrIII	-1	69071	69816	CEOP3004	1											1	1	1	1	1	1	1	1	0	0	0	0	0		1
WBGene00007123	srbc-79	B0250.6	chrV	-1	20490740	20492454				1									1	1	1	1	1	1	1	1	0	0	0	0	0		1		1
WBGene00005343	srh-126	F18E3.3	chrV	-1	7421836	7422918			1										1	1	1	1	1	1	1	1	0	0	0	0	0
WBGene00005259	srh-36	T03D3.4	chrV	-1	2819579	2821666		1											1	1	1	1	1	1	1	1	0	1	0	0	0
WBGene00005992	srx-101	F40H7.4	chrII	-1	3689470	3690749		1											1	1	1	1	1	1	1	1	0	0	0	0	0		1				1
WBGene00005903	srx-12	Y55F3AM.2	chrIV	1	1046032	1049506		1											1	1	1	1	1	1	1	1	0	1	0	0	0		1
WBGene00023462	srz-83	C09G12.10	chrIV	1	3504441	3506112		1											1	1	1	1	1	1	1	1	0	0	0	0	0
WBGene00023488	srz-84	T26A8.5	chrIV	1	8422040	8424133			1										1	1	1	1	1	1	1	1	0	0	0	0	0
WBGene00006187	str-138	ZC513.11	chrV	1	8058639	8060297			1										1	1	1	1	1	1	1	1	0	0	0	0	0		1
WBGene00006263	str-232	T10C6.1	chrV	-1	16014489	16015732				1									1	1	1	1	1	1	1	1	0	0	0	0	0
WBGene00006104	str-39	F37B4.12	chrV	-1	2877802	2879899		1											1	1	1	1	1	1	1	1	0	0	0	0	0
WBGene00019247	syp-4	H27M09.3	chrI	1	6847510	6849923	CEOP1902		1										1	1	1	1	1	1	1	1	0	0	0	0	0		1
WBGene00011310	T01B4.3	T01B4.3	chrX	-1	16315356	16317659			1										1	1	1	1	1	1	1	1	0	0	0	0	0
WBGene00011386	T02G6.3	T02G6.3	chrI	1	11813770	11814442				1									1	1	1	1	1	1	1	1	0	0	0	0	0
WBGene00020271	T05H4.8	T05H4.8	chrV	-1	6417731	6418292			1										1	1	1	1	1	1	1	1	0	0	0	0	0		1
WBGene00020285	T06A10.2	T06A10.2	chrIV	1	16895335	16896046				1									1	1	1	1	1	1	1	1	0	0	0	0	0		1
WBGene00020345	T08B2.4	T08B2.4	chrI	1	6225098	6225966			1										1	1	1	1	1	1	1	1	0	0	0	0	0		1
WBGene00014836	T09F5.12	T09F5.12	chrV	-1	15164731	15166299			1										1	1	1	1	1	1	1	1	0	0	0	0	0
WBGene00020414	T10E9.4	T10E9.4	chrI	1	6525050	6528690			1										1	1	1	1	1	1	1	1	0	0	0	0	0
WBGene00020415	T10E9.5	T10E9.5	chrI	-1	6521789	6523954			1										1	1	1	1	1	1	1	1	0	0	0	0	0
WBGene00011746	T13F2.6	T13F2.6	chrIV	1	9778268	9781180			1										1	1	1	1	1	1	1	1	0	0	0	1	0		1	1	1	1		1
WBGene00020494	T13G4.7	T13G4.7	chrX	-1	1203428	1203758		1											1	1	1	1	1	1	1	1	0	0	0	0	0
WBGene00011872	T20G5.10	T20G5.10	chrIII	-1	10210955	10211854			1										1	1	1	1	1	1	1	1	0	0	0	0	0		1
WBGene00014845	T23F1.2	T23F1.2	chrV	1	15453471	15454117			1										1	1	1	1	1	1	1	1	0	0	0	0	0
WBGene00005324	T27A1.1	T27A1.1	chrII	-1	503229	506014		1											1	1	1	1	1	1	1	1	0	0	0	0	0		1	1
WBGene00006392	taf-10	K03B4.3	chrV	1	4687093	4688775	CEOP5060	1											1	1	1	1	1	1	1	1	1	0	0	0	0		1		1
WBGene00044323	tag-281	F15A4.11	chrII	1	12459708	12460485	CEOP2711			1									1	1	1	1	1	1	1	1	0	0	0	0	0		1	1	1
WBGene00006570	tig-2	F39G3.8	chrV	-1	4726705	4730155		1											1	1	1	1	1	1	1	1	0	0	0	0	0		1
WBGene00050892	ttr-57	F46B3.18	chrV	1	20605074	20605693				1									1	1	1	1	1	1	1	1	0	0	0	0	0		1
WBGene00012161	VY35H6BL.2	VY35H6BL.2	chrX	-1	19149	20433		1											1	1	1	1	1	1	1	1	0	0	0	0	0		1
WBGene00020926	W02B3.6	W02B3.6	chrIII	-1	690344	690742		1											1	1	1	1	1	1	1	1	0	0	0	0	0
WBGene00020957	W02H5.2	W02H5.2	chrV	1	2638719	2639447		1											1	1	1	1	1	1	1	1	0	0	0	0	0			1
WBGene00012223	W03C9.8	W03C9.8	chrII	1	11948681	11949404			1										1	1	1	1	1	1	1	1	0	0	0	0	0		1
WBGene00021015	W03G9.3	W03G9.3	chrI	1	4959399	4961525	CEOP1948		1										1	1	1	1	1	1	1	1	0	0	0	0	0		1		1
WBGene00044431	W03G9.8	W03G9.8	chrI	-1	4957776	4958567	CEOP1208		1										1	1	1	1	1	1	1	1	1	0	0	0	0	1	1	1	1
WBGene00021034	W05F2.2	W05F2.2	chrI	-1	3363822	3365859		1											1	1	1	1	1	1	1	1	0	0	0	0	0		1
WBGene00021090	W08E12.9	W08E12.9	chrIV	-1	3306738	3307560		1											1	1	1	1	1	1	1	1	0	0	0	0	0
WBGene00194659	W09C5.11	W09C5.11	chrI	1	13652345	13652704				1									1	1	1	1	1	1	1	1	0	0	0	0	0		1		1
WBGene00012373	W09H1.3	W09H1.3	chrII	1	13184359	13184953				1									1	1	1	1	1	1	1	1	0	0	0	0	0		1
WBGene00014956	Y102A5C.11	Y102A5C.11	chrV	1	16943167	16943812				1									1	1	1	1	1	1	1	1	0	0	0	0	0
WBGene00013611	Y102A5C.2	Y102A5C.2	chrV	1	16918786	16919523				1									1	1	1	1	1	1	1	1	0	0	0	0	0		1
WBGene00045290	Y102A5C.37	Y102A5C.37	chrV	-1	16943878	16944119				1									1	1	1	1	1	1	1	1	0	0	0	0	0
WBGene00013659	Y105C5B.20	Y105C5B.20	chrIV	-1	15993422	15994411				1									1	1	1	1	1	1	1	1	0	0	0	0	0
WBGene00013691	Y105E8B.6	Y105E8B.6	chrI	1	14662527	14662916	CEOP1744			1									1	1	1	1	1	1	1	1	0	0	0	0	0		1		1
WBGene00013715	Y106G6G.6	Y106G6G.6	chrI	-1	10319660	10321484			1										1	1	1	1	1	1	1	1	0	0	0	0	0
WBGene00013728	Y111B2A.2	Y111B2A.2	chrIII	1	12495985	12496582	CEOP3764			1									1	1	1	1	1	1	1	1	0	0	0	0	0		1
WBGene00013817	Y116F11A.3	Y116F11A.3	chrV	1	19729008	19729560				1									1	1	1	1	1	1	1	1	0	0	0	0	0		1
WBGene00013819	Y116F11A.6	Y116F11A.6	chrV	1	19727451	19727892				1									1	1	1	1	1	1	1	1	0	0	0	0	0		1
WBGene00022497	Y119D3B.21	Y119D3B.21	chrIII	1	1214944	1215279		1											1	1	1	1	1	1	1	1	0	0	0	0	0						1
WBGene00044382	Y14H12A.2	Y14H12A.2	chrII	-1	3988703	3989689		1											1	1	1	1	1	1	1	1	0	0	0	0	0
WBGene00012465	Y17G7B.12	Y17G7B.12	chrII	1	12023693	12025868	CEOP2698			1									1	1	1	1	1	1	1	1	0	0	0	0	0		1		1
WBGene00012477	Y18D10A.4	Y18D10A.4	chrI	1	12815894	12816418				1									1	1	1	1	1	1	1	1	0	0	0	0	0
WBGene00189932	Y26G10.7	Y26G10.7	chrV	-1	17696164	17696822				1									1	1	1	1	1	1	1	1	0	0	0	0	0		1
WBGene00021308	Y32G9A.11	Y32G9A.11	chrV	1	1912327	1912903		1											1	1	1	1	1	1	1	1	0	0	0	0	0
WBGene00021302	Y32G9A.3	Y32G9A.3	chrV	1	1912951	1913469		1											1	1	1	1	1	1	1	1	0	0	0	0	0
WBGene00021337	Y34F4.2	Y34F4.2	chrIII	1	1010524	1011388		1											1	1	1	1	1	1	1	1	0	0	0	0	0
WBGene00014870	Y37H9A.4	Y37H9A.4	chrI	1	13795265	13795855				1									1	1	1	1	1	1	1	1	0	0	0	0	0	1	1
WBGene00014871	Y37H9A.5	Y37H9A.5	chrI	-1	13796151	13796878	CEOP1724			1									1	1	1	1	1	1	1	1	0	0	0	0	0		1
WBGene00021441	Y39A3CL.3	Y39A3CL.3	chrIII	1	1777801	1778303		1											1	1	1	1	1	1	1	1	0	0	0	0	0		1		1
WBGene00012691	Y39B6A.32	Y39B6A.32	chrV	-1	19007507	19008115				1									1	1	1	1	1	1	1	1	0	0	0	0	0		1
WBGene00195240	Y39B6A.69	Y39B6A.69	chrV	-1	19152250	19152399				1									1	1	1	1	1	1	1	1	0	0	0	0	0		1
WBGene00021475	Y39G10AR.20	Y39G10AR.20	chrI	1	2312498	2313081	CEOP1040	1											1	1	1	1	1	1	1	1	1	0	0	0	0		1		1
WBGene00012761	Y41C4A.18	Y41C4A.18	chrIII	1	11730607	11731205				1									1	1	1	1	1	1	1	1	0	0	0	0	0		1
WBGene00194733	Y41C4A.21	Y41C4A.21	chrIII	1	11732342	11732673				1									1	1	1	1	1	1	1	1	0	0	0	0	0		1
WBGene00045000	Y41E3.20	Y41E3.20	chrIV	1	14974260	14974529				1									1	1	1	1	1	1	1	1	0	0	0	0	0
WBGene00014576	Y43F11A.6	Y43F11A.6	chrII	-1	12131466	12132830	CEOP2590			1									1	1	1	1	1	1	1	1	0	0	0	0	0		1
WBGene00021556	Y45G5AM.3	Y45G5AM.3	chrV	1	4164830	4166744		1											1	1	1	1	1	1	1	1	1	0	0	0	0
WBGene00195003	Y46C8AL.11	Y46C8AL.11	chrIV	1	3943297	3943738		1											1	1	1	1	1	1	1	1	0	0	0	0	0
WBGene00012955	Y47H9C.12	Y47H9C.12	chrI	1	11896665	11896973				1									1	1	1	1	1	1	1	1	0	0	0	0	0		1
WBGene00012956	Y47H9C.14	Y47H9C.14	chrI	1	11897398	11898512				1									1	1	1	1	1	1	1	1	0	0	0	0	0		1		1
WBGene00044466	Y48A5A.3	Y48A5A.3	chrIV	1	1969737	1970285	CEOP4052	1											1	1	1	1	1	1	1	1	0	0	0	0	0		1
WBGene00021656	Y48D7A.1	Y48D7A.1	chrX	1	3009489	3010165			1										1	1	1	1	1	1	1	1	0	0	0	0	0
WBGene00021672	Y48G1BM.7	Y48G1BM.7	chrI	-1	238616	239021		1											1	1	1	1	1	1	1	1	0	0	0	0	0
WBGene00021690	Y48G8AL.12	Y48G8AL.12	chrI	-1	1218497	1218985		1											1	1	1	1	1	1	1	1	0	0	0	0	0
WBGene00021694	Y48G8AR.3	Y48G8AR.3	chrI	1	1287306	1287961		1											1	1	1	1	1	1	1	1	0	0	0	0	0
WBGene00021701	Y48G9A.7	Y48G9A.7	chrIII	1	2111790	2112390		1											1	1	1	1	1	1	1	1	0	0	0	0	0		1	1	1
WBGene00044378	Y49F6B.14	Y49F6B.14	chrII	-1	3514966	3515487		1											1	1	1	1	1	1	1	1	0	0	0	0	0		1
WBGene00021760	Y50F7A.2	Y50F7A.2	chrII	1	1182864	1184391		1											1	1	1	1	1	1	1	1	0	0	0	0	0		1
WBGene00013071	Y51A2B.8	Y51A2B.8	chrV	1	18379091	18379261				1									1	1	1	1	1	1	1	1	0	0	0	0	0		1
WBGene00077653	Y51A2D.23	Y51A2D.23	chrV	-1	18529364	18529850				1									1	1	1	1	1	1	1	1	0	0	0	0	0		1
WBGene00013117	Y51H4A.23	Y51H4A.23	chrIV	1	16722883	16723859				1									1	1	1	1	1	1	1	1	0	0	0	0	0
WBGene00194647	Y51H4A.935	Y51H4A.935	chrIV	-1	16506565	16507174				1									1	1	1	1	1	1	1	1	0	0	0	0	0		1
WBGene00014915	Y53C10A.1	Y53C10A.1	chrI	1	11966262	11967582				1									1	1	1	1	1	1	1	1	0	0	0	0	0		1		1
WBGene00013134	Y53C10A.3	Y53C10A.3	chrI	-1	11968943	11969838				1									1	1	1	1	1	1	1	1	0	0	0	0	0
WBGene00021837	Y54E10BL.1	Y54E10BL.1	chrI	1	3012113	3012442		1											1	1	1	1	1	1	1	1	0	0	0	0	0
WBGene00077763	Y57G11B.97	Y57G11B.97	chrIV	-1	14570227	14572605				1									1	1	1	1	1	1	1	1	0	0	0	0	0
WBGene00045311	Y57G11C.57	Y57G11C.57	chrIV	-1	14780908	14781234				1									1	1	1	1	1	1	1	1	0	0	0	0	0		1
WBGene00021967	Y57G7A.3	Y57G7A.3	chrII	1	1285804	1286380		1											1	1	1	1	1	1	1	1	0	0	0	0	0
WBGene00021165	Y5H2B.3	Y5H2B.3	chrV	1	2188284	2189024		1											1	1	1	1	1	1	1	1	0	0	0	0	0
WBGene00045202	Y64G10A.13	Y64G10A.13	chrIV	-1	14281521	14282129				1									1	1	1	1	1	1	1	1	0	0	0	0	0
WBGene00013446	Y66D12A.21	Y66D12A.21	chrIII	-1	11502930	11505177	CEOP3724			1									1	1	1	1	1	1	1	1	1	0	0	0	0		1		1
WBGene00013432	Y66D12A.6	Y66D12A.6	chrIII	-1	11580711	11581394	CEOP3886			1									1	1	1	1	1	1	1	1	0	0	0	0	0		1
WBGene00022066	Y67D8C.2	Y67D8C.2	chrIV	1	3072483	3073913		1											1	1	1	1	1	1	1	1	0	0	0	0	0		1
WBGene00077451	Y69H2.16	Y69H2.16	chrV	1	18706003	18706226				1									1	1	1	1	1	1	1	1	0	0	0	0	0
WBGene00077654	Y69H2.18	Y69H2.18	chrV	-1	18705520	18705752				1									1	1	1	1	1	1	1	1	0	0	0	0	0
WBGene00022194	Y71H2B.4	Y71H2B.4	chrIII	1	2618930	2619372	CEOP3080	1											1	1	1	1	1	1	1	1	0	0	1	0	0		1		1
WBGene00022221	Y73B3A.20	Y73B3A.20	chrX	1	47799	48496		1											1	1	1	1	1	1	1	1	0	0	0	0	0		1		1
WBGene00013521	Y73F8A.12	Y73F8A.12	chrIV	-1	15311152	15311644				1									1	1	1	1	1	1	1	1	0	0	0	0	0		1
WBGene00013522	Y73F8A.13	Y73F8A.13	chrIV	1	15312273	15314386				1									1	1	1	1	1	1	1	1	0	0	0	0	0		1
WBGene00013567	Y75B12B.1	Y75B12B.1	chrV	1	15184689	15185857			1										1	1	1	1	1	1	1	1	0	0	0	0	0		1
WBGene00022302	Y76B12C.8	Y76B12C.8	chrIV	1	1979988	1980363		1											1	1	1	1	1	1	1	1	0	0	0	0	0						1
WBGene00012409	Y7A5A.3	Y7A5A.3	chrX	-1	15781557	15784602			1										1	1	1	1	1	1	1	1	0	0	0	0	0		1
WBGene00022346	Y82E9BR.13	Y82E9BR.13	chrIII	-1	1390444	1391844		1											1	1	1	1	1	1	1	1	0	0	0	0	0					1	1
WBGene00022359	Y92H12A.3	Y92H12A.3	chrI	1	1529891	1534238		1											1	1	1	1	1	1	1	1	0	0	0	0	0
WBGene00013876	ZC376.4	ZC376.4	chrV	1	14178064	14179587			1										1	1	1	1	1	1	1	1	0	0	0	0	0		1
WBGene00006974	zen-4	M03D4.1	chrIV	1	6118213	6122066			1										1	1	1	1	1	1	1	1	1	0	0	0	0	1	1	1	1	1		1
WBGene00077651	ZK262.15	ZK262.15	chrV	-1	18437655	18437897				1									1	1	1	1	1	1	1	1	0	0	0	0	0
WBGene00013951	ZK262.4	ZK262.4	chrV	-1	18423855	18424179				1									1	1	1	1	1	1	1	1	0	0	0	0	0
WBGene00044763	ZK688.12	ZK688.12	chrIII	-1	7912701	7913535			1										1	1	1	1	1	1	1	1	0	0	0	0	0
WBGene00014130	ZK892.6	ZK892.6	chrII	-1	9979103	9980017			1										1	1	1	1	1	1	1	1	0	0	0	0	0
WBGene00015775	C14E2.6	C14E2.6	chrX	-1	1827732	1828481		1												1	1	1	1	1	1	1	0	0	0	0	0
WBGene00021895	clec-84	Y54G2A.33	chrIV	1	2842472	2845593		1												1	1	1	1	1	1	1	0	0	0	0	0
WBGene00021149	dnc-3	W10G11.20	chrII	1	3553783	3554623		1												1	1	1	1	1	1	1	1	0	0	0	0		1		1
WBGene00185091	F02H6.71	F02H6.71	chrIV	1	14207539	14208016				1										1	1	1	1	1	1	1	0	0	0	0	0
WBGene00017245	F08D12.1	F08D12.1	chrII	1	2787486	2793950		1												1	1	1	1	1	1	1	0	0	0	0	0		1		1
WBGene00009021	F21D9.8	F21D9.8	chrV	-1	19279302	19279959				1										1	1	1	1	1	1	1	0	0	0	0	0
WBGene00009909	F49H6.8	F49H6.8	chrV	-1	17022346	17022639				1										1	1	1	1	1	1	1	0	0	0	0	0
WBGene00012565	fbxa-210	Y37H2A.5	chrV	1	18125347	18127177	CEOP5577			1										1	1	1	1	1	1	1	0	0	0	0	0		1				1
WBGene00010415	H25K10.6	H25K10.6	chrIV	1	16234294	16236523				1										1	1	1	1	1	1	1	0	0	0	0	0
WBGene00019297	K02B2.6	K02B2.6	chrIV	-1	5961678	5962257			1											1	1	1	1	1	1	1	0	0	0	0	0
WBGene00045100	K03D3.14	K03D3.14	chrIV	1	16331333	16332579				1										1	1	1	1	1	1	1	0	0	0	0	0
WBGene00003417	mrt-2	Y41C4A.14	chrIII	1	11746942	11750072				1										1	1	1	1	1	1	1	0	0	0	0	0		1	1
WBGene00005851	srw-104	R11G11.8	chrV	-1	508113	509804		1												1	1	1	1	1	1	1	0	0	0	0	0
WBGene00077558	T06D10.3	T06D10.3	chrI	-1	9085344	9086219			1											1	1	1	1	1	1	1	0	0	0	0	0
WBGene00022249	Y73B6BL.28	Y73B6BL.28	chrIV	-1	6483197	6483648			1											1	1	1	1	1	1	1	0	0	0	0	0
WBGene00022318	Y82E9BL.1	Y82E9BL.1	chrIII	-1	1354989	1355412		1												1	1	1	1	1	1	1	0	0	0	0	0
WBGene00077655	ZK384.6	ZK384.6	chrV	-1	18728675	18729346				1										1	1	1	1	1	1	1	0	0	0	0	0
WBGene00009270	F30F8.1	F30F8.1	chrI	-1	7832682	7835399			1										1		1	1	1	1	1	1	0	0	0	0	0		1		1		1		1
WBGene00044246	F36D1.10	F36D1.10	chrI	1	11268022	11268401				1									1		1	1	1	1	1	1	0	0	0	0	0
WBGene00019145	H02F09.2	H02F09.2	chrX	1	1573215	1574005		1											1		1	1	1	1	1	1	0	0	0	0	0						1
WBGene00044268	T27E7.10	T27E7.10	chrIV	-1	14531153	14531619				1									1		1	1	1	1	1	1	0	0	0	0	0		1
WBGene00044361	K09F6.11	K09F6.11	chrII	1	2280055	2280585		1													1	1	1	1	1	1	0	0	0	0	0
WBGene00044541	K09H11.11	K09H11.11	chrV	-1	5754444	5755542			1												1	1	1	1	1	1	0	0	0	0	0
WBGene00005332	srh-113	Y68A4A.7	chrV	1	17213018	17214187				1											1	1	1	1	1	1	0	0	0	0	0
WBGene00023172	Y23H5A.8	Y23H5A.8	chrI	1	2633009	2634643		1			1	1									1	1	1	1	1	1	0	0	0	0	0
WBGene00000209	asg-1	K07A12.3	chrI	1	8692938	8693463			1										1	1		1	1	1	1	1	0	0	0	0	0
WBGene00050927	B0250.12	B0250.12	chrV	1	20466407	20468172				1									1	1		1	1	1	1	1	0	0	0	0	0		1
WBGene00015228	B0511.2	B0511.2	chrI	1	10651019	10652951			1										1	1		1	1	1	1	1	1	0	0	0	0
WBGene00010193	btb-20	F57C2.1	chrII	-1	14522310	14523445	CEOP2644			1									1	1		1	1	1	1	1	0	0	0	0	0		1
WBGene00015573	C07G1.7	C07G1.7	chrIV	-1	8210892	8211814			1										1	1		1	1	1	1	1	0	0	0	0	0
WBGene00007852	C31G12.3	C31G12.3	chrV	1	18185182	18185433				1									1	1		1	1	1	1	1	0	0	0	0	0						1
WBGene00016402	C34D4.10	C34D4.10	chrIV	-1	7119988	7121401			1										1	1		1	1	1	1	1	0	0	0	0	0
WBGene00045028	C35D6.11	C35D6.11	chrIV	-1	16348377	16348719				1									1	1		1	1	1	1	1	0	0	0	0	0
WBGene00007965	C36A4.4	C36A4.4	chrIII	-1	3841240	3843598			1										1	1		1	1	1	1	1	0	0	0	1	0		1		1
WBGene00008283	C53D6.6	C53D6.6	chrIV	-1	9027665	9032636			1										1	1		1	1	1	1	1	0	0	0	0	0
WBGene00016985	C56G3.2	C56G3.2	chrX	1	7365521	7366252			1										1	1		1	1	1	1	1	0	0	0	0	0
WBGene00017010	D1007.15	D1007.15	chrI	1	4557665	4563758			1										1	1		1	1	1	1	1	0	0	0	0	0
WBGene00008411	D2030.1	D2030.1	chrI	-1	7567817	7571246			1										1	1		1	1	1	1	1	1	0	0	0	0		1
WBGene00017153	E_BE45912.2	E_BE45912.2	chrIII	-1	1028792	1031145		1											1	1		1	1	1	1	1	0	0	0	0	0		1
WBGene00020652	egg-4	T21E3.1	chrI	1	3932213	3934817			1										1	1		1	1	1	1	1	0	0	0	0	0		1
WBGene00017662	F21D12.2	F21D12.2	chrII	1	7318643	7319112			1										1	1		1	1	1	1	1	0	0	0	0	0
WBGene00009158	F26E4.3	F26E4.3	chrI	-1	9762395	9767860			1										1	1		1	1	1	1	1	0	0	0	0	0			1	1
WBGene00009177	F26H9.5	F26H9.5	chrI	-1	9312636	9314480			1										1	1		1	1	1	1	1	1	0	0	0	0
WBGene00009300	F31F6.1	F31F6.1	chrX	-1	14867032	14868231			1										1	1		1	1	1	1	1	0	0	0	0	0
WBGene00009365	F33H1.4	F33H1.4	chrII	1	10174589	10180128	CEOP2713		1										1	1		1	1	1	1	1	0	0	0	0	0		1		1
WBGene00194955	F37H8.6	F37H8.6	chrII	-1	11176226	11176689			1										1	1		1	1	1	1	1	0	0	0	0	0
WBGene00018190	F38H12.5	F38H12.5	chrV	-1	4081213	4083037		1											1	1		1	1	1	1	1	0	0	0	0	0
WBGene00044533	F41F3.8	F41F3.8	chrV	1	4648818	4650606		1											1	1		1	1	1	1	1	0	0	0	0	0
WBGene00018511	F46F11.8	F46F11.8	chrI	-1	5624605	5626291	CEOP1272		1										1	1		1	1	1	1	1	0	0	0	0	0		1
WBGene00018599	F48C1.6	F48C1.6	chrI	-1	5318228	5319299	CEOP1236		1										1	1		1	1	1	1	1	0	0	0	0	0		1	1
WBGene00018659	F52C6.2	F52C6.2	chrII	1	1926465	1927352	CEOP2056	1											1	1		1	1	1	1	1	0	0	0	1	0		1
WBGene00010012	F53H10.2	F53H10.2	chrV	-1	10852502	10865773			1										1	1		1	1	1	1	1	0	0	1	0	0
WBGene00010061	F54E12.2	F54E12.2	chrIV	-1	11333056	11337162	CEOP4440			1									1	1		1	1	1	1	1	0	0	0	0	1					1
WBGene00019044	F58E1.13	F58E1.13	chrII	-1	1694860	1695833		1											1	1		1	1	1	1	1	0	0	0	0	0
WBGene00019129	F59G1.8	F59G1.8	chrII	1	5906535	5907590	CEOP2232		1										1	1		1	1	1	1	1	1	0	0	0	0					1
WBGene00001391	far-7	K01A2.2	chrII	1	319793	321107		1											1	1		1	1	1	1	1	0	0	0	0	0		1
WBGene00018595	fbxa-145	F48C1.2	chrI	1	5319734	5321126			1										1	1		1	1	1	1	1	0	0	0	0	0		1	1			1
WBGene00022603	gck-2	ZC404.9	chrV	-1	6788433	6792648			1										1	1		1	1	1	1	1	0	0	0	0	0			1
WBGene00014251	gstk-1	ZK1320.1	chrII	1	9656690	9657662			1										1	1		1	1	1	1	1	1	0	0	0	0		1
WBGene00001941	his-67	T23D8.5	chrI	-1	9988336	9988786			1										1	1		1	1	1	1	1	0	0	0	0	0		1	1	1
WBGene00001942	his-68	T23D8.6	chrI	1	9989091	9989605	CEOP1580		1										1	1		1	1	1	1	1	0	0	0	0	0		1	1	1
WBGene00012276	his-74	W05B10.1	chrV	-1	12659688	12660313	CEOP5532		1										1	1		1	1	1	1	1	0	0	0	0	0		1
WBGene00086561	K01A2.12	K01A2.12	chrII	-1	317648	318665		1											1	1		1	1	1	1	1	0	0	0	0	0		1
WBGene00010624	K07A12.7	K07A12.7	chrI	-1	8691036	8692485	CEOP1500		1										1	1		1	1	1	1	1	0	0	0	0	0
WBGene00045036	K08E4.7	K08E4.7	chrIV	1	12075795	12076927				1									1	1		1	1	1	1	1	0	0	0	0	0
WBGene00019574	K09E3.2	K09E3.2	chrX	1	17117585	17117914			1										1	1		1	1	1	1	1	0	0	0	0	0
WBGene00019769	M04F3.3	M04F3.3	chrI	-1	4763242	4765206			1										1	1		1	1	1	1	1	0	0	0	0	0		1		1
WBGene00015248	mai-2	B0546.1	chrIV	1	3385635	3386904		1											1	1		1	1	1	1	1	0	0	0	0	0		1	1	1
WBGene00003592	nfi-1	ZK1290.4	chrII	1	7538146	7542957			1										1	1		1	1	1	1	1	1	0	0	0	0		1	1	1
WBGene00003862	old-1	C08H9.5	chrII	-1	9866589	9868702			1										1	1		1	1	1	1	1	0	0	0	0	0
WBGene00010195	pot-2	F57C2.3	chrII	1	14524098	14525036				1									1	1		1	1	1	1	1	0	0	0	0	0		1				1
WBGene00021988	rgs-8.2	Y59E1A.2	chrX	-1	1943944	1945025		1											1	1		1	1	1	1	1	0	0	0	0	0
WBGene00004509	rrf-2	M01G12.12	chrI	-1	12098659	12105968				1									1	1		1	1	1	1	1	0	0	0	0	0		1	1			1
WBGene00011506	srbc-77	T05G11.2	chrV	1	15930163	15931065				1									1	1		1	1	1	1	1	0	0	0	0	0
WBGene00005261	srh-38	C31B8.11	chrV	-1	2920598	2922692		1											1	1		1	1	1	1	1	0	1	0	0	0
WBGene00015072	srt-69	B0238.8	chrV	-1	5263935	5265760			1										1	1		1	1	1	1	1	0	1	0	0	0
WBGene00005859	srw-112	K12D9.9	chrV	-1	3004139	3006062		1											1	1		1	1	1	1	1	0	0	0	0	0
WBGene00005988	srx-97	F19B10.7	chrII	-1	3667182	3668667		1											1	1		1	1	1	1	1	0	0	0	0	0		1
WBGene00006109	str-44	C42D4.4	chrIV	1	7177175	7178411			1										1	1		1	1	1	1	1	0	0	0	0	0						1
WBGene00006113	str-48	C34D4.8	chrIV	1	7122182	7123935			1										1	1		1	1	1	1	1	0	0	0	0	0
WBGene00020464	T12E12.3	T12E12.3	chrIV	1	5541624	5544740	CEOP4168		1										1	1		1	1	1	1	1	0	0	0	0	0
WBGene00043993	T26G10.6	T26G10.6	chrIII	1	9413377	9414518			1										1	1		1	1	1	1	1	0	0	0	0	0
WBGene00012112	T28A8.6	T28A8.6	chrIII	1	13499103	13501412	CEOP3804			1									1	1		1	1	1	1	1	0	0	0	0	0					1	1
WBGene00013827	Y116F11B.11	Y116F11B.11	chrV	1	19878190	19879995				1									1	1		1	1	1	1	1	0	0	0	0	0		1
WBGene00022475	Y119C1B.10	Y119C1B.10	chrI	-1	4555351	4556812			1										1	1		1	1	1	1	1	0	0	0	0	0
WBGene00012549	Y37D8A.8	Y37D8A.8	chrIII	1	12866968	12867393				1									1	1		1	1	1	1	1	0	0	0	0	0
WBGene00012906	Y46G5A.15	Y46G5A.15	chrII	-1	12782680	12785336				1									1	1		1	1	1	1	1	0	0	0	0	0
WBGene00013210	Y54G9A.7	Y54G9A.7	chrII	-1	13724911	13725814				1									1	1		1	1	1	1	1	0	0	0	0	0		1	1	1
WBGene00175036	Y71A12B.21	Y71A12B.21	chrI	1	13971271	13971407				1									1	1		1	1	1	1	1	0	0	0	0	0
WBGene00013565	Y75B8A.37	Y75B8A.37	chrIII	1	12315378	12315756				1									1	1		1	1	1	1	1	0	0	0	0	0
WBGene00022590	ZC317.7	ZC317.7	chrV	-1	5468669	5470981			1										1	1		1	1	1	1	1	0	0	0	0	0
WBGene00013967	ZK287.7	ZK287.7	chrV	1	9692875	9694783			1										1	1		1	1	1	1	1	0	0	0	0	0
WBGene00014134	ZK896.3	ZK896.3	chrIV	-1	12883483	12886103				1									1	1		1	1	1	1	1	0	0	0	0	0
WBGene00044057	F18A11.7	F18A11.7	chrII	1	13039182	13039724				1										1		1	1	1	1	1	0	0	0	0	0
WBGene00018159	F37F2.2	F37F2.2	chrI	-1	1441668	1444135		1												1		1	1	1	1	1	0	0	0	0	0		1	1	1
WBGene00009913	F49H6.12	F49H6.12	chrV	-1	17020883	17021437				1										1		1	1	1	1	1	0	0	0	0	0
WBGene00001598	glh-1	T21G5.3	chrI	1	6854687	6857536			1											1		1	1	1	1	1	0	0	0	0	0
WBGene00010414	hpa-1	H25K10.5	chrIV	-1	16230420	16233096				1										1		1	1	1	1	1	0	0	0	0	0
WBGene00006434	prdx-2	F09E5.15	chrII	1	5378046	5379619	CEOP2168		1											1		1	1	1	1	1	1	0	0	0	0		1		1
WBGene00004371	rig-4	Y42H9B.2	chrIV	-1	7991396	8004109			1											1		1	1	1	1	1	0	0	0	0	0
WBGene00020225	sre-40	T05A7.8	chrII	-1	4681761	4683725			1											1		1	1	1	1	1	0	0	0	0	0		1
WBGene00005828	srw-81	Y51A2B.7	chrV	1	18398422	18400346				1										1		1	1	1	1	1	0	0	0	0	0		1
WBGene00005961	srx-70	K07C6.15	chrV	-1	3933945	3934935		1												1		1	1	1	1	1	0	0	0	0	0
WBGene00020226	T05A7.9	T05A7.9	chrII	-1	4684493	4684864			1											1		1	1	1	1	1	0	0	0	0	0		1
WBGene00044604	T10F2.5	T10F2.5	chrIII	-1	5158834	5159568	CEOP3260		1											1		1	1	1	1	1	1	0	0	0	0
WBGene00011868	T20G5.4	T20G5.4	chrIII	1	10212305	10214732			1		1									1		1	1	1	1	1	0	0	0	0	0		1
WBGene00012360	tat-3	W09D10.2	chrIII	-1	10722048	10730075			1											1		1	1	1	1	1	1	0	0	0	0		1
WBGene00044000	Y75B8A.41	Y75B8A.41	chrIII	-1	12315775	12316952				1										1		1	1	1	1	1	0	0	0	0	0
WBGene00018667	bath-7	F52C6.10	chrII	-1	1920021	1921109	CEOP2052	1											1			1	1	1	1	1	0	0	0	0	0
WBGene00017740	F23C8.12	F23C8.12	chrI	-1	2451149	2451809		1											1			1	1	1	1	1	0	0	0	0	0
WBGene00017735	F23C8.6	F23C8.6	chrI	-1	2420833	2421744	CEOP1044	1											1			1	1	1	1	1	1	0	0	0	0		1		1
WBGene00015819	fbxc-44	C16A11.6	chrII	-1	4236504	4237752		1											1			1	1	1	1	1	0	0	0	0	0		1		1
WBGene00011061	R06C7.1	R06C7.1	chrI	1	7235382	7238792			1										1			1	1	1	1	1	0	0	0	1	0
WBGene00011062	R06C7.2	R06C7.2	chrI	-1	7233391	7234780	CEOP1376		1										1			1	1	1	1	1	0	0	0	0	0
WBGene00018281	tbc-18	F41D9.1	chrX	1	8378504	8382658			1										1			1	1	1	1	1	0	0	0	0	0
WBGene00045282	Y57G11C.56	Y57G11C.56	chrIV	1	14655442	14655887				1									1			1	1	1	1	1	0	0	0	0	0
WBGene00000180	arc-1	ZK1320.6	chrII	1	9674916	9677146	CEOP2444		1													1	1	1	1	1	0	0	0	0	0
WBGene00016861	C50H11.17	C50H11.17	chrV	-1	3097128	3098686		1														1	1	1	1	1	0	0	0	0	0
WBGene00021902	oxy-4	Y54H5A.4	chrIII	-1	5155422	5158736	CEOP3260		1		1	1										1	1	1	1	1	0	0	0	0	0
WBGene00004287	rac-2	K03D3.10	chrIV	1	16308193	16309797				1												1	1	1	1	1	0	0	0	0	0
WBGene00005443	srh-236	Y68A4A.9	chrV	-1	17210691	17212014				1												1	1	1	1	1	0	0	0	0	0
WBGene00044951	2RSSE.3	2RSSE.3	chrII	-1	15277814	15278499				1									1	1	1		1	1	1	1	0	0	0	0	0
WBGene00001854	hil-3	F22F1.1	chrX	1	8159105	8160037			1					1					1	1	1		1	1	1	1	1	0	0	0	0		1
WBGene00010690	K08H2.3	K08H2.3	chrX	1	13237353	13238408			1					1					1	1	1		1	1	1	1	0	0	0	1	0		1
WBGene00010838	M03C11.1	M03C11.1	chrIII	-1	10393296	10395988			1										1	1	1		1	1	1	1	0	0	0	0	0
WBGene00010859	M04C9.4	M04C9.4	chrI	-1	9355064	9357071			1					1					1	1	1		1	1	1	1	0	0	0	0	0
WBGene00012187	rpb-11	W01G7.3	chrII	1	14059763	14060547	CEOP2624			1									1	1	1		1	1	1	1	1	0	0	0	0		1	1	1
WBGene00004887	smn-1	C41G7.1	chrI	-1	9511182	9512131			1										1	1	1		1	1	1	1	1	0	0	0	0			1	1
WBGene00006601	tpi-1	Y17G7B.7	chrII	-1	12036760	12039077	CEOP2588			1									1	1	1		1	1	1	1	1	0	0	0	0
WBGene00013061	Y51A2A.5	Y51A2A.5	chrV	1	18298778	18300685				1									1	1	1		1	1	1	1	0	0	0	0	0
WBGene00013157	Y53F4B.10	Y53F4B.10	chrII	-1	15001820	15003434				1									1	1	1		1	1	1	1	0	0	0	0	0		1
WBGene00022043	Y65B4BR.8	Y65B4BR.8	chrI	1	534456	535350	CEOP1934	1											1	1	1		1	1	1	1	0	0	0	0	0		1	1		1		1
WBGene00044154	Y7A5A.10	Y7A5A.10	chrX	-1	15793699	15794868			1										1	1	1		1	1	1	1	0	0	0	0	0		1
WBGene00017674	F21F3.4	F21F3.4	chrI	1	4895988	4897542			1										1		1		1	1	1	1	0	0	0	0	0		1
WBGene00004385	rnp-2	K08D10.4	chrIV	1	4172095	4173981	CEOP4116	1											1		1		1	1	1	1	1	0	0	0	0		1		1
WBGene00013613	Y102A5C.4	Y102A5C.4	chrV	1	16922228	16924234				1									1		1		1	1	1	1	0	0	0	0	0
WBGene00012675	Y39B6A.13	Y39B6A.13	chrV	-1	19118482	19119338	CEOP5488			1									1		1		1	1	1	1	0	0	0	0	0		1	1	1
WBGene00013316	Y57G11C.21	Y57G11C.21	chrIV	1	14846353	14847063				1									1		1		1	1	1	1	0	0	0	0	0
WBGene00010015	atad-3	F54B3.3	chrII	1	10248930	10251111	CEOP2714		1										1	1			1	1	1	1	1	0	0	0	0		1		1
WBGene00007173	B0393.8	B0393.8	chrIII	-1	4751843	4752335			1										1	1			1	1	1	1	0	0	0	0	0		1
WBGene00015208	B0495.9	B0495.9	chrII	-1	7707529	7708663	CEOP2308		1										1	1			1	1	1	1	1	0	0	0	0		1
WBGene00015012	bath-20	B0047.1	chrII	-1	2040276	2041620		1											1	1			1	1	1	1	0	0	0	0	0						1
WBGene00015506	C06A5.10	C06A5.10	chrI	-1	5982521	5982971			1										1	1			1	1	1	1	0	0	0	0	0
WBGene00007978	C36B1.11	C36B1.11	chrI	-1	8755837	8757599			1										1	1			1	1	1	1	0	0	0	0	0		1
WBGene00008003	C38D4.1	C38D4.1	chrIII	-1	4783162	4785227			1										1	1			1	1	1	1	0	0	0	0	0	1	1	1	1	1	1	1	1
WBGene00010351	cbd-1	H02I12.1	chrIV	1	11372967	11377578				1									1	1			1	1	1	1	0	0	0	0	0		1
WBGene00000549	cls-2	R107.6	chrIII	1	9054974	9058804	CEOP3572		1										1	1			1	1	1	1	1	0	0	0	0		1		1
WBGene00000730	col-157	T11F9.9	chrV	1	11484036	11484980			1										1	1			1	1	1	1	0	0	0	0	0
WBGene00001153	ech-4	R06F6.9	chrII	1	10820970	10822635			1										1	1			1	1	1	1	0	0	1	0	0				1
WBGene00077557	F15D3.9	F15D3.9	chrI	1	11557977	11558636				1									1	1			1	1	1	1	0	0	0	0	0		1
WBGene00043279	F22D6.8	F22D6.8	chrI	-1	7098976	7099704			1										1	1			1	1	1	1	0	0	0	0	0		1
WBGene00009054	F22D6.9	F22D6.9	chrI	1	7099830	7101760			1										1	1			1	1	1	1	0	0	0	0	0		1				1
WBGene00017751	F23F12.3	F23F12.3	chrIII	1	6500406	6507664	CEOP3855		1										1	1			1	1	1	1	0	0	0	0	0
WBGene00017868	F27E11.2	F27E11.2	chrV	1	3459716	3462998		1											1	1			1	1	1	1	0	0	0	0	0
WBGene00043068	F32E10.9	F32E10.9	chrIV	-1	7562185	7563299			1										1	1			1	1	1	1	0	0	0	0	0
WBGene00043049	F32H2.11	F32H2.11	chrI	-1	8958054	8960882			1										1	1			1	1	1	1	0	0	0	0	0
WBGene00018762	F53E10.6	F53E10.6	chrV	-1	2601690	2603063		1											1	1			1	1	1	1	0	0	0	0	0		1	1
WBGene00018806	F54D10.5	F54D10.5	chrII	-1	3807098	3808225	CEOP2110	1											1	1			1	1	1	1	0	0	0	0	0		1	1	1	1	1	1	1
WBGene00010298	F59A1.12	F59A1.12	chrV	-1	17664732	17667750				1				1					1	1			1	1	1	1	0	0	0	0	0
WBGene00012485	fbxa-121	Y18D10A.18	chrI	-1	12906452	12907744				1									1	1			1	1	1	1	0	0	0	0	0
WBGene00001831	hcp-3	F58A4.3	chrIII	-1	9615223	9616386			1										1	1			1	1	1	1	1	0	0	0	0		1	1	1	1		1
WBGene00010477	K01G5.3	K01G5.3	chrIII	1	10750367	10751795	CEOP3842		1										1	1			1	1	1	1	0	0	0	0	0	1				1	1
WBGene00010542	K03H1.7	K03H1.7	chrIII	1	9946984	9948017			1										1	1			1	1	1	1	0	0	0	0	0	1	1	1	1
WBGene00019484	K07D4.4	K07D4.4	chrII	-1	4031170	4032651		1											1	1			1	1	1	1	0	0	0	0	0
WBGene00023497	lin-15B	ZK662.4	chrX	1	15726061	15731957	CEOPX140		1										1	1			1	1	1	1	0	0	0	0	0	1	1		1
WBGene00003210	mel-28	C38D4.3	chrIII	1	4786043	4792358	CEOP3220		1										1	1			1	1	1	1	1	0	0	0	0		1	1	1	1	1	1	1
WBGene00003222	mes-4	Y2H9A.1	chrV	-1	13433040	13437533			1										1	1			1	1	1	1	0	0	0	0	0		1	1	1	1	1	1	1
WBGene00003792	npp-6	F56A3.3	chrI	1	5176469	5182804	CEOP1224		1										1	1			1	1	1	1	1	0	0	0	0		1	1	1
WBGene00020417	nuo-2	T10E9.7	chrI	-1	6530131	6533032			1										1	1			1	1	1	1	1	0	0	0	0
WBGene00011638	ostb-1	T09A5.11	chrII	1	7864022	7866207			1										1	1			1	1	1	1	0	0	0	0	0	1	1	1	1
WBGene00020397	pcbd-1	T10B11.1	chrI	1	6951134	6951972			1										1	1			1	1	1	1	0	0	0	0	0		1
WBGene00011939	prmt-3	T23B5.1	chrIV	-1	12677373	12684357				1									1	1			1	1	1	1	0	0	0	0	0		1	1
WBGene00011069	R06F6.6	R06F6.6	chrII	1	10805335	10809933			1										1	1			1	1	1	1	0	0	0	0	0		1		1
WBGene00011071	R06F6.8	R06F6.8	chrII	-1	10812888	10819919			1										1	1			1	1	1	1	0	0	0	0	0				1
WBGene00011155	R09B3.2	R09B3.2	chrI	-1	11909347	11910095	CEOP1656			1									1	1			1	1	1	1	0	0	0	0	0	1	1	1	1
WBGene00004798	sip-1	F43D9.4	chrIII	-1	10506008	10506703			1										1	1			1	1	1	1	0	0	0	0	0			1	1		1		1
WBGene00004955	spd-5	F56A3.4	chrI	-1	5171288	5175525			1										1	1			1	1	1	1	0	0	0	0	0		1	1	1
WBGene00005149	sre-1	B0495.1	chrII	1	7709736	7711391			1										1	1			1	1	1	1	0	0	0	0	0		1
WBGene00005490	srh-286	Y59A8A.4	chrV	-1	17841457	17844180				1									1	1			1	1	1	1	0	0	0	0	0
WBGene00005494	srh-290	C47A10.11	chrV	1	17790465	17792444				1			1						1	1			1	1	1	1	0	0	0	0	0
WBGene00011333	T01E8.5	T01E8.5	chrII	-1	10242533	10247580	CEOP2472		1										1	1			1	1	1	1	0	0	0	0	0		1		1
WBGene00011714	T11F9.13	T11F9.13	chrV	-1	11482339	11482999			1										1	1			1	1	1	1	0	0	0	0	0
WBGene00020761	T24C4.5	T24C4.5	chrIII	-1	877431	879567		1											1	1			1	1	1	1	0	0	0	0	0	1	1		1
WBGene00006390	taf-8	ZK1320.12	chrII	1	9669265	9671440	CEOP2444		1										1	1			1	1	1	1	0	0	0	0	0
WBGene00011216	usp-46	R10E11.3	chrIII	1	9776446	9778763			1										1	1			1	1	1	1	0	0	0	0	0		1	1	1
WBGene00006916	vha-7	C26H9A.1	chrIV	1	12640424	12650629				1									1	1			1	1	1	1	0	0	0	0	0	1	1				1
WBGene00021199	Y17G9B.2	Y17G9B.2	chrIV	1	4764193	4764542	CEOP4634		1										1	1			1	1	1	1	0	0	0	0	0		1
WBGene00077458	Y39B6A.50	Y39B6A.50	chrV	1	19089606	19089782				1									1	1			1	1	1	1	0	0	0	0	0		1
WBGene00044344	Y46H3A.7	Y46H3A.7	chrV	1	1821576	1823095		1											1	1			1	1	1	1	1	0	0	0	0		1	1	1
WBGene00014258	ZK1320.9	ZK1320.9	chrII	-1	9684037	9686661			1										1	1			1	1	1	1	0	0	0	0	0			1	1
WBGene00014059	ZK673.3	ZK673.3	chrII	1	10450598	10451943	CEOP2488		1										1	1			1	1	1	1	0	0	0	0	0
WBGene00013966	ztf-9	ZK287.6	chrV	-1	9691013	9692135			1					1					1	1			1	1	1	1	0	0	0	0	0
WBGene00007085	AH10.4	AH10.4	chrV	-1	14137333	14137845			1											1			1	1	1	1	0	0	0	0	0
WBGene00000474	cey-3	M01E11.5	chrI	-1	5571787	5572976	CEOP1974		1											1			1	1	1	1	0	0	0	1	0
WBGene00001898	his-24	M163.3	chrX	1	14490037	14491045			1					1						1			1	1	1	1	0	0	1	0	0		1
WBGene00019712	M01E11.3	M01E11.3	chrI	1	5573210	5576750			1											1			1	1	1	1	0	0	0	0	0						1
WBGene00011628	T08G5.9	T08G5.9	chrV	-1	14045431	14046306			1											1			1	1	1	1	0	0	0	0	0		1
WBGene00020444	T12B3.1	T12B3.1	chrIV	1	7382404	7384741			1											1			1	1	1	1	0	0	0	0	0
WBGene00012701	Y39B6A.43	Y39B6A.43	chrV	-1	18960938	18967794	CEOP5476			1	1			1						1			1	1	1	1	0	0	0	0	0		1	1	1
WBGene00194815	Y43F8B.23	Y43F8B.23	chrV	-1	19465825	19466818				1										1			1	1	1	1	0	0	0	0	0		1
WBGene00021927	Y55F3AM.10	Y55F3AM.10	chrIV	-1	1027754	1030024		1												1			1	1	1	1	0	0	0	0	0		1		1
WBGene00077652	ZK228.12	ZK228.12	chrV	1	18466478	18467688				1										1			1	1	1	1	0	0	0	0	0		1
WBGene00018360	F42G8.9	F42G8.9	chrIV	1	8115754	8118431			1										1				1	1	1	1	0	0	0	0	0
WBGene00008569	fbxa-101	F08A8.7	chrI	-1	12958628	12959944	CEOP1680			1									1				1	1	1	1	0	0	0	0	0		1				1
WBGene00004090	ppp-1	C15F1.4	chrII	-1	6965758	6967606	CEOP2268		1										1				1	1	1	1	0	0	0	0	0		1		1
WBGene00017778	psf-1	F25B5.7	chrIII	-1	5953477	5958197			1										1				1	1	1	1	1	0	0	0	0		1	1	1		1		1
WBGene00011338	sec-31	T01G1.3	chrIV	-1	11365596	11371772				1									1				1	1	1	1	0	0	0	0	0		1	1
WBGene00016151	smc-5	C27A2.1	chrII	1	5062121	5067121			1										1				1	1	1	1	1	0	0	0	0		1	1	1	1		1
WBGene00020625	T20F5.3	T20F5.3	chrI	-1	3909631	3910547			1										1				1	1	1	1	0	0	0	0	0			1	1
WBGene00012233	W04A4.4	W04A4.4	chrI	-1	13676243	13677780				1									1				1	1	1	1	0	0	0	0	0
WBGene00043952	ZC404.2	ZC404.2	chrV	1	6787944	6788432			1										1				1	1	1	1	0	0	0	0	0
WBGene00015503	C06A5.5	C06A5.5	chrI	-1	5981818	5982454			1														1	1	1	1	0	0	0	0	0
WBGene00007487	C09G1.5	C09G1.5	chrX	1	15959029	15962250			1														1	1	1	1	0	0	0	0	0		1
WBGene00018342	F42A10.6	F42A10.6	chrIII	-1	6176095	6176811			1														1	1	1	1	0	0	0	0	0
WBGene00001501	ftn-2	D1037.3	chrI	-1	3680181	3680947			1														1	1	1	1	1	0	0	0	0
WBGene00019429	K06A5.1	K06A5.1	chrI	1	6473209	6477148			1			1											1	1	1	1	0	0	0	0	0		1
WBGene00021511	Y41D4B.1	Y41D4B.1	chrIV	1	1672705	1675932		1															1	1	1	1	0	0	0	0	0
WBGene00013208	Y54G9A.5	Y54G9A.5	chrII	1	13722894	13724939				1	1												1	1	1	1	0	0	0	1	0		1	1	1	1	1	1	1
WBGene00022016	Y61A9LA.4	Y61A9LA.4	chrV	1	4560828	4561669		1															1	1	1	1	0	0	0	0	0						1
WBGene00000460	ceh-39	T26C11.7	chrX	-1	1853865	1856166	CEOPX024	1											1	1	1	1		1	1	1	0	0	0	0	0			1
WBGene00005389	srh-173	Y60A3A.4	chrV	1	19973253	19975032				1									1	1	1	1		1	1	1	0	0	0	0	0
WBGene00020179	T02H6.9	T02H6.9	chrII	1	679032	679721		1											1	1	1	1		1	1	1	0	0	0	0	0
WBGene00011464	T05B9.1	T05B9.1	chrII	-1	11260020	11261192			1										1	1	1	1		1	1	1	0	0	0	0	0
WBGene00016478	srt-72	C36C5.9	chrV	-1	3148213	3149487		1												1	1	1		1	1	1	0	0	0	0	0
WBGene00010932	M162.6	M162.6	chrV	1	19787008	19787196				1									1		1	1		1	1	1	0	0	0	0	0						1
WBGene00050911	Y43F8B.18	Y43F8B.18	chrV	1	19485960	19486700				1											1	1		1	1	1	0	0	0	0	0
WBGene00050900	ZK228.11	ZK228.11	chrV	1	18455327	18455906				1											1	1		1	1	1	0	0	0	0	0
WBGene00018852	F55A3.7	F55A3.7	chrI	-1	10785117	10787852			1										1	1		1		1	1	1	0	0	0	0	0	1
WBGene00011435	T04D3.8	T04D3.8	chrI	1	13309983	13310704				1									1	1		1		1	1	1	0	0	0	0	0
WBGene00011804	T16G12.3	T16G12.3	chrIII	1	10051976	10052984			1										1	1		1		1	1	1	0	0	0	0	0		1				1
WBGene00012267	W04G5.7	W04G5.7	chrI	1	11652780	11654245				1									1	1		1		1	1	1	0	0	0	0	0
WBGene00008194	C49C3.4	C49C3.4	chrIV	1	17320758	17328626				1	1				1					1		1		1	1	1	0	0	0	0	0
WBGene00005704	sru-41	Y51H7BR.6	chrII	-1	1520391	1521849		1												1		1		1	1	1	0	0	0	0	0		1
WBGene00013371	Y60A9A.1	Y60A9A.1	chrX	-1	14376885	14377260			1											1		1		1	1	1	0	0	0	0	0
WBGene00020974	W03B1.5	W03B1.5	chrIV	1	4348439	4351841			1										1			1		1	1	1	0	0	0	0	0		1
WBGene00194676	Y43F8B.21	Y43F8B.21	chrV	1	19487288	19487751				1												1		1	1	1	0	0	0	0	0
WBGene00009076	F23B2.8	F23B2.8	chrIV	1	9152092	9152402			1										1		1			1	1	1	0	0	0	0	0
WBGene00010293	fbxa-108	F59A1.7	chrV	-1	17656819	17658174				1				1					1		1			1	1	1	0	0	0	0	0		1				1
WBGene00009647	F43C1.1	F43C1.1	chrIII	1	4210536	4216679			1										1	1				1	1	1	0	0	0	0	0
WBGene00019524	K08D9.2	K08D9.2	chrV	1	3227794	3230126		1											1	1				1	1	1	0	0	0	0	0		1
WBGene00002226	klp-16	C41G7.2	chrI	1	9512444	9514747			1										1	1				1	1	1	0	0	0	0	0			1	1
WBGene00011268	R17.2	R17.2	chrIII	-1	10839913	10844836			1										1	1				1	1	1	0	0	0	0	0			1	1
WBGene00011712	T11F9.10	T11F9.10	chrV	1	11487134	11488257			1										1	1				1	1	1	0	0	0	0	0
WBGene00012192	W02A11.1	W02A11.1	chrI	-1	12730013	12732717	CEOP1676			1									1	1				1	1	1	1	0	0	0	0		1	1	1
WBGene00021894	Y54G2A.32	Y54G2A.32	chrIV	1	2803587	2804797		1					1						1	1				1	1	1	0	0	0	0	0
WBGene00013306	Y57G11C.8	Y57G11C.8	chrIV	1	14781805	14783363				1									1	1				1	1	1	0	0	0	0	0		1
WBGene00008177	C48D1.1	C48D1.1	chrIV	-1	13193643	13197358				1										1				1	1	1	0	0	0	0	0
WBGene00012961	Y47H10A.5	Y47H10A.5	chrI	-1	12095726	12097930				1										1				1	1	1	0	0	0	0	0					1	1
WBGene00175025	F14E5.7	F14E5.7	chrII	-1	8419897	8420105			1										1					1	1	1	0	0	0	0	0
WBGene00195147	F14E5.8	F14E5.8	chrII	1	8420707	8422152			1										1					1	1	1	0	0	0	0	0
WBGene00017548	F18A1.7	F18A1.7	chrII	-1	7662653	7663706	CEOP2668		1										1					1	1	1	0	0	0	0	0			1	1		1		1
WBGene00017546	rpa-1	F18A1.5	chrII	1	7664532	7667061			1										1					1	1	1	1	0	0	0	0			1	1
WBGene00012146	VB0393L.2	VB0393L.2	chrIII	1	4749759	4750251			1										1					1	1	1	0	0	0	0	0
WBGene00021035	W05F2.3	W05F2.3	chrI	-1	3367641	3368554		1						1					1					1	1	1	0	0	0	1	0		1
WBGene00003246	mig-14	R06B9.6	chrII	1	13741673	13749911				1	1													1	1	1	1	0	0	0	0		1		1
WBGene00021248	Y22D7AL.10	Y22D7AL.10	chrIII	-1	1617144	1618945		1																1	1	1	1	0	0	0	0		1	1	1
WBGene00022111	Y71F9AL.6	Y71F9AL.6	chrI	1	2890448	2891263		1																1	1	1	0	0	0	0	0
WBGene00019140	bath-3	F59H6.10	chrII	-1	2029238	2030468	CEOP2060	1											1	1	1	1	1		1	1	0	0	0	0	0
WBGene00044127	BE10.5	BE10.5	chrIII	-1	12806109	12806754				1									1	1	1	1	1		1	1	0	0	0	0	0		1
WBGene00007860	C32A3.3	C32A3.3	chrIII	1	3636028	3643654		1											1	1	1	1	1		1	1	1	0	0	0	0		1		1
WBGene00016507	C37H5.3	C37H5.3	chrV	1	4844671	4846941		1											1	1	1	1	1		1	1	0	0	1	0	0						1
WBGene00017532	F16H11.3	F16H11.3	chrX	-1	4647496	4649167			1										1	1	1	1	1		1	1	0	0	0	0	0
WBGene00017708	F22E5.9	F22E5.9	chrII	1	2638327	2639113		1											1	1	1	1	1		1	1	0	0	0	1	0			1	1
WBGene00017979	F32B5.6	F32B5.6	chrI	1	2668162	2672431		1											1	1	1	1	1		1	1	0	0	0	0	0
WBGene00018661	F52C6.4	F52C6.4	chrII	1	1922871	1924262	CEOP2056	1											1	1	1	1	1		1	1	0	0	0	0	0
WBGene00023289	F53A3.5	F53A3.5	chrIII	1	1934438	1936186		1											1	1	1	1	1		1	1	0	0	0	0	0		1
WBGene00010245	F58D5.6	F58D5.6	chrI	1	12034063	12037221				1									1	1	1	1	1		1	1	0	0	0	0	0
WBGene00012566	fbxa-211	Y37H2A.6	chrV	1	18127659	18128853	CEOP5577			1									1	1	1	1	1		1	1	0	0	0	0	0
WBGene00002368	let-99	K08E7.3	chrIV	1	12567833	12570601				1									1	1	1	1	1		1	1	0	0	0	1	0		1
WBGene00020977	oac-52	W03B1.8	chrIV	-1	4342023	4346551			1										1	1	1	1	1		1	1	0	0	0	0	0
WBGene00007835	oac-7	C31A11.7	chrV	1	16309785	16314732				1									1	1	1	1	1		1	1	0	0	0	0	0		1
WBGene00011910	T22B3.2	T22B3.2	chrIV	1	11704228	11708214				1									1	1	1	1	1		1	1	0	0	0	0	0
WBGene00020960	W02H5.5	W02H5.5	chrV	-1	2618489	2618950		1											1	1	1	1	1		1	1	0	0	0	0	0		1
WBGene00022453	Y110A2AR.3	Y110A2AR.3	chrII	-1	2913715	2919318	CEOP2076	1								1			1	1	1	1	1		1	1	1	0	0	0	0		1	1	1
WBGene00194744	Y38H6C.25	Y38H6C.25	chrV	1	20519196	20520031				1									1	1	1	1	1		1	1	0	0	0	0	0
WBGene00012716	Y39E4B.5	Y39E4B.5	chrIII	1	13169817	13173005				1						1			1	1	1	1	1		1	1	1	0	0	0	1	1		1		1	1	1
WBGene00194693	Y60A3A.31	Y60A3A.31	chrV	-1	19985246	19986282				1									1	1	1	1	1		1	1	0	0	0	0	0
WBGene00014947	Y71A12B.14	Y71A12B.14	chrI	1	13969832	13970865				1									1	1	1	1	1		1	1	0	0	0	0	0		1
WBGene00194930	Y73F8A.1159	Y73F8A.1159	chrIV	-1	15390870	15390995				1									1	1	1	1	1		1	1	0	0	0	0	0
WBGene00022667	ZK154.5	ZK154.5	chrX	-1	7783136	7787884			1										1	1	1	1	1		1	1	0	0	0	0	0		1
WBGene00008354	D1025.2	D1025.2	chrX	-1	14514046	14515011			1											1	1	1	1		1	1	0	0	0	0	0
WBGene00008442	E01B7.2	E01B7.2	chrV	1	17921758	17924164	CEOP5582			1										1	1	1	1		1	1	0	0	0	0	0		1	1	1
WBGene00189944	E03A3.10	E03A3.10	chrIII	1	4049473	4051246			1											1	1	1	1		1	1	0	0	0	0	0
WBGene00044363	F22E5.21	F22E5.21	chrII	-1	2635365	2637613		1												1	1	1	1		1	1	0	0	0	0	0			1	1
WBGene00045075	W04G5.12	W04G5.12	chrI	1	11646516	11647011				1										1	1	1	1		1	1	0	0	0	0	0
WBGene00013275	btb-14	Y57A10B.3	chrII	1	12383405	12384628				1									1		1	1	1		1	1	0	0	0	0	0
WBGene00015238	B0511.13	B0511.13	chrI	-1	10633179	10636006	CEOP1632		1							1					1	1	1		1	1	0	0	0	0	0	1	1
WBGene00017000	D1005.6	D1005.6	chrX	-1	1463110	1464415		1													1	1	1		1	1	0	0	0	0	0
WBGene00017701	F22D3.5	F22D3.5	chrII	-1	6938541	6938825			1												1	1	1		1	1	0	0	0	0	0		1
WBGene00023413	H31B20.2	H31B20.2	chrI	1	8172715	8173483			1												1	1	1		1	1	0	0	0	0	0
WBGene00195183	R04A9.9	R04A9.9	chrX	-1	389518	390568		1													1	1	1		1	1	0	0	0	0	0
WBGene00021257	Y22D7AR.3	Y22D7AR.3	chrIII	-1	1665484	1665784		1													1	1	1		1	1	0	0	0	0	0		1
WBGene00013285	dct-12	Y57A10C.7	chrII	-1	12430724	12432247				1									1	1		1	1		1	1	0	0	0	0	0		1
WBGene00018804	F54D10.3	F54D10.3	chrII	1	3812297	3813523		1											1	1		1	1		1	1	0	0	0	0	0						1
WBGene00012623	fbxa-149	Y38H6C.10	chrV	-1	20516267	20518005				1									1	1		1	1		1	1	0	0	0	0	0
WBGene00010555	K04C1.5	K04C1.5	chrX	1	14247983	14249779			1										1	1		1	1		1	1	0	0	0	0	0
WBGene00010599	K06B4.4	K06B4.4	chrV	1	15669151	15670138				1									1	1		1	1		1	1	0	0	0	0	0
WBGene00003014	lin-28	F02E9.2	chrI	-1	8407625	8410798			1										1	1		1	1		1	1	0	0	0	0	0		1			1
WBGene00004896	smu-2	Y49F6B.4	chrII	1	3482439	3490142		1											1	1		1	1		1	1	1	0	0	0	0			1	1
WBGene00005430	srh-220	F47C12.5	chrIV	-1	3976423	3978009		1											1	1		1	1		1	1	0	0	0	0	0
WBGene00012210	W02D9.4	W02D9.4	chrI	-1	12537981	12538945				1									1	1		1	1		1	1	0	0	0	1	0		1
WBGene00021535	wht-7	Y42G9A.6	chrIII	-1	6141913	6149538			1										1	1		1	1		1	1	0	0	0	0	0		1
WBGene00015456	C04G6.6	C04G6.6	chrII	-1	5099429	5100233			1											1		1	1		1	1	0	0	0	0	0
WBGene00010295	fbxa-193	F59A1.9	chrV	-1	17653456	17655255	CEOP5460			1						1				1		1	1		1	1	0	0	0	0	0		1				1
WBGene00021811	ral-1	Y53G8AR.3	chrIII	1	3311454	3317836		1												1		1	1		1	1	1	0	0	0	0	1	1	1	1
WBGene00018559	srt-37	F47D2.8	chrV	-1	4279834	4283584		1												1		1	1		1	1	0	1	0	0	0
WBGene00022451	Y110A2AM.4	Y110A2AM.4	chrII	-1	2900052	2901323	CEOP2072	1												1		1	1		1	1	0	0	0	0	0		1
WBGene00006049	ssp-32	F32B6.7	chrIV	1	9895386	9896131			1										1			1	1		1	1	0	0	0	0	0
WBGene00011466	T05C12.1	T05C12.1	chrII	1	8173628	8174810			1										1			1	1		1	1	0	0	0	0	0
WBGene00011467	T05C12.3	T05C12.3	chrII	-1	8172178	8173487			1										1			1	1		1	1	0	0	0	0	0
WBGene00008528	F02E9.1	F02E9.1	chrI	1	8406837	8407641			1													1	1		1	1	0	0	0	0	0			1	1
WBGene00008529	F02E9.3	F02E9.3	chrI	-1	8404541	8405949			1													1	1		1	1	0	0	0	0	0			1	1
WBGene00017597	F19C7.8	F19C7.8	chrIV	-1	4610568	4624110			1													1	1		1	1	0	0	0	0	0
WBGene00004903	snf-4	Y46G5A.25	chrII	-1	12832846	12835755				1			1									1	1		1	1	0	0	0	0	0
WBGene00013436	Y66D12A.10	Y66D12A.10	chrIII	1	11565734	11567909	CEOP3723			1												1	1		1	1	0	0	0	0	0			1	1
WBGene00008594	clec-57	F08H9.6	chrV	1	14469202	14472440			1										1	1	1		1		1	1	0	0	0	0	0
WBGene00023515	srz-97	F08H9.12	chrV	-1	14465025	14468231			1										1	1	1		1		1	1	0	0	0	0	0
WBGene00020676	T22B11.2	T22B11.2	chrIV	1	4688544	4691926			1										1		1		1		1	1	0	0	0	0	0
WBGene00138718	E02A10.5	E02A10.5	chrV	1	12579655	12582183			1												1		1		1	1	0	0	0	0	0
WBGene00021274	Y23H5B.3	Y23H5B.3	chrI	1	2544751	2546190		1													1		1		1	1	0	0	0	0	0
WBGene00021529	Y41G9A.5	Y41G9A.5	chrX	1	2946657	2949125			1					1		1					1		1		1	1	0	0	0	0	0
WBGene00015013	btb-3	B0047.2	chrII	-1	2043028	2044109		1					1	1					1	1			1		1	1	0	0	0	0	0						1
WBGene00017001	D1007.3	D1007.3	chrI	-1	4575443	4577201			1										1	1			1		1	1	0	0	0	0	0
WBGene00010074	F54G8.1	F54G8.1	chrIII	1	9155038	9157087			1										1	1			1		1	1	0	0	0	0	0
WBGene00003597	nhl-1	F54G8.4	chrIII	-1	9147312	9153812			1										1	1			1		1	1	0	0	0	0	0
WBGene00006730	uev-1	F39B2.2	chrI	1	14790233	14790928	CEOP1764			1									1	1			1		1	1	1	0	0	0	0			1	1
WBGene00021108	W09B7.3	W09B7.3	chrV	-1	8823235	8825379			1										1	1			1		1	1	0	0	0	0	0
WBGene00013556	Y75B8A.23	Y75B8A.23	chrIII	1	12250528	12250889				1									1	1			1		1	1	0	0	0	0	0		1	1	1		1		1
WBGene00018645	F49F1.5	F49F1.5	chrIV	-1	4119454	4120391		1												1			1		1	1	0	0	0	0	0						1
WBGene00003720	nhr-130	T01G6.8	chrV	-1	480841	483349		1												1			1		1	1	0	0	0	0	0
WBGene00020594	ugt-10	T19H12.11	chrV	-1	4898203	4900068		1												1			1		1	1	0	0	0	0	0						1
WBGene00007513	wht-2	C10C6.5	chrIV	1	11470163	11473395				1										1			1		1	1	0	0	0	0	0
WBGene00012552	Y37D8A.12	Y37D8A.12	chrIII	1	12878414	12880598				1										1			1		1	1	0	0	0	0	0		1		1
WBGene00007515	C10C6.7	C10C6.7	chrIV	-1	11465407	11467331				1									1				1		1	1	0	0	0	0	0
WBGene00045175	C10C6.9	C10C6.9	chrIV	1	11467994	11469022				1									1				1		1	1	0	0	0	0	0
WBGene00010215	nhr-193	F57G8.6	chrV	1	16342477	16344255				1									1				1		1	1	0	0	0	0	0
WBGene00022452	Y110A2AR.1	Y110A2AR.1	chrII	1	2919719	2920850		1					1	1					1				1		1	1	0	0	0	0	1		1	1	1	1		1
WBGene00013781	Y116A8B.4	Y116A8B.4	chrIV	1	17223743	17224951				1									1				1		1	1	0	0	0	0	0
WBGene00016464	C36B7.1	C36B7.1	chrX	1	7112846	7114820			1														1		1	1	0	0	0	0	0
WBGene00011749	T13F2.12	T13F2.12	chrIV	-1	9765654	9766330			1														1		1	1	0	0	0	0	0
WBGene00013256	Y57A10A.13	Y57A10A.13	chrII	-1	12176816	12184808				1	1	1	1										1		1	1	0	0	0	0	0		1	1	1
WBGene00008882	F16B12.6	F16B12.6	chrX	1	14102290	14107846			1										1	1	1	1			1	1	1	0	0	0	0			1	1
WBGene00017849	F27B3.7	F27B3.7	chrIII	-1	6562969	6563691			1										1	1	1	1			1	1	0	0	0	0	0
WBGene00018813	F54D11.3	F54D11.3	chrV	-1	4635514	4637000		1											1	1	1	1			1	1	0	0	0	0	0
WBGene00002224	klp-13	F22F4.3	chrX	1	5984940	5992068			1										1	1	1	1			1	1	0	0	0	0	0			1	1
WBGene00020955	W02G9.5	W02G9.5	chrV	1	2658031	2660775		1											1	1	1	1			1	1	0	0	0	0	0		1		1	1
WBGene00194949	Y10G11A.90	Y10G11A.90	chrIV	1	16417086	16417384				1									1	1	1	1			1	1	0	0	0	0	0
WBGene00044345	Y48G1C.12	Y48G1C.12	chrI	1	47472	49819	CEOP1971	1											1	1	1	1			1	1	0	0	0	0	0		1		1
WBGene00016302	fbxc-7	C32B5.9	chrII	1	954055	956344		1												1	1	1			1	1	0	0	0	0	0
WBGene00004357	rho-1	Y51H4A.3	chrIV	-1	16482743	16488988				1										1	1	1			1	1	1	0	0	0	0		1
WBGene00020741	T23F4.3	T23F4.3	chrII	-1	1169551	1172116		1			1									1	1	1			1	1	0	0	0	0	0		1
WBGene00015570	C07F11.2	C07F11.2	chrI	1	420925	423721		1											1		1	1			1	1	0	0	0	0	0
WBGene00005194	srg-37	K04C1.1	chrX	-1	14233875	14235216			1												1	1			1	1	0	0	0	0	0
WBGene00012211	W02D9.5	W02D9.5	chrI	-1	12561030	12561550				1											1	1			1	1	0	0	0	0	0
WBGene00021995	Y59E9AL.5	Y59E9AL.5	chrIV	-1	5221877	5222225			1												1	1			1	1	0	0	0	0	0
WBGene00016300	C32B5.7	C32B5.7	chrII	1	960535	964288		1											1	1		1			1	1	0	0	0	0	0
WBGene00001091	drh-2	C01B10.1	chrIV	-1	6613907	6618487	CEOP4647		1										1	1		1			1	1	0	0	0	0	0
WBGene00020443	esyt-2	T12A2.15	chrIII	-1	6224378	6229351			1										1	1		1			1	1	0	0	0	0	0		1	1	1
WBGene00017990	F32E10.2	F32E10.2	chrIV	1	7576170	7577315			1										1	1		1			1	1	1	0	0	0	0
WBGene00018849	F55A3.3	F55A3.3	chrI	1	10789117	10793136	CEOP1648		1										1	1		1			1	1	0	0	0	0	0
WBGene00010112	nhr-191	F55D12.3	chrI	1	7896120	7897720			1										1	1		1			1	1	0	0	0	0	0
WBGene00005559	sri-47	F22E5.4	chrII	1	2656911	2658263		1											1	1		1			1	1	0	1	0	0	0
WBGene00044257	Y45F10D.16	Y45F10D.16	chrIV	1	13776391	13777125				1									1	1		1			1	1	0	0	0	0	0
WBGene00021803	Y53G8AM.2	Y53G8AM.2	chrIII	1	3271813	3272034		1											1	1		1			1	1	0	0	0	0	0				1
WBGene00022091	Y69A2AR.20	Y69A2AR.20	chrIV	-1	2485385	2486369		1											1	1		1			1	1	0	0	0	0	0
WBGene00023483	Y75B8A.39	Y75B8A.39	chrIII	1	12313186	12314302				1									1	1		1			1	1	0	0	0	0	0
WBGene00020220	clec-140	T05A7.2	chrII	1	4674470	4675726			1											1		1			1	1	0	0	0	0	0
WBGene00017630	F20B6.6	F20B6.6	chrX	-1	4201626	4202190			1											1		1			1	1	0	0	0	0	0
WBGene00009113	F25D7.4	F25D7.4	chrI	-1	10418225	10422468			1											1		1			1	1	0	0	0	0	0		1		1
WBGene00010217	sre-31	F57G9.1	chrII	-1	12406758	12408753				1										1		1			1	1	0	1	0	0	0
WBGene00012725	sre-47	Y39G8B.4	chrII	-1	13983323	13984577				1										1		1			1	1	0	0	0	0	0
WBGene00018552	srt-19	F47D2.1	chrV	1	4285023	4287189		1												1		1			1	1	0	0	0	0	0
WBGene00005876	srw-129	C44C3.2	chrV	1	2971947	2973483		1												1		1			1	1	0	0	0	0	0
WBGene00012104	T27F6.4	T27F6.4	chrI	1	12484171	12486450	CEOP1668			1	1		1							1		1			1	1	0	0	0	0	0		1
WBGene00013528	Y73F8A.23	Y73F8A.23	chrIV	-1	15442928	15444549				1										1		1			1	1	0	0	0	0	0
WBGene00022634	ZC581.7	ZC581.7	chrI	-1	6660449	6662315			1											1		1			1	1	0	0	0	0	0
WBGene00016226	C29F9.12	C29F9.12	chrIII	-1	121734	122019		1														1			1	1	0	0	0	0	0						1
WBGene00045474	C49G9.2	C49G9.2	chrI	1	12562804	12564200				1												1			1	1	0	0	0	0	0
WBGene00009871	F49C12.1	F49C12.1	chrIV	-1	9294882	9296389			1													1			1	1	0	0	0	0	0
WBGene00001618	glr-7	C43H6.9	chrX	-1	2413902	2417885	CEOPX032		1													1			1	1	0	0	0	0	0
WBGene00020620	T20D4.15	T20D4.15	chrV	-1	3393473	3394002		1														1			1	1	0	0	0	0	0
WBGene00012264	W04G5.3	W04G5.3	chrI	1	11629632	11629923				1												1			1	1	0	0	0	0	0
WBGene00014874	Y38H6A.4	Y38H6A.4	chrV	-1	20348218	20349090				1												1			1	1	0	0	0	0	0
WBGene00044999	Y51H4A.30	Y51H4A.30	chrIV	-1	16610874	16611105				1												1			1	1	0	0	0	0	0
WBGene00001236	elc-1	Y82E9BR.15	chrIII	-1	1415538	1417179	CEOP3061	1			1					1				1	1				1	1	0	0	0	0	0
WBGene00019133	F59H6.2	F59H6.2	chrII	1	2019659	2022446		1								1				1	1				1	1	0	0	0	0	0
WBGene00016486	fbxa-170	C36C9.3	chrX	-1	1676200	1678102		1						1						1	1				1	1	0	0	0	0	0
WBGene00012937	Y47D3A.31	Y47D3A.31	chrIII	-1	11156412	11157129				1										1	1				1	1	0	0	0	0	0				1
WBGene00008348	C56G7.3	C56G7.3	chrIII	1	3389911	3392513		1			1	1				1					1				1	1	0	0	0	0	0
WBGene00018454	fbxb-28	F45D11.8	chrII	1	993300	993586		1													1				1	1	0	0	0	0	0
WBGene00006446	atx-3	F28F8.6	chrV	-1	15575480	15577024	CEOP5444			1									1	1					1	1	0	0	0	0	0	1	1		1		1		1
WBGene00194812	F19B2.12	F19B2.12	chrV	-1	20179887	20180730				1									1	1					1	1	0	0	0	0	0	1	1		1
WBGene00194682	F40D4.17	F40D4.17	chrV	-1	17154550	17155387				1									1	1					1	1	0	0	0	0	0		1		1
WBGene00010294	fbxa-129	F59A1.8	chrV	-1	17655555	17656628	CEOP5460			1				1					1	1					1	1	0	0	0	0	0
WBGene00007500	nasp-1	C09H10.6	chrII	1	11106558	11108365	CEOP2516		1										1	1					1	1	1	0	0	0	0		1	1		1		1
WBGene00003804	npp-18	Y43F4B.4	chrIII	1	13296750	13299017	CEOP3776			1									1	1					1	1	0	0	0	0	0		1	1	1
WBGene00012452	Y17D7B.4	Y17D7B.4	chrV	-1	18776171	18780188				1			1	1	1				1	1					1	1	0	0	0	0	0
WBGene00022028	Y65B4A.4	Y65B4A.4	chrI	1	621711	622190		1											1	1					1	1	0	0	0	0	0						1
WBGene00022075	Y69A2AR.3	Y69A2AR.3	chrIV	1	2641306	2642114	CEOP4064	1											1	1					1	1	1	0	0	0	0		1	1	1
WBGene00011066	ztf-15	R06C7.9	chrI	1	7255507	7258698			1										1	1					1	1	0	0	0	1	0					1	1
WBGene00044360	C33C12.11	C33C12.11	chrII	-1	2163346	2163837		1												1					1	1	0	0	0	0	0		1
WBGene00016785	C49G7.7	C49G7.7	chrV	1	4034461	4038039		1												1					1	1	0	0	1	0	0		1
WBGene00008726	F13A7.11	F13A7.11	chrV	-1	16394011	16395057				1										1					1	1	0	0	0	0	0
WBGene00008727	F13A7.12	F13A7.12	chrV	1	16396339	16398513				1										1					1	1	0	0	0	0	0
WBGene00016525	fbxa-12	C39B5.7	chrIII	1	2219697	2222355		1					1							1					1	1	0	0	0	0	0		1			1
WBGene00010921	fbxb-4	M117.5	chrIV	1	11828950	11830423				1										1					1	1	0	0	0	0	0
WBGene00044253	M117.6	M117.6	chrIV	-1	11827526	11828098				1										1					1	1	0	0	0	0	0
WBGene00018701	pccb-1	F52E4.1	chrX	1	3089486	3092828			1											1					1	1	1	0	0	0	0
WBGene00005656	srr-5	C13D9.2	chrV	1	5007214	5011713		1												1					1	1	0	0	0	0	0						1
WBGene00020795	T25D1.3	T25D1.3	chrX	1	16505175	16507338			1											1					1	1	0	0	0	0	0		1		1
WBGene00017157	tyra-2	F01E11.5	chrX	-1	6996831	7005532			1											1					1	1	0	0	0	0	0
WBGene00021767	Y51F10.6	Y51F10.6	chrI	1	1917047	1923098	CEOP1931	1			1				1	1				1					1	1	0	0	0	0	0
WBGene00021786	Y51H7C.8	Y51H7C.8	chrII	1	1401817	1402112		1												1					1	1	0	0	0	0	0
WBGene00010466	K01D12.7	K01D12.7	chrV	-1	12400695	12401821			1										1						1	1	0	0	0	0	0
WBGene00003755	nlp-17	Y45F10A.5	chrIV	-1	13505243	13505734				1									1						1	1	0	0	1	0	0
WBGene00015975	cas-2	C18E3.6	chrI	1	4190144	4193130	CEOP1152		1		1	1													1	1	0	0	0	1	0
WBGene00008700	clec-254	F11D11.5	chrV	-1	18753472	18754400				1															1	1	0	0	0	0	0
WBGene00018069	F35H10.3	F35H10.3	chrIV	1	8325954	8326957			1																1	1	0	0	0	0	0
WBGene00044691	F47C12.11	F47C12.11	chrIV	-1	3992784	3993406		1																	1	1	0	0	0	0	0
WBGene00185077	F58D2.4	F58D2.4	chrIV	-1	13187980	13189339				1															1	1	0	0	0	0	0
WBGene00017911	fbxb-106	F29A7.1	chrII	1	2762422	2764020		1																	1	1	0	0	0	0	0
WBGene00002025	hsp-60	Y22D7AL.5	chrIII	1	1619733	1625911		1																	1	1	0	0	0	0	0		1	1	1
WBGene00002115	ins-32	Y8A9A.6	chrII	-1	3802961	3803326		1																	1	1	0	0	0	0	0
WBGene00044284	spp-21	T25C12.4	chrX	1	11490065	11490429			1																1	1	0	0	0	0	0
WBGene00005752	srw-5	ZC482.9	chrIII	1	12769463	12771493				1															1	1	0	0	0	0	0
WBGene00012060	T26G10.3	T26G10.3	chrIII	-1	9412770	9413356			1																1	1	0	0	0	0	0
WBGene00014083	ZK795.3	ZK795.3	chrIV	1	12559340	12560665	CEOP4664			1															1	1	1	0	0	0	0			1	1
WBGene00015405	C03H5.3	C03H5.3	chrII	1	386194	387920	CEOP2707	1											1	1	1	1	1	1		1	0	0	0	0	0		1	1	1
WBGene00013610	fbxa-206	Y102A5C.1	chrV	-1	16917172	16918454				1									1	1	1	1	1	1		1	0	0	0	1	0		1				1
WBGene00015840	math-11	C16C4.16	chrII	1	1874281	1875111		1											1	1	1	1	1	1		1	0	0	0	0	0
WBGene00021038	W05F2.6	W05F2.6	chrI	1	3368816	3371449	CEOP1092	1											1	1	1	1	1	1		1	0	0	0	0	0		1
WBGene00014954	Y102A5C.5	Y102A5C.5	chrV	1	16928304	16928975				1									1	1	1	1	1	1		1	0	0	0	0	0
WBGene00022738	ZK418.9	ZK418.9	chrIII	-1	7085133	7087679			1										1	1	1	1	1	1		1	0	0	0	0	0		1		1
WBGene00077670	K02E2.9	K02E2.9	chrV	-1	20362705	20363646				1										1	1	1	1	1		1	0	0	0	0	0
WBGene00021717	sdz-32	Y49F6B.5	chrII	1	3474053	3474732		1												1	1	1	1	1		1	0	0	0	0	0
WBGene00006405	itsn-1	Y116A8C.36	chrIV	1	17119646	17126230				1	1	1									1	1	1	1		1	0	0	0	0	0		1		1	1
WBGene00020991	W03D8.10	W03D8.10	chrI	1	2786137	2787514		1													1	1	1	1		1	0	0	0	0	0
WBGene00018439	fbxa-184	F45C12.8	chrII	1	1710265	1711423		1					1						1	1		1	1	1		1	0	0	0	0	0
WBGene00013623	fbxa-90	Y102A5C.19	chrV	1	16966862	16968561				1									1	1		1	1	1		1	0	0	1	0	0		1		1
WBGene00002077	imb-3	C53D5.6	chrI	-1	310981	314992		1											1	1		1	1	1		1	1	0	0	0	0		1	1	1
WBGene00010794	LLC1.3	LLC1.3	chrIV	1	14464488	14469104				1									1	1		1	1	1		1	0	0	0	0	0		1	1	1
WBGene00003504	mut-7	ZK1098.8	chrIII	-1	9538947	9542286			1										1	1		1	1	1		1	0	0	0	0	0			1	1
WBGene00004138	pqn-53	R07B7.3	chrV	-1	12063415	12065372	CEOP5320		1										1	1		1	1	1		1	0	0	1	0	0		1		1
WBGene00004926	snt-6	C08G5.4	chrII	-1	745469	750171		1											1	1		1	1	1		1	0	0	0	0	0
WBGene00021881	Y54G2A.16	Y54G2A.16	chrIV	-1	2855589	2857113		1											1	1		1	1	1		1	0	0	0	0	0
WBGene00022353	Y82E9BR.21	Y82E9BR.21	chrIII	1	1404784	1406257		1											1	1		1	1	1		1	0	0	0	0	0		1
WBGene00022587	ZC317.1	ZC317.1	chrV	1	5471763	5473128			1										1	1		1	1	1		1	0	0	0	0	0
WBGene00014221	ZK1098.4	ZK1098.4	chrIII	1	9543008	9544324			1										1	1		1	1	1		1	0	0	0	0	0			1	1
WBGene00014244	ZK1307.1	ZK1307.1	chrII	-1	9654284	9655540			1										1	1		1	1	1		1	0	0	0	0	0		1
WBGene00018435	btb-9	F45C12.4	chrII	1	1728575	1730068		1												1		1	1	1		1	0	0	0	0	0
WBGene00015785	C15B12.3	C15B12.3	chrX	-1	6467247	6467525			1											1		1	1	1		1	0	0	0	0	0
WBGene00000803	csb-1	F53H4.1	chrX	-1	15861224	15865843	CEOPX182		1											1		1	1	1		1	0	0	0	0	0				1
WBGene00010009	F53H4.4	F53H4.4	chrX	1	15866342	15868241			1											1		1	1	1		1	0	0	0	0	0				1
WBGene00006740	ulp-5	K02F2.4	chrI	1	6812663	6814248	CEOP1978		1											1		1	1	1		1	0	0	0	1	0
WBGene00013505	Y71A12B.8	Y71A12B.8	chrI	1	13938173	13942004				1										1		1	1	1		1	0	0	0	0	0
WBGene00015501	C06A5.3	C06A5.3	chrI	1	5986494	5990843	CEOP1976		1										1			1	1	1		1	1	0	0	0	0		1	1
WBGene00014752	F38E11.8	F38E11.8	chrIV	-1	9473663	9475348			1										1			1	1	1		1	0	0	0	0	0
WBGene00013421	fbxa-220	Y66A7A.1	chrIII	-1	11482503	11484282				1									1			1	1	1		1	0	0	0	0	0
WBGene00004217	ptr-2	C32E8.8	chrI	-1	3789309	3792800			1										1			1	1	1		1	0	0	0	0	0
WBGene00016236	C29H12.5	C29H12.5	chrII	-1	6110427	6113357			1													1	1	1		1	0	0	0	0	0
WBGene00018715	F52H2.3	F52H2.3	chrX	-1	2540060	2541066			1													1	1	1		1	0	0	0	0	0
WBGene00016346	fbxa-120	C33E10.2	chrX	1	17302678	17303945			1													1	1	1		1	0	0	0	0	0
WBGene00020990	W03D8.9	W03D8.9	chrI	-1	2784619	2786070	CEOP1941	1														1	1	1		1	0	0	0	0	0
WBGene00044757	Y55F3BR.11	Y55F3BR.11	chrIV	1	855708	857263		1											1	1	1		1	1		1	0	0	0	0	0		1		1
WBGene00007171	B0393.6	B0393.6	chrIII	-1	4780124	4781946			1										1	1			1	1		1	0	0	0	1	0
WBGene00015414	C04C3.4	C04C3.4	chrIV	1	3394363	3394642		1											1	1			1	1		1	0	0	0	0	0					1	1
WBGene00044225	C38D4.10	C38D4.10	chrIII	1	4782476	4782700			1										1	1			1	1		1	0	0	0	0	0
WBGene00016888	C52E12.1	C52E12.1	chrII	1	7025758	7030120			1										1	1			1	1		1	1	0	0	0	0		1		1
WBGene00000386	cdc-25.1	K06A5.7	chrI	-1	6469387	6471953			1										1	1			1	1		1	1	0	0	0	0
WBGene00008417	D2030.7	D2030.7	chrI	1	7588649	7591204	CEOP1408		1										1	1			1	1		1	0	0	0	0	0
WBGene00008800	F14E5.2	F14E5.2	chrII	-1	8423900	8429012			1										1	1			1	1		1	1	0	0	0	0		1
WBGene00023284	F41B5.1	F41B5.1	chrV	1	2255389	2256533		1											1	1			1	1		1	0	0	0	0	0
WBGene00020638	fbxa-43	T20H9.2	chrIII	-1	2257543	2258930		1											1	1			1	1		1	0	0	0	0	0						1
WBGene00018908	fncm-1	F56A3.1	chrI	1	5190151	5195249			1										1	1			1	1		1	0	0	0	0	0			1		1		1
WBGene00002148	gon-14	F44C4.4	chrV	-1	6606418	6611146			1										1	1			1	1		1	1	0	0	0	0		1		1
WBGene00019196	H14A12.3	H14A12.3	chrIII	1	7463748	7465173	CEOP3440		1										1	1			1	1		1	0	0	1	0	0		1		1
WBGene00019483	K07D4.2	K07D4.2	chrII	-1	4044774	4047250		1											1	1			1	1		1	0	0	0	0	0
WBGene00019513	K08A2.4	K08A2.4	chrII	1	2988310	2991296		1					1				1		1	1			1	1		1	1	0	0	0	0		1
WBGene00004178	prg-1	D2030.6	chrI	-1	7585320	7588363			1										1	1			1	1		1	1	0	0	0	0
WBGene00004317	rbg-1	F20D1.6	chrX	1	14983455	14987298			1										1	1			1	1		1	0	0	0	0	0				1
WBGene00004823	skr-17	C06A8.4	chrII	1	7783765	7784595			1										1	1			1	1		1	0	0	0	0	0			1
WBGene00006279	str-253	F41B5.8	chrV	-1	2252803	2254602		1											1	1			1	1		1	0	0	0	0	0
WBGene00011562	T07C4.10	T07C4.10	chrIII	1	10320965	10325561			1										1	1			1	1		1	0	0	0	0	0	1	1	1	1	1	1	1	1
WBGene00012014	T25B9.8	T25B9.8	chrIV	-1	10766422	10768291				1									1	1			1	1		1	0	0	0	0	0			1	1
WBGene00044063	tag-231	ZK430.2	chrII	1	4420255	4422314			1										1	1			1	1		1	1	0	0	0	0				1
WBGene00012903	vps-2	Y46G5A.12	chrII	-1	12767146	12768153				1									1	1			1	1		1	1	0	0	0	0		1		1		1		1
WBGene00021001	W03F9.3	W03F9.3	chrV	-1	132466	132998		1											1	1			1	1		1	0	0	0	0	0		1
WBGene00012431	Y11D7A.7	Y11D7A.7	chrIV	1	9249513	9250845			1										1	1			1	1		1	0	0	0	1	0
WBGene00021316	Y32H12A.8	Y32H12A.8	chrIII	-1	5385477	5404946	CEOP3296		1										1	1			1	1		1	0	0	1	0	0			1	1
WBGene00012950	Y47H9C.7	Y47H9C.7	chrI	-1	11891590	11893720				1									1	1			1	1		1	1	0	0	0	0			1	1
WBGene00012951	Y47H9C.8	Y47H9C.8	chrI	1	11893876	11896279				1									1	1			1	1		1	0	0	0	0	0			1	1
WBGene00022165	Y71H2AL.2	Y71H2AL.2	chrIII	1	2686783	2689012		1											1	1			1	1		1	0	0	0	0	0		1		1
WBGene00022370	Y92H12BR.4	Y92H12BR.4	chrI	-1	1433017	1433853		1											1	1			1	1		1	0	0	0	0	0
WBGene00008107	aspm-1	C45G3.1	chrI	-1	9221819	9226379			1											1			1	1		1	0	0	0	0	0			1		1		1
WBGene00015711	C12D5.10	C12D5.10	chrV	-1	7692072	7693469			1											1			1	1		1	0	0	0	0	0		1
WBGene00008259	C52E4.7	C52E4.7	chrV	1	11994283	11995820			1											1			1	1		1	0	0	0	0	0
WBGene00000876	cyl-1	C52E4.6	chrV	-1	11990991	11993748			1											1			1	1		1	1	0	0	0	0
WBGene00018771	duox-2	F53G12.3	chrI	1	137845	144565		1					1	1						1			1	1		1	0	0	0	0	0		1
WBGene00017536	F17A9.4	F17A9.4	chrV	-1	6108944	6110692			1											1			1	1		1	1	0	0	0	0
WBGene00017746	F23F1.5	F23F1.5	chrII	-1	29611	31584		1												1			1	1		1	1	0	0	0	0
WBGene00010281	F58G11.3	F58G11.3	chrV	-1	13669335	13671936			1											1			1	1		1	0	0	0	0	0
WBGene00001590	gip-2	C45G3.3	chrI	1	9226936	9228154	CEOP1986		1											1			1	1		1	0	0	0	0	0			1
WBGene00012588	lips-16	Y38E10A.10	chrII	-1	12610247	12612291				1										1			1	1		1	0	0	0	0	0
WBGene00012589	nspe-4	Y38E10A.11	chrII	1	12613436	12613953				1										1			1	1		1	0	0	0	0	0
WBGene00012904	tiar-2	Y46G5A.13	chrII	1	12768673	12773775				1										1			1	1		1	0	0	0	0	0		1		1
WBGene00013165	Y53F4B.19	Y53F4B.19	chrII	1	15077197	15079399				1										1			1	1		1	0	0	0	0	0		1		1
WBGene00001963	btb-1	F40G9.4	chrIII	1	185651	186921		1											1				1	1		1	0	0	0	0	0		1
WBGene00015468	C05D2.6	C05D2.6	chrIII	-1	5600340	5603722	CEOP3312		1										1				1	1		1	1	0	0	0	0			1
WBGene00015853	C16C8.16	C16C8.16	chrII	1	3445768	3446740	CEOP2104	1											1				1	1		1	0	0	0	0	0
WBGene00015843	C16C8.5	C16C8.5	chrII	-1	3444731	3445367	CEOP2100	1											1				1	1		1	0	0	0	1	0
WBGene00007681	C18D11.3	C18D11.3	chrIII	1	11823348	11824426	CEOP3887			1									1				1	1		1	0	0	0	0	0		1	1	1
WBGene00000465	cpg-1	C07G2.1	chrIII	1	4489326	4491366			1										1				1	1		1	0	0	0	1	0						1
WBGene00008955	F19D8.2	F19D8.2	chrX	1	13834359	13836454			1										1				1	1		1	0	0	0	0	0
WBGene00018509	F46F11.6	F46F11.6	chrI	-1	5616598	5618554	CEOP1264		1										1				1	1		1	0	0	0	0	0		1
WBGene00019244	H25P19.1	H25P19.1	chrV	1	687685	690007		1											1				1	1		1	0	0	0	0	0		1
WBGene00010787	K12D12.5	K12D12.5	chrII	1	11860975	11863453			1										1				1	1		1	0	0	0	0	0	1
WBGene00002214	klc-1	M7.2	chrIV	1	11084084	11086032				1									1				1	1		1	0	0	0	0	0
WBGene00004043	plk-2	Y71F9B.7	chrI	-1	2755581	2758213	CEOP1060	1											1				1	1		1	0	0	0	0	0
WBGene00004383	rnh-2	T13H5.7	chrII	1	8517099	8518361	CEOP2356		1										1				1	1		1	0	0	0	0	0			1	1
WBGene00001514	xnd-1	C05D2.5	chrIII	1	5604417	5607511			1										1				1	1		1	0	0	0	0	0			1
WBGene00021739	Y50D4A.5	Y50D4A.5	chrV	1	1206953	1207777	CEOP5026	1											1				1	1		1	1	0	0	0	0				1
WBGene00021781	Y51H7C.3	Y51H7C.3	chrII	1	1438504	1439705		1											1				1	1		1	0	0	0	0	0		1	1	1	1	1	1	1
WBGene00010631	cash-1	K07C5.8	chrV	1	10362238	10365991			1														1	1		1	0	0	0	0	0			1	1
WBGene00001653	gon-4	K04D7.5	chrIV	1	10197798	10202987			1														1	1		1	0	0	0	0	0			1	1
WBGene00010781	K11H3.4	K11H3.4	chrIII	1	9832866	9834524	CEOP3882		1														1	1		1	0	0	0	0	0
WBGene00003990	pfn-2	F35C8.6	chrX	-1	5353022	5354112			1														1	1		1	0	0	0	0	0
WBGene00004756	sec-24.2	ZC518.2	chrIV	-1	12355600	12360770				1													1	1		1	1	0	0	0	0
WBGene00015168	tag-320	B0403.4	chrX	-1	7066301	7068519			1					1									1	1		1	1	0	0	0	0				1
WBGene00021810	Y53G8AR.2	Y53G8AR.2	chrIII	1	3322961	3331717		1															1	1		1	1	0	0	0	0		1		1
WBGene00016572	C41H7.2	C41H7.2	chrII	1	3014838	3016925		1											1	1	1	1		1		1	0	0	0	0	0		1
WBGene00050946	M162.12	M162.12	chrV	1	19768481	19768698				1									1		1	1		1		1	0	0	0	0	0
WBGene00077694	C43D7.12	C43D7.12	chrV	1	19316484	19316896				1											1	1		1		1	0	0	0	0	0
WBGene00000038	ace-4	Y48B6A.7	chrII	1	14197971	14205250				1			1		1				1	1		1		1		1	0	0	0	0	0		1
WBGene00021879	clec-83	Y54G2A.14	chrIV	-1	2839031	2841432		1					1				1		1	1		1		1		1	0	0	0	0	0
WBGene00000830	ctl-1	Y54G11A.6	chrII	-1	14303536	14306217				1									1	1		1		1		1	0	0	0	0	0
WBGene00012831	Y43F8C.9	Y43F8C.9	chrV	1	19646062	19647310				1									1	1		1		1		1	0	0	0	0	0		1
WBGene00022147	Y71G12B.7	Y71G12B.7	chrI	1	1792457	1792900		1											1	1		1		1		1	0	0	0	0	0
WBGene00013994	ZK524.4	ZK524.4	chrI	-1	7460850	7466420	CEOP1396		1										1	1		1		1		1	1	0	0	0	0		1		1
WBGene00194813	D1025.11	D1025.11	chrX	-1	14526039	14526465			1											1		1		1		1	0	0	0	0	0		1		1
WBGene00001855	hil-4	C18G1.5	chrV	1	4754299	4755459		1												1		1		1		1	0	0	0	0	0		1				1
WBGene00008359	nspc-17	D1025.8	chrX	-1	14524688	14525111			1											1		1		1		1	0	0	0	0	0		1		1
WBGene00005831	srw-84	Y43F8A.4	chrV	1	19381239	19384731				1	1		1		1		1			1		1		1		1	0	1	0	0	0		1
WBGene00015016	bath-14	B0047.5	chrII	-1	2048066	2049180		1											1			1		1		1	0	0	0	0	0
WBGene00020035	egg-5	R12E2.10	chrI	-1	4168989	4171591			1										1			1		1		1	0	0	0	0	0		1	1	1
WBGene00009554	F39B2.3	F39B2.3	chrI	-1	14788113	14789478	CEOP1760			1		1							1			1		1		1	1	0	0	0	0			1	1
WBGene00021087	W08E12.6	W08E12.6	chrIV	1	3298626	3299684		1											1			1		1		1	0	0	0	0	0						1
WBGene00008358	nspc-18	D1025.7	chrX	-1	14527101	14527512			1													1		1		1	0	0	0	0	0
WBGene00019873	R05C11.1	R05C11.1	chrIV	1	2068767	2071679		1														1		1		1	0	0	0	0	0
WBGene00005493	srh-289	C47A10.10	chrV	-1	17792653	17794060				1			1									1		1		1	0	0	0	0	0
WBGene00005802	srw-55	T05G11.6	chrV	-1	15938756	15940334				1												1		1		1	0	0	0	0	0
WBGene00021005	W03F11.1	W03F11.1	chrI	-1	2219473	2222315		1														1		1		1	0	0	0	0	0
WBGene00022214	Y73B3A.12	Y73B3A.12	chrX	1	139221	139640		1														1		1		1	0	0	0	0	0
WBGene00022210	Y73B3A.8	Y73B3A.8	chrX	-1	140434	140683		1														1		1		1	0	0	0	0	0
WBGene00015910	C17F4.2	C17F4.2	chrII	1	3248695	3249390		1											1	1	1			1		1	0	0	0	0	0
WBGene00077646	Y51A2A.14	Y51A2A.14	chrV	-1	18296400	18297338				1	1			1						1	1			1		1	0	0	0	0	0
WBGene00013062	Y51A2A.6	Y51A2A.6	chrV	1	18302686	18303478				1				1						1	1			1		1	0	0	0	0	0
WBGene00015073	B0238.9	B0238.9	chrV	-1	5275533	5278290			1								1		1	1				1		1	0	0	0	0	0
WBGene00016062	C24G6.8	C24G6.8	chrV	-1	5534115	5536229			1										1	1				1		1	1	0	0	0	0		1
WBGene00007988	C37A5.1	C37A5.1	chrI	-1	14158498	14161706				1			1				1		1	1				1		1	0	0	0	0	0		1
WBGene00009044	F22B5.6	F22B5.6	chrII	-1	8453205	8456113			1										1	1				1		1	0	0	0	0	0				1
WBGene00006273	str-246	W09D6.3	chrIII	1	11077605	11079511				1									1	1				1		1	0	0	0	0	0
WBGene00006376	syp-2	C24G6.1	chrV	1	5536685	5537702			1										1	1				1		1	0	0	0	1	0		1
WBGene00020757	ucr-2.3	T24C4.1	chrIII	1	879847	881496		1									1		1	1				1		1	0	0	0	0	1	1	1		1	1	1		1
WBGene00021606	Y46H3C.6	Y46H3C.6	chrV	-1	1697891	1699717		1					1	1	1		1		1	1				1		1	0	0	0	0	0
WBGene00021736	Y50D4A.2	Y50D4A.2	chrV	1	1196061	1197143		1											1	1				1		1	1	0	0	0	0		1		1
WBGene00021853	Y54F10AM.11	Y54F10AM.11	chrIII	-1	2562973	2563980		1					1						1	1				1		1	0	0	0	0	0		1				1
WBGene00022272	Y73E7A.5	Y73E7A.5	chrI	-1	1600626	1601498		1											1	1				1		1	0	0	0	0	0
WBGene00016230	C29G2.2	C29G2.2	chrV	1	2590391	2590819		1												1				1		1	0	0	0	0	0
WBGene00007824	C30H6.7	C30H6.7	chrIV	1	17380596	17382193	CEOP4608			1										1				1		1	0	0	0	0	0				1
WBGene00007826	C30H6.9	C30H6.9	chrIV	-1	17379025	17380133				1										1				1		1	0	0	0	0	0				1
WBGene00016454	C35E7.2	C35E7.2	chrI	1	10841103	10844636	CEOP1784		1											1				1		1	0	0	0	0	0
WBGene00008626	F09E8.8	F09E8.8	chrIV	1	13149557	13150401				1										1				1		1	0	0	0	0	0
WBGene00018975	F56E10.1	F56E10.1	chrV	1	104830	105964		1												1				1		1	0	0	0	0	0		1	1	1
WBGene00019747	ipla-1	M03A1.6	chrII	-1	4590950	4601337	CEOP2726		1											1				1		1	1	0	0	0	0
WBGene00003079	lsm-5	F28F8.3	chrV	1	15569938	15570768				1										1				1		1	1	0	0	0	0			1	1
WBGene00009834	lsy-27	F47H4.1	chrV	-1	17348640	17350151				1			1		1		1			1				1		1	1	0	0	0	0
WBGene00019808	R01B10.6	R01B10.6	chrV	-1	6051359	6053221	CEOP5100		1											1				1		1	1	0	0	0	0
WBGene00005543	sri-31	B0454.2	chrII	1	3051006	3052325		1					1				1			1				1		1	0	1	0	0	0					1	1
WBGene00005544	sri-32	T10D4.12	chrII	-1	3153053	3154486		1					1	1			1			1				1		1	0	1	0	0	0		1
WBGene00020598	T20B6.2	T20B6.2	chrIII	1	2893425	2897175		1			1		1	1	1					1				1		1	0	0	0	0	0		1
WBGene00013644	Y105C5A.25	Y105C5A.25	chrIV	-1	15860189	15861410				1										1				1		1	0	0	0	0	0					1
WBGene00012827	Y43F8C.5	Y43F8C.5	chrV	-1	19631339	19632628				1			1	1			1			1				1		1	0	0	0	0	0		1
WBGene00022544	ZC190.10	ZC190.10	chrV	-1	8695516	8696485			1		1		1		1		1			1				1		1	0	0	0	0	0		1				1
WBGene00007223	C01F6.9	C01F6.9	chrIV	-1	9095739	9096218	CEOP4324		1										1					1		1	1	0	0	0	0			1	1
WBGene00007332	C05C10.5	C05C10.5	chrII	1	9939095	9940278	CEOP2468		1										1					1		1	0	0	0	1	0		1
WBGene00007334	C05C10.7	C05C10.7	chrII	-1	9938047	9938904			1										1					1		1	0	0	0	0	1	1	1			1	1
WBGene00015581	C07H6.4	C07H6.4	chrIII	1	7499643	7503180			1										1					1		1	0	0	0	0	0		1	1	1
WBGene00007580	C14B1.9	C14B1.9	chrIII	-1	3725056	3726484	CEOP3140	1											1					1		1	0	0	0	0	0
WBGene00007221	cpna-3	C01F6.1	chrIV	1	9096825	9099472			1										1					1		1	0	0	0	0	0			1	1		1		1
WBGene00013220	ctl-3	Y54G11A.13	chrII	-1	14307778	14310703				1									1					1		1	0	0	0	0	0
WBGene00013758	fbxa-114	Y113G7B.7	chrV	1	20201619	20202788	CEOP5504			1									1					1		1	0	0	0	0	0		1				1
WBGene00001482	fog-2	Y113G7B.5	chrV	1	20199224	20200610	CEOP5504			1									1					1		1	0	0	0	0	0		1
WBGene00044067	hke-4.1	T28F3.3	chrIV	-1	17285696	17287415				1									1					1		1	0	0	0	0	0		1				1
WBGene00002100	ins-17	F56F3.6	chrIII	-1	4476857	4477552			1										1					1		1	0	0	0	0	0		1
WBGene00019529	K08D10.5	K08D10.5	chrIV	1	4168031	4169884		1					1	1			1		1					1		1	0	0	0	0	0		1
WBGene00014812	M162.10	M162.10	chrV	1	19768653	19770897				1				1			1		1					1		1	0	0	0	0	0
WBGene00011908	pash-1	T22A3.5	chrI	1	10598697	10606729			1										1					1		1	0	0	0	0	0			1	1
WBGene00020095	R144.5	R144.5	chrIII	1	4999345	5001514			1										1					1		1	0	0	0	0	0		1		1
WBGene00019600	rga-3	K09H11.3	chrV	1	5717867	5722071			1										1					1		1	0	0	0	0	0
WBGene00008166	saps-1	C47G2.5	chrII	1	11297636	11301200	CEOP2528		1										1					1		1	1	0	0	0	0
WBGene00011857	T20D3.3	T20D3.3	chrIV	-1	9333325	9335892			1										1					1		1	1	0	0	0	0		1
WBGene00012141	T28F4.6	T28F4.6	chrI	-1	7492784	7494696			1										1					1		1	0	0	0	0	0			1	1
WBGene00021003	W03F9.9	W03F9.9	chrV	1	138892	140225		1						1			1		1					1		1	0	0	0	0	0		1
WBGene00021214	Y18H1A.10	Y18H1A.10	chrI	-1	683727	686578		1											1					1		1	0	0	0	0	0				1
WBGene00021342	Y35H6.3	Y35H6.3	chrX	-1	32451	34439		1											1					1		1	0	0	0	0	0		1
WBGene00021809	Y53G8AR.1	Y53G8AR.1	chrIII	1	3333027	3333948		1											1					1		1	0	0	0	0	0		1		1
WBGene00021888	Y54G2A.23	Y54G2A.23	chrIV	-1	2927513	2928421	CEOP4072	1											1					1		1	1	0	0	0	0		1
WBGene00022006	Y59H11AM.2	Y59H11AM.2	chrIV	1	8567170	8568163			1										1					1		1	0	0	0	0	0
WBGene00015611	C08F1.8	C08F1.8	chrII	-1	1804163	1808323		1			1		1		1		1							1		1	0	0	0	0	0
WBGene00000376	ccr-4	ZC518.3	chrIV	1	12361546	12371824				1	1	1			1									1		1	0	0	0	0	0
WBGene00001372	exo-3	R09B3.1	chrI	-1	11907546	11909271	CEOP1656			1	1	1												1		1	0	0	0	0	0		1		1	1	1		1
WBGene00008498	F01D5.8	F01D5.8	chrII	1	14011128	14013750				1			1		1		1							1		1	0	0	0	0	0		1				1
WBGene00194892	F26H11.6	F26H11.6	chrII	1	14411019	14412143				1														1		1	0	0	0	0	0		1		1
WBGene00009750	F46A8.7	F46A8.7	chrI	-1	11237685	11238219				1														1		1	0	0	0	0	0
WBGene00020282	mps-3	T06A4.2	chrI	-1	760849	761845		1			1		1	1	1									1		1	0	0	0	0	0		1
WBGene00006463	nduf-2.2	T26A5.3	chrIII	1	6465115	6467156	CEOP3390		1															1		1	0	0	0	1	0			1	1
WBGene00003588	nex-1	ZC155.1	chrIII	1	5225582	5226770			1															1		1	1	0	0	0	0
WBGene00021789	nol-6	Y51H7C.11	chrII	-1	1425739	1437506		1																1		1	0	0	0	0	0		1	1	1
WBGene00007718	otub-1	C25D7.8	chrV	1	15066279	15068066	CEOP5440		1															1		1	0	0	0	0	0
WBGene00004173	pqn-94	ZC15.8	chrV	-1	20278622	20279832				1	1		1		1									1		1	0	0	0	0	0		1
WBGene00019817	R02C2.6	R02C2.6	chrV	-1	238964	240363		1																1		1	0	0	0	0	0
WBGene00004315	rbd-1	T23F6.4	chrIV	1	12724897	12730075				1														1		1	0	0	0	0	0		1	1	1
WBGene00023351	T27C4.5	T27C4.5	chrV	1	3731795	3732824		1																1		1	0	0	0	0	0
WBGene00015449	ugt-63	C04F5.7	chrV	-1	5108000	5110774	CEOP5549		1															1		1	0	0	0	0	0
WBGene00006750	unc-10	T10A3.1	chrX	-1	7272279	7280275			1					1										1		1	0	0	1	0	0
WBGene00012334	W07G1.7	W07G1.7	chrII	-1	13964817	13966259				1	1	1	1		1		1							1		1	0	0	0	0	0		1		1
WBGene00012354	W09C5.8	W09C5.8	chrI	-1	13658159	13659118				1														1		1	0	0	0	0	0		1		1
WBGene00013658	Y105C5B.19	Y105C5B.19	chrIV	-1	15981543	15983938				1	1	1		1	1		1							1		1	0	0	0	0	0		1
WBGene00014964	Y105E8B.10	Y105E8B.10	chrI	-1	14678985	14679699				1														1		1	0	0	0	0	0
WBGene00021414	Y38C9B.3	Y38C9B.3	chrV	-1	63726	64503		1				1			1		1							1		1	0	0	0	0	0
WBGene00013164	Y53F4B.18	Y53F4B.18	chrII	-1	15064615	15071590				1														1		1	0	0	0	0	0
WBGene00012395	Y6D1A.1	Y6D1A.1	chrII	-1	11821320	11823555			1															1		1	0	0	0	0	0
WBGene00022843	ZK1055.2	ZK1055.2	chrV	1	6592492	6593617			1															1		1	0	0	0	0	0						1
WBGene00003760	nlp-22	T24D8.3	chrX	-1	2341351	2342081			1												1	1	1			1	0	0	0	0	0
WBGene00019139	bath-1	F59H6.9	chrII	-1	2027629	2028817	CEOP2060	1											1	1		1	1			1	0	0	0	0	0		1
WBGene00019768	M04F3.2	M04F3.2	chrI	1	4765755	4767885			1										1	1		1	1			1	0	0	0	0	0		1		1
WBGene00014154	ZK930.4	ZK930.4	chrII	1	11907719	11908535			1										1	1		1	1			1	0	0	0	0	0
WBGene00001148	eat-20	H30A04.1	chrX	1	15516587	15523957			1													1	1			1	0	0	0	0	0
WBGene00020511	immt-1	T14G11.3	chrX	-1	2682818	2687176			1										1	1			1			1	0	0	0	0	0
WBGene00018788	shc-1	F54A5.3	chrI	-1	969106	973140		1					1						1	1			1			1	0	0	0	0	0
WBGene00018729	F53A9.6	F53A9.6	chrX	-1	8713411	8713900			1											1			1			1	0	0	0	0	0
WBGene00020185	pgk-1	T03F1.3	chrI	1	3867542	3869136	CEOP1124		1											1			1			1	1	0	0	0	0		1		1
WBGene00005422	srh-212	T22F3.6	chrV	-1	3595178	3597139		1												1			1			1	0	1	0	0	0
WBGene00012196	bath-35	W02A11.8	chrI	1	12758514	12759567				1									1				1			1	0	0	0	0	0		1
WBGene00007376	C06C3.5	C06C3.5	chrII	-1	9379990	9381276			1										1				1			1	0	0	0	0	0
WBGene00000370	ccg-1	Y73F8A.6	chrIV	-1	15270126	15275775				1									1				1			1	0	0	1	0	0
WBGene00022450	ubc-26	Y110A2AM.3	chrII	-1	2896741	2900352	CEOP2072	1									1		1				1			1	0	0	0	0	0		1
WBGene00009866	F49C5.3	F49C5.3	chrII	1	12536439	12538535				1													1			1	0	0	0	0	0						1
WBGene00003046	lir-3	F37H8.1	chrII	-1	11183016	11184750			1														1			1	0	0	0	0	0
WBGene00003963	pdi-2	C07A12.4	chrX	1	4524159	4526508			1					1									1			1	1	0	0	0	0
WBGene00011234	R11A5.6	R11A5.6	chrI	-1	7867572	7867913			1														1			1	0	0	0	0	0		1
WBGene00004952	spd-1	Y34D9A.4	chrI	-1	1030632	1033441		1				1	1	1			1						1			1	1	0	0	0	0		1	1	1
WBGene00005487	srh-282	T21D12.5	chrIV	-1	272315	273386		1															1			1	0	1	0	0	0
WBGene00021345	Y37B11A.3	Y37B11A.3	chrIII	-1	5782691	5785089			1		1	1					1						1			1	0	0	1	0	0			1	1		1		1
WBGene00021821	Y54B9A.1	Y54B9A.1	chrV	-1	9439136	9439525			1														1			1	0	0	0	0	0		1
WBGene00013422	Y66A7A.2	Y66A7A.2	chrIII	-1	11485374	11487247	CEOP3854			1													1			1	1	0	0	0	0
WBGene00077751	F14D2.17	F14D2.17	chrII	1	3331892	3334224		1												1	1	1				1	0	0	0	0	0
WBGene00001481	fog-1	Y54E10A.4	chrI	1	3211048	3217367		1			1				1	1				1	1	1				1	0	0	0	0	0						1
WBGene00005400	srh-185	C50H11.7	chrV	1	3066226	3067495		1												1	1	1				1	0	0	0	0	0
WBGene00000037	ace-3	Y48B6A.8	chrII	1	14205558	14210105				1							1				1	1				1	0	0	0	0	0
WBGene00005630	srj-51	C31B8.10	chrV	-1	2918828	2920006		1													1	1				1	0	0	0	0	0
WBGene00002997	lin-8	B0454.1	chrII	1	3056644	3060251		1								1			1	1		1				1	1	0	0	0	0		1
WBGene00011367	T02C12.2	T02C12.2	chrIII	1	4020041	4021854	CEOP3148		1										1	1		1				1	0	0	0	0	0			1	1
WBGene00000063	act-1	T04C12.6	chrV	1	11079149	11082479			1											1		1				1	1	0	0	0	0			1	1
WBGene00000064	act-2	T04C12.5	chrV	-1	11076719	11078150			1											1		1				1	1	0	0	0	0			1	1
WBGene00077664	C43D7.11	C43D7.11	chrV	1	19311834	19312788				1			1		1		1			1		1				1	0	0	0	0	0
WBGene00010492	meg-1	K02B9.1	chrX	-1	13926965	13929563			1											1		1				1	0	0	0	0	0
WBGene00003218	mep-1	M04B2.1	chrIV	1	11524620	11527934	CEOP4448			1										1		1				1	1	0	0	0	0			1
WBGene00021083	W08E12.2	W08E12.2	chrIV	1	3305895	3306635		1												1		1				1	0	0	0	0	0						1
WBGene00189954	F40G9.18	F40G9.18	chrIII	-1	167330	169555		1									1					1				1	0	0	0	0	0
WBGene00044267	F41D3.12	F41D3.12	chrI	1	12279391	12280423				1												1				1	0	0	0	0	0
WBGene00001722	grl-13	F32D1.4	chrV	-1	4362708	4364636		1														1				1	0	0	0	0	0
WBGene00019267	H39E20.1	H39E20.1	chrX	-1	1396270	1397017		1														1				1	0	0	0	0	0
WBGene00002004	hsf-1	Y53C10A.12	chrI	-1	11953502	11961977				1												1				1	1	0	0	0	0
WBGene00001551	gcy-31	T07D1.1	chrX	-1	2420455	2427497			1										1	1	1					1	0	0	0	0	0
WBGene00020485	T13C5.4	T13C5.4	chrX	-1	6191555	6192913			1							1				1	1					1	0	0	0	0	0
WBGene00015607	fbxb-13	C08F1.3	chrII	1	1789187	1790223		1													1					1	0	0	0	0	0
WBGene00003761	nlp-23	T24D8.4	chrX	-1	2342388	2342959			1												1					1	0	0	0	0	0
WBGene00013263	Y57A10A.23	Y57A10A.23	chrII	1	12240323	12242025	CEOP2720			1	1	1									1					1	0	0	1	0	0
WBGene00016070	C24H10.4	C24H10.4	chrX	-1	5058336	5058702			1										1	1						1	0	0	0	0	0			1		1		1
WBGene00007797	C29A12.1	C29A12.1	chrV	-1	10812324	10813384			1										1	1						1	0	0	0	1	0	1	1	1	1	1	1	1	1
WBGene00009509	F37D6.3	F37D6.3	chrI	1	10486705	10487313			1										1	1						1	0	0	0	0	0		1			1	1
WBGene00045483	F56H1.7	F56H1.7	chrI	-1	5760899	5762438	CEOP1975		1										1	1						1	0	0	0	0	0		1		1
WBGene00010263	F58G1.1	F58G1.1	chrII	1	12919508	12923308				1					1	1			1	1						1	0	0	0	1	0		1
WBGene00008996	glb-14	F21A3.6	chrV	-1	15543142	15544852				1									1	1						1	0	0	0	0	0			1
WBGene00002985	lig-1	C29A12.3	chrV	1	10814093	10816697			1										1	1						1	1	0	0	0	0		1	1	1	1	1	1	1
WBGene00011011	R04D3.3	R04D3.3	chrX	-1	13288844	13290559	CEOPX120		1										1	1						1	0	0	0	1	0
WBGene00004766	sel-9	W02D7.7	chrV	-1	8301459	8302566	CEOP5184		1										1	1						1	1	0	0	0	0			1
WBGene00020480	ssup-72	T13C2.4	chrII	1	6777031	6777828			1										1	1						1	0	0	0	0	0		1	1
WBGene00006784	unc-49	T21C12.1	chrIII	1	10520578	10532604			1										1	1						1	0	0	0	0	0
WBGene00021952	vha-19	Y55H10A.1	chrIV	1	3369192	3374694		1											1	1						1	1	0	0	0	0		1	1	1
WBGene00012666	Y39B6A.3	Y39B6A.3	chrV	-1	19189212	19189989				1									1	1						1	0	0	0	0	0		1		1
WBGene00022292	Y75D11A.3	Y75D11A.3	chrX	-1	1745240	1746212		1						1					1	1						1	0	0	0	0	0
WBGene00007290	C04B4.2	C04B4.2	chrX	1	12283233	12285246			1				1	1	1					1						1	0	0	0	0	0		1
WBGene00001130	dyn-1	C02C6.1	chrX	1	15568848	15573627			1											1						1	0	0	1	0	0
WBGene00008932	F18A11.5	F18A11.5	chrII	-1	13009196	13012862	CEOP2670			1										1						1	0	0	0	0	0
WBGene00009367	F33H2.3	F33H2.3	chrI	1	15034506	15035456	CEOP1965			1										1						1	1	0	0	0	0			1	1
WBGene00018168	F38A5.11	F38A5.11	chrIV	1	6590349	6594518			1											1						1	0	0	0	0	0
WBGene00044195	F49A5.10	F49A5.10	chrV	1	16875854	16876121				1										1						1	0	0	0	0	0
WBGene00018925	F56A11.5	F56A11.5	chrIV	-1	568373	570843		1												1						1	0	0	0	0	0
WBGene00019062	F58F12.2	F58F12.2	chrII	-1	6387421	6388210			1											1						1	0	0	0	0	0
WBGene00001393	fat-1	Y67H2A.8	chrIV	1	13315618	13318759				1	1					1				1						1	1	0	0	0	0
WBGene00020452	fbxa-22	T12B5.5	chrIII	1	938858	939426		1												1						1	0	0	0	0	0
WBGene00020454	fbxa-56	T12B5.7	chrIII	-1	937291	938050		1												1						1	0	0	0	0	0
WBGene00021098	fbxb-14	W08F4.9	chrII	-1	582110	582748		1												1						1	0	0	0	0	0
WBGene00016305	fbxc-57	C32B5.12	chrII	-1	951994	952850		1												1						1	0	0	0	0	0
WBGene00010478	K01G5.5	K01G5.5	chrIII	1	10748328	10749985	CEOP3842		1											1						1	1	0	0	0	0			1	1
WBGene00020392	knl-3	T10B5.6	chrV	1	1868899	1870549	CEOP5560	1												1						1	0	0	0	0	0		1	1	1	1		1
WBGene00004302	ran-1	K01G5.4	chrIII	-1	10746242	10747631			1											1						1	1	0	0	0	0			1	1
WBGene00004349	rgs-6	C41G11.3	chrX	-1	5720407	5728621			1											1						1	0	0	0	0	0
WBGene00004361	rib-2	K01G5.6	chrIII	1	10742711	10746576			1											1						1	0	0	0	0	0			1	1
WBGene00004781	set-1	T26A5.7	chrIII	-1	6450740	6452322	CEOP3384		1											1						1	1	0	0	0	0			1
WBGene00006536	tbb-1	K01G5.7	chrIII	-1	10740766	10742362	CEOP3700		1											1						1	1	0	0	0	0			1	1
WBGene00006856	usp-14	C13B4.2	chrII	-1	14485549	14488615				1										1						1	1	0	0	0	0			1	1
WBGene00194904	W02H5.12	W02H5.12	chrV	-1	2626164	2629997		1						1	1	1	1			1						1	0	0	0	0	0
WBGene00021030	W04H10.1	W04H10.1	chrII	1	609078	609339		1												1						1	0	0	0	0	0
WBGene00012617	Y38H6C.4	Y38H6C.4	chrV	-1	20504844	20505066				1										1						1	0	0	0	0	0
WBGene00012620	Y38H6C.7	Y38H6C.7	chrV	1	20513705	20513861				1										1						1	0	0	0	0	0						1
WBGene00021747	Y50D4C.2	Y50D4C.2	chrV	1	936399	939368		1												1						1	0	0	0	0	0
WBGene00012401	Y6E2A.8	Y6E2A.8	chrV	-1	15724830	15726683				1			1	1	1		1			1						1	0	0	0	0	0		1
WBGene00013536	Y73F8A.32	Y73F8A.32	chrIV	-1	15514525	15514773				1										1						1	0	0	0	0	0
WBGene00013537	Y73F8A.33	Y73F8A.33	chrIV	1	15515463	15521151				1										1						1	0	0	0	0	0
WBGene00009489	F36G9.13	F36G9.13	chrV	1	15983341	15986620				1			1	1			1		1							1	0	0	0	0	0		1
WBGene00018660	F52C6.3	F52C6.3	chrII	1	1924762	1925721	CEOP2056	1											1							1	0	0	0	0	0		1
WBGene00001607	gln-6	C28D4.3	chrIV	-1	9739183	9740882			1										1							1	0	0	0	0	0
WBGene00019946	R08C7.2	R08C7.2	chrIV	1	4447322	4449889	CEOP4620		1						1		1		1							1	1	0	0	0	0		1
WBGene00020353	T08B6.4	T08B6.4	chrIV	1	4905673	4908481			1										1							1	0	0	0	0	0
WBGene00012883	Y45F10D.2	Y45F10D.2	chrIV	-1	13773524	13774654				1									1							1	0	0	0	0	0
WBGene00044437	Y47G6A.32	Y47G6A.32	chrI	1	3620585	3625090			1										1							1	0	0	0	0	0
WBGene00013192	Y54E2A.7	Y54E2A.7	chrII	-1	14771887	14772913				1							1		1							1	0	0	0	0	0
WBGene00020366	acdh-10	T08G2.3	chrX	-1	17213067	17214855	CEOPX144		1																	1	1	0	0	0	0
WBGene00022037	acs-13	Y65B4BL.5	chrI	-1	511018	516459		1				1				1	1									1	1	0	0	0	0			1
WBGene00018577	asna-2	F47G3.2	chrX	1	2382684	2384757			1																	1	0	0	0	0	0
WBGene00007168	B0393.3	B0393.3	chrIII	1	4757213	4759696	CEOP3866		1																	1	0	0	0	0	0			1	1	1		1
WBGene00007209	BE10.1	BE10.1	chrIII	-1	12787578	12789376				1				1			1									1	0	0	0	0	0
WBGene00000272	bro-1	F56A3.5	chrI	1	5186946	5188619			1																	1	0	0	0	0	0
WBGene00015610	C08F1.6	C08F1.6	chrII	-1	1787221	1788193		1																		1	0	0	0	0	0
WBGene00015851	C16C8.13	C16C8.13	chrII	1	3451424	3452504	CEOP2104	1																		1	0	0	0	0	0
WBGene00016169	C27F2.7	C27F2.7	chrIII	-1	4980485	4984439			1																	1	0	0	0	0	0						1
WBGene00007848	C31E10.7	C31E10.7	chrX	1	14001833	14003000			1																	1	1	0	0	0	0
WBGene00016318	C32D5.11	C32D5.11	chrII	-1	6352498	6355879	CEOP2240		1																	1	1	0	0	0	0
WBGene00023248	C33E10.9	C33E10.9	chrX	-1	17296570	17297157			1																	1	0	0	0	0	0
WBGene00000411	cdl-1	R06F6.1	chrII	1	10785391	10787221			1																	1	0	0	0	0	0			1	1
WBGene00013013	clec-145	Y48E1B.16	chrII	-1	13588966	13590462				1			1	1												1	0	0	0	0	0
WBGene00008702	clec-252	F11D11.7	chrV	-1	18747915	18748798				1				1												1	0	0	0	0	0
WBGene00017221	dgn-3	F07G6.1	chrX	1	1729853	1731814		1					1		1		1									1	0	0	0	0	0
WBGene00010609	dut-1	K07A1.2	chrI	1	9585309	9587198			1																	1	0	0	0	0	0			1
WBGene00008710	F11E6.7	F11E6.7	chrIV	-1	17457793	17461242				1																1	0	0	0	0	0			1	1	1		1
WBGene00044530	F32D1.11	F32D1.11	chrV	-1	4365431	4366448		1						1			1									1	0	0	0	0	0
WBGene00077663	F55C9.14	F55C9.14	chrV	1	19299533	19300432				1	1				1											1	0	0	0	0	0
WBGene00010142	F56A8.8	F56A8.8	chrIII	1	13285698	13286678				1																1	0	0	0	0	0
WBGene00018988	F56F11.1	F56F11.1	chrIII	1	2891754	2892776		1			1		1			1	1									1	0	0	0	0	0		1
WBGene00010241	F58D2.2	F58D2.2	chrIV	1	13189743	13192259				1							1									1	0	0	0	0	0
WBGene00010617	K07A1.13	K07A1.13	chrI	-1	9583867	9584777			1																	1	0	0	0	0	0			1
WBGene00022357	kbp-4	Y92C3B.1	chrIII	1	1080860	1081290	CEOP3056	1																		1	0	0	0	0	0			1	1	1		1
WBGene00019208	lips-14	H17B01.3	chrII	-1	1484101	1485958		1																		1	0	0	0	0	0
WBGene00045237	mrt-1	F39H2.5	chrI	1	8660814	8663370			1																	1	0	0	0	0	1					1	1
WBGene00009507	mus-101	F37D6.1	chrI	-1	10479292	10484960	CEOP1926		1																	1	1	0	0	0	0		1	1		1	1	1
WBGene00020915	nol-5	W01B11.3	chrI	1	3267094	3269150		1																		1	1	0	0	0	0		1	1	1
WBGene00012603	nspe-6	Y38E10A.25	chrII	-1	12615831	12616100				1																1	0	0	0	0	0
WBGene00003955	pcn-1	W03D2.4	chrIV	-1	4047922	4049443		1																		1	1	0	0	0	0		1	1	1
WBGene00007331	pho-11	C05C10.4	chrII	1	9931786	9934384			1																	1	0	0	0	0	0
WBGene00004208	ptc-1	ZK675.1	chrII	1	7893178	7900465	CEOP2320		1																	1	0	0	0	0	0
WBGene00014822	R11H6.6	R11H6.6	chrV	-1	14591459	14593627			1																	1	0	0	0	0	0
WBGene00004277	rab-18	Y92C3B.3	chrIII	-1	1079455	1080471	CEOP3052	1																		1	0	0	1	0	0			1	1
WBGene00004487	rps-18	Y57G11C.16	chrIV	1	14825645	14826428				1																1	1	0	0	0	0		1		1
WBGene00021282	set-21	Y24D9A.2	chrIV	1	4390846	4393449			1																	1	0	0	0	0	0		1	1	1	1		1
WBGene00009513	sfxn-1.2	F37H8.4	chrII	1	11185969	11188021			1																	1	0	0	0	0	0
WBGene00020961	sknr-1	W02H5.7	chrV	-1	2622054	2625458		1																		1	0	0	0	0	0
WBGene00005193	srg-36	K04C1.6	chrX	-1	14229599	14230807			1				1													1	0	1	0	0	0
WBGene00005545	sri-33	Y27F2A.4	chrII	-1	3155170	3156852		1					1		1		1									1	0	0	0	0	0
WBGene00005582	sri-70	Y61B8B.1	chrV	1	17303029	17304413				1				1												1	0	1	1	0	0					1	1
WBGene00006365	syg-1	K02E10.8	chrX	-1	2509310	2515309			1																	1	0	0	1	0	0
WBGene00020408	T10D4.6	T10D4.6	chrII	1	3119334	3123187		1																		1	1	0	0	0	0				1
WBGene00020642	T20H9.6	T20H9.6	chrIII	1	2246006	2249541		1																		1	0	0	0	0	0
WBGene00011934	T22H2.4	T22H2.4	chrI	-1	11694713	11694988				1																1	0	0	0	0	0		1
WBGene00010697	uda-1	K08H10.4	chrV	1	10004668	10007459			1																	1	1	0	0	0	0		1
WBGene00012208	W02D9.2	W02D9.2	chrI	1	12532659	12534345				1																1	0	0	0	0	0		1	1	1
WBGene00012299	W06D11.1	W06D11.1	chrX	1	12293699	12295479			1				1	1	1	1										1	0	0	0	0	0
WBGene00012362	W09D10.4	W09D10.4	chrIII	-1	10711431	10716092			1																	1	0	0	0	0	0
WBGene00012453	Y17D7B.5	Y17D7B.5	chrV	1	18775198	18776167				1			1	1	1											1	0	0	0	0	0
WBGene00012475	Y18D10A.2	Y18D10A.2	chrI	-1	12807521	12809286				1						1										1	0	0	0	0	0
WBGene00012560	Y37D8A.25	Y37D8A.25	chrIII	-1	12818357	12820151				1	1	1			1	1	1									1	0	0	0	0	0		1		1
WBGene00021376	Y37E11B.3	Y37E11B.3	chrIV	-1	3580964	3582904	CEOP4100	1			1															1	0	0	0	0	0		1
WBGene00012910	Y46G5A.20	Y46G5A.20	chrII	1	12810969	12811863				1																1	0	0	1	0	0					1	1
WBGene00021650	Y47G6A.26	Y47G6A.26	chrI	-1	3618893	3619700			1																	1	0	0	0	0	0
WBGene00013138	Y53C10A.10	Y53C10A.10	chrI	1	12020749	12028304				1																1	0	0	0	0	0
WBGene00013311	Y57G11C.15	Y57G11C.15	chrIV	-1	14822500	14825146				1																1	1	0	0	0	0		1		1
WBGene00022319	Y82E9BL.2	Y82E9BL.2	chrIII	-1	1351208	1353363		1				1	1		1		1									1	0	0	0	0	0
WBGene00021552	zip-4	Y44E3B.1	chrI	-1	3264258	3266764		1																		1	0	0	0	0	0		1	1	1		1		1
WBGene00014259	ZK1320.11	ZK1320.11	chrII	1	9667565	9668613	CEOP2444		1																	1	1	0	0	0	0
WBGene00022685	ZK250.2	ZK250.2	chrII	1	1948698	1949899		1								1										1	0	0	0	0	0					1
WBGene00014119	ZK858.6	ZK858.6	chrI	-1	9138260	9145625	CEOP1536		1																	1	1	0	0	0	0
WBGene00044249	F55B11.6	F55B11.6	chrIV	-1	14416338	14417174				1									1	1	1	1	1	1	1		0	0	0	0	0
WBGene00004053	pme-5	ZK1005.1	chrV	-1	1276416	1285700		1											1	1	1	1	1	1	1		0	0	1	0	0
WBGene00004351	rgs-8.1	F52D2.2	chrX	-1	1952473	1953554		1											1	1	1	1	1	1	1		0	0	0	0	0
WBGene00016025	xbx-4	C23H5.3	chrIV	1	2114626	2115625		1											1	1	1	1	1	1	1		0	0	0	0	0		1
WBGene00044995	Y105C5A.28	Y105C5A.28	chrIV	1	15715321	15716202				1									1	1	1	1	1	1	1		0	0	0	0	0
WBGene00012567	Y37H2A.7	Y37H2A.7	chrV	-1	18131525	18134450				1									1	1	1	1	1	1	1		0	0	0	0	0		1
WBGene00002110	ins-27	ZC334.11	chrI	1	14026637	14027557				1									1		1	1	1	1	1		0	0	0	0	0
WBGene00195229	Y71A12B.25	Y71A12B.25	chrI	-1	13923049	13923751				1									1		1	1	1	1	1		0	0	0	0	0
WBGene00023036	F39E9.10	F39E9.10	chrII	-1	3302765	3303754		1														1	1	1	1		0	0	0	0	0		1
WBGene00021681	Y48G1C.8	Y48G1C.8	chrI	-1	101213	108161	CEOP1957	1														1	1	1	1		0	0	0	0	0	1	1	1	1
WBGene00003611	nhr-12	R04B5.4	chrV	-1	10082116	10084018			1										1	1	1		1	1	1		0	0	0	0	0
WBGene00004354	rgs-11	F45B8.1	chrX	1	14964513	14965863			1										1	1	1		1	1	1		0	0	0	0	0
WBGene00044493	Y54G2A.50	Y54G2A.50	chrIV	1	2918731	2919684		1											1	1	1		1	1	1		0	0	0	0	0		1
WBGene00022388	Y95B8A.8	Y95B8A.8	chrI	1	853454	854134		1											1	1	1		1	1	1		0	0	0	0	0		1	1	1
WBGene00009654	F43D9.3	F43D9.3	chrIII	1	10507017	10517959			1										1	1			1	1	1		0	0	0	0	0			1	1
WBGene00013552	gmn-1	Y75B8A.17	chrIII	-1	12224532	12225232	CEOP3756			1									1	1			1	1	1		0	0	0	0	0				1
WBGene00044430	T23F4.5	T23F4.5	chrII	-1	1173716	1174612		1											1	1			1	1	1		0	0	0	0	0
WBGene00044158	Y53C12A.8	Y53C12A.8	chrII	-1	9698628	9700373			1										1	1			1	1	1		0	0	0	0	0
WBGene00009696	F44F1.4	F44F1.4	chrI	-1	13263792	13265559				1									1				1	1	1		0	0	0	0	0
WBGene00015848	C16C8.10	C16C8.10	chrII	-1	3464154	3464683		1															1	1	1		0	0	0	0	0		1
WBGene00006242	str-209	F26G5.5	chrV	1	4948921	4951010		1															1	1	1		0	0	0	0	0
WBGene00022018	Y61A9LA.7	Y61A9LA.7	chrV	-1	4558310	4559787		1															1	1	1		0	0	0	0	0
WBGene00013553	Y75B8A.18	Y75B8A.18	chrIII	-1	12225537	12226141	CEOP3756			1													1	1	1		0	0	0	0	0			1	1
WBGene00009380	F34H10.3	F34H10.3	chrX	-1	9633219	9635590			1													1		1	1		1	0	0	0	0
WBGene00021480	Y39H10A.4	Y39H10A.4	chrV	-1	3733130	3739385		1							1					1	1			1	1		0	0	0	0	0		1
WBGene00012830	Y43F8C.8	Y43F8C.8	chrV	1	19644209	19645728				1				1							1			1	1		0	0	0	0	0		1
WBGene00003170	mec-6	W02D3.3	chrI	1	6724918	6728331			1										1	1				1	1		0	0	0	0	0		1	1	1
WBGene00007676	srz-57	C18D4.7	chrV	1	17542693	17544082				1									1	1	1	1	1		1		0	0	0	0	0
WBGene00018330	elks-1	F42A6.9	chrIV	-1	3342513	3350015		1			1									1	1	1	1		1		0	0	0	0	0		1
WBGene00010264	F58G1.2	F58G1.2	chrII	-1	12915365	12918949				1						1				1	1	1	1		1		1	0	0	0	0		1
WBGene00009689	F44E5.2	F44E5.2	chrII	1	11766709	11774063			1										1		1	1	1		1		0	0	0	0	0
WBGene00015564	C07D8.5	C07D8.5	chrX	1	7344001	7344505			1												1	1	1		1		0	0	0	0	0
WBGene00019309	K02E7.4	K02E7.4	chrII	1	1072413	1074734		1				1				1		1			1	1	1		1		0	0	0	0	0
WBGene00005795	srw-48	F26D2.9	chrV	1	16420976	16422754				1											1	1	1		1		0	1	0	0	0
WBGene00021253	Y22D7AL.15	Y22D7AL.15	chrIII	-1	1658239	1659854		1													1	1	1		1		0	0	1	0	0						1
WBGene00013433	Y66D12A.7	Y66D12A.7	chrIII	-1	11579133	11580710	CEOP3886			1											1	1	1		1		0	0	0	0	0		1		1
WBGene00013603	Y87G2A.17	Y87G2A.17	chrI	-1	13491376	13493308	CEOP1996			1	1										1	1	1		1		0	0	0	0	0		1
WBGene00014178	ZK1010.4	ZK1010.4	chrIII	1	12980992	12984322				1						1			1	1		1	1		1		0	0	0	0	0		1	1
WBGene00015429	sor-3	C04E7.2	chrX	1	353620	357934		1												1		1	1		1		1	0	0	0	0
WBGene00044705	T22F3.12	T22F3.12	chrV	-1	3589016	3592186		1								1				1		1	1		1		0	0	0	0	0
WBGene00011911	T22B3.3	T22B3.3	chrIV	-1	11703159	11703762				1									1			1	1		1		0	0	0	0	0
WBGene00019977	fpn-1.2	R09B5.4	chrV	-1	1462013	1464777		1														1	1		1		0	0	0	0	0
WBGene00012784	Y43C5A.4	Y43C5A.4	chrIV	1	10278001	10279448			1		1									1	1		1		1		0	0	0	0	0
WBGene00022143	Y71G12B.3	Y71G12B.3	chrI	1	1812957	1813586		1												1	1		1		1		0	0	0	0	0
WBGene00009233	F28H6.4	F28H6.4	chrX	1	14127812	14133458			1										1		1		1		1		1	0	0	0	0
WBGene00014967	Y113G7A.2	Y113G7A.2	chrV	1	20041662	20044374				1									1		1		1		1		0	0	0	0	0
WBGene00002219	klp-7	K11D9.1	chrIII	1	10805831	10810902			1		1	1						1			1		1		1		1	0	0	0	0		1
WBGene00005905	srx-14	C44B12.8	chrIV	-1	1111462	1114820		1													1		1		1		0	0	0	0	0
WBGene00013160	Y53F4B.13	Y53F4B.13	chrII	1	15026104	15036956	CEOP2656			1	1	1						1			1		1		1		0	0	0	0	0		1	1	1
WBGene00043997	Y79H2A.12	Y79H2A.12	chrIII	-1	12025459	12028711				1											1		1		1		0	0	0	0	0
WBGene00007927	C34C12.8	C34C12.8	chrIII	1	3460392	3461583	CEOP3120	1											1	1			1		1		0	0	0	0	0		1	1	1
WBGene00017345	F10E7.3	F10E7.3	chrII	1	7124615	7125276			1										1	1			1		1		0	0	0	0	0
WBGene00010845	M03C11.8	M03C11.8	chrIII	-1	10428230	10435886	CEOP3672		1										1	1			1		1		0	0	0	0	0		1	1	1
WBGene00014232	ttll-4	ZK1128.6	chrIII	1	10124091	10132633	CEOP3657		1										1	1			1		1		1	0	0	0	0	1	1		1
WBGene00044040	F54D5.16	F54D5.16	chrII	1	11558276	11558587			1											1			1		1		0	0	0	0	0		1
WBGene00019240	H24K24.3	H24K24.3	chrV	1	911775	916461	CEOP5024	1												1			1		1		1	0	0	0	0		1		1
WBGene00022651	ZK84.4	ZK84.4	chrII	-1	6008432	6008736			1											1			1		1		0	0	0	0	0
WBGene00044053	C01G12.12	C01G12.12	chrII	-1	14562383	14564056				1									1				1		1		0	0	0	0	0
WBGene00009511	F37H8.2	F37H8.2	chrII	-1	11171684	11175420			1										1				1		1		0	0	0	0	0
WBGene00194956	F37H8.7	F37H8.7	chrII	1	11175919	11176146			1										1				1		1		0	0	0	0	0
WBGene00018234	F40E12.1	F40E12.1	chrII	1	3617815	3618196		1											1				1		1		0	0	0	0	0						1
WBGene00015006	B0041.1	B0041.1	chrI	1	4664500	4665349			1														1		1		0	0	0	0	0
WBGene00194945	C32H11.16	C32H11.16	chrIV	-1	12927659	12928101				1													1		1		0	0	0	0	0
WBGene00019683	K12H6.2	K12H6.2	chrII	-1	2812687	2815549		1			1					1							1		1		0	0	0	0	0		1
WBGene00004235	ptr-21	Y65B4BR.3	chrI	1	550711	556685		1			1			1				1					1		1		0	0	0	0	0					1
WBGene00005652	srr-1	W07G4.6	chrV	-1	13049752	13053895			1														1		1		0	0	0	0	0
WBGene00005770	srw-23	F49A5.8	chrV	1	16873920	16875432				1	1	1		1				1					1		1		0	0	0	0	0						1
WBGene00005898	srx-7	C14C6.1	chrV	1	560196	562957		1															1		1		0	0	0	0	0
WBGene00020944	W02D7.9	W02D7.9	chrV	-1	8326171	8326494			1														1		1		0	0	0	0	0
WBGene00013268	Y57A10A.28	Y57A10A.28	chrII	-1	12276286	12279315	CEOP2597			1													1		1		0	0	0	0	0				1
WBGene00022556	ZC204.6	ZC204.6	chrII	-1	1644255	1644820		1															1		1		0	0	0	0	0
WBGene00007066	3R5.2	3R5.2	chrIII	1	13782486	13783358				1										1	1	1			1		0	0	0	0	0
WBGene00044177	C30G7.3	C30G7.3	chrV	-1	14942116	14945651			1						1	1				1	1	1			1		0	0	0	0	0		1
WBGene00019388	K04F1.9	K04F1.9	chrV	1	1665252	1665949		1												1	1	1			1		0	0	0	0	0
WBGene00008495	F01D5.5	F01D5.5	chrII	-1	14001611	14002226				1											1	1			1		0	0	0	0	0
WBGene00018636	F49E8.2	F49E8.2	chrIV	1	7548427	7551500			1							1		1			1	1			1		0	0	0	0	0		1
WBGene00018984	F56F10.1	F56F10.1	chrX	1	872515	875949		1													1	1			1		0	0	1	0	0
WBGene00005308	srh-87	H27D07.6	chrV	-1	2944377	2945680		1													1	1			1		0	1	0	0	0
WBGene00005875	srw-128	H27D07.1	chrV	1	2946811	2948414		1													1	1			1		0	0	0	0	0
WBGene00023509	srz-39	Y7A9C.4	chrIV	-1	16306280	16306807				1											1	1			1		0	0	0	0	0
WBGene00011854	T20B3.14	T20B3.14	chrV	-1	16820607	16821298				1											1	1			1		0	0	0	0	0
WBGene00013635	Y105C5A.10	Y105C5A.10	chrIV	1	15635730	15635915				1											1	1			1		0	0	0	0	0
WBGene00195068	Y48G8AL.16	Y48G8AL.16	chrI	-1	1214967	1217277		1							1	1		1			1	1			1		0	0	0	0	0
WBGene00001171	egl-2	F16B3.1	chrV	-1	1289373	1299332		1												1		1			1		0	0	0	0	0
WBGene00050881	ZK39.10	ZK39.10	chrI	1	11160026	11162566				1										1		1			1		0	0	0	0	0
WBGene00007078	AC8.6	AC8.6	chrX	-1	217008	217496		1														1			1		0	0	0	0	0
WBGene00009295	fbxa-180	F31E9.1	chrV	-1	17319571	17322419				1		1										1			1		0	0	0	0	0					1
WBGene00021598	Y46E12BR.1	Y46E12BR.1	chrII	1	15196138	15197999				1												1			1		0	0	0	0	0
WBGene00006546	tbx-9	T07C4.6	chrIII	-1	10339890	10341766			1											1	1				1		0	0	0	0	0
WBGene00012926	Y47D3A.13	Y47D3A.13	chrIII	-1	11223347	11224004				1									1		1				1		0	0	0	0	0
WBGene00014698	C37A5.3	C37A5.3	chrI	-1	14154757	14155237				1											1				1		0	0	0	0	0
WBGene00015909	clec-124	C17F4.1	chrII	1	3250317	3250860		1													1				1		0	0	0	0	0
WBGene00009154	F26D2.16	F26D2.16	chrV	-1	16418329	16420405				1											1				1		0	0	0	0	0
WBGene00019419	K05F6.8	K05F6.8	chrII	-1	1567331	1567753		1													1				1		0	0	0	0	0
WBGene00019588	K09F6.5	K09F6.5	chrII	-1	2272067	2273389		1						1							1				1		0	0	0	0	0
WBGene00020621	T20D4.16	T20D4.16	chrV	-1	3394386	3394685		1													1				1		0	0	0	0	0
WBGene00012456	Y17D7C.2	Y17D7C.2	chrV	-1	18716047	18719916				1											1				1		0	0	0	0	0		1				1
WBGene00012586	Y38E10A.8	Y38E10A.8	chrII	1	12607135	12608613				1											1				1		0	0	0	0	0
WBGene00045344	Y43F8C.23	Y43F8C.23	chrV	-1	19710841	19711712				1											1				1		0	0	0	0	0
WBGene00022291	Y75D11A.2	Y75D11A.2	chrX	1	1742843	1743518		1													1				1		0	0	0	0	0
WBGene00022713	ZK355.3	ZK355.3	chrII	-1	2927020	2927637		1													1				1		0	0	0	0	0					1	1
WBGene00086560	ZK355.8	ZK355.8	chrII	1	2927817	2928153		1													1				1		0	0	0	0	0		1
WBGene00007632	C16C10.13	C16C10.13	chrIII	1	4176652	4177552			1										1	1					1		0	0	0	0	0	1	1
WBGene00007624	C16C10.3	C16C10.3	chrIII	-1	4172308	4176135			1										1	1					1		0	0	0	0	1	1	1			1	1
WBGene00000473	cey-2	F46F11.2	chrI	1	5619570	5620671	CEOP1268		1				1	1	1	1		1	1	1					1		0	0	0	1	0		1				1
WBGene00000779	cpn-3	F28H1.2	chrI	1	3987894	3988705			1										1	1					1		0	0	1	0	0			1
WBGene00017759	F23H11.3	F23H11.3	chrIII	-1	900005	901433	CEOP3048	1											1	1					1		1	0	0	0	0		1	1	1
WBGene00002008	hsp-4	F43E2.8	chrII	-1	7350076	7352593			1										1	1					1		1	0	0	0	0		1	1	1
WBGene00021191	Y14H12B.1	Y14H12B.1	chrII	1	3934455	3936073		1											1	1					1		0	0	0	0	0		1	1	1
WBGene00021192	Y14H12B.2	Y14H12B.2	chrII	-1	3932180	3933742		1											1	1					1		0	0	0	0	0	1	1	1	1	1	1	1	1
WBGene00021715	Y49F6B.2	Y49F6B.2	chrII	1	3502969	3504912	CEOP2108	1					1	1	1	1			1	1					1		0	0	0	0	0			1	1
WBGene00022737	ZK418.8	ZK418.8	chrIII	-1	7083620	7084999			1										1	1					1		0	0	0	0	0	1		1			1
WBGene00007211	BE10.3	BE10.3	chrIII	1	12807990	12811549				1					1	1				1					1		0	0	0	0	0		1
WBGene00019316	K02E7.12	K02E7.12	chrII	1	1070647	1071497		1												1					1		0	0	0	0	0	1	1
WBGene00012515	Y26G10.1	Y26G10.1	chrV	-1	17692476	17695801				1	1					1				1					1		0	0	0	0	0		1
WBGene00077635	Y46G5A.42	Y46G5A.42	chrII	-1	12749023	12749311				1										1					1		0	0	0	0	0
WBGene00022023	Y64H9A.1	Y64H9A.1	chrX	1	5057332	5057550			1											1					1		0	0	0	0	0
WBGene00014069	ZK678.3	ZK678.3	chrX	-1	15748415	15749138			1											1					1		0	0	0	0	0	1	1			1	1
WBGene00013749	Y113G7A.12	Y113G7A.12	chrV	1	20144216	20147066				1									1						1		0	0	0	0	0
WBGene00022601	ZC404.1	ZC404.1	chrV	1	6793919	6795113			1										1						1		0	0	0	0	0			1		1		1
WBGene00000066	act-4	M03F4.2	chrX	1	4960522	4964388			1					1	1										1		1	0	0	0	0
WBGene00015846	C16C8.8	C16C8.8	chrII	-1	3461115	3461684		1																	1		0	0	0	0	0
WBGene00007674	C18D4.4	C18D4.4	chrV	-1	17530131	17531484				1				1											1		0	0	0	0	0					1	1
WBGene00008190	clec-114	C49A1.9	chrI	-1	14231658	14235936				1	1			1	1	1		1							1		0	0	0	0	0		1
WBGene00008703	clec-251	F11D11.8	chrV	-1	18746182	18746959				1		1	1	1				1							1		0	0	0	0	0
WBGene00000684	col-110	F19C7.7	chrIV	-1	4608202	4609671			1																1		0	0	0	0	0
WBGene00000815	csn-3	Y38C1AA.2	chrIV	1	194745	202585	CEOP4636	1								1									1		1	0	0	0	0						1
WBGene00017352	F10E7.11	F10E7.11	chrII	-1	7120547	7121740			1																1		0	0	0	0	0
WBGene00008949	F19B6.3	F19B6.3	chrIV	1	12327338	12328696				1															1		0	0	0	0	0
WBGene00017707	F22E5.8	F22E5.8	chrII	1	2640063	2641902		1																	1		0	0	0	0	0					1	1
WBGene00009363	F33E2.7	F33E2.7	chrI	1	12585372	12585961				1															1		0	0	0	0	0
WBGene00018427	F44E7.5	F44E7.5	chrV	-1	5778801	5780905	CEOP5565		1																1		0	0	0	0	0
WBGene00009756	F46B3.1	F46B3.1	chrV	-1	20596179	20599791				1															1		0	0	0	0	0
WBGene00021716	fbxb-112	Y49F6B.3	chrII	1	3491182	3492917		1																	1		0	0	0	0	0
WBGene00020543	fbxb-83	T17A3.6	chrIII	-1	143630	144791		1																	1		0	0	0	0	0
WBGene00001856	hil-5	B0414.3	chrI	1	5774588	5775613			1																1		0	0	0	0	0		1
WBGene00007770	nhr-259	C27C7.8	chrI	1	11436772	11437397				1															1		0	0	0	0	0
WBGene00003663	nhr-73	C27C7.4	chrI	-1	11433661	11435920				1															1		0	0	0	0	0
WBGene00003762	nlp-24	F35B12.7	chrV	1	11616265	11616869			1																1		0	0	0	0	0
WBGene00018935	skr-18	F56B3.12	chrIV	-1	794752	795689	CEOP4036	1			1	1													1		0	0	0	0	0	1	1		1		1		1
WBGene00005417	srh-207	ZK262.1	chrV	-1	18409015	18410214				1				1											1		0	0	0	0	0
WBGene00005556	sri-44	K07E8.12	chrII	-1	671549	673851		1																	1		0	0	0	0	0
WBGene00006318	sup-9	F34D6.3	chrII	-1	2684687	2686982		1			1	1		1		1		1							1		0	0	0	0	0		1
WBGene00020548	T17A3.12	T17A3.12	chrIII	-1	145046	145298		1																	1		0	0	0	0	0
WBGene00020707	T22H9.3	T22H9.3	chrV	1	343461	347624		1								1									1		0	0	0	0	0
WBGene00012212	W02D9.6	W02D9.6	chrI	-1	12560250	12560699				1															1		0	0	0	0	0
WBGene00020989	W03D8.8	W03D8.8	chrI	1	2791691	2794897		1																	1		0	0	0	0	0
WBGene00021029	W04D12.1	W04D12.1	chrIII	1	5836882	5837139			1																1		0	0	0	0	0
WBGene00021120	W09G12.6	W09G12.6	chrIV	1	1231897	1232812		1																	1		0	0	0	0	0
WBGene00195012	Y38C1BA.4	Y38C1BA.4	chrIV	1	1821816	1822407		1																	1		0	0	0	0	0
WBGene00021457	Y39F10C.1	Y39F10C.1	chrII	1	674439	677030		1																	1		0	0	0	0	0
WBGene00012852	Y44A6D.1	Y44A6D.1	chrV	-1	20787385	20787592				1															1		0	0	0	0	0
WBGene00012921	Y46G5A.36	Y46G5A.36	chrII	1	12823610	12823978				1															1		0	0	0	0	0				1
WBGene00021651	Y47G6A.27	Y47G6A.27	chrI	1	3555584	3557403			1						1	1									1		0	0	0	0	0
WBGene00014914	Y52B11A.11	Y52B11A.11	chrI	-1	11065933	11068920				1	1														1		0	0	0	0	0
WBGene00022025	Y65B4A.1	Y65B4A.1	chrI	1	654099	658709	CEOP1977	1			1					1									1		1	0	0	0	0		1		1
WBGene00022141	Y71G12B.1	Y71G12B.1	chrI	1	1823447	1825969		1			1	1	1					1							1		0	0	0	0	0		1	1	1	1		1
WBGene00022335	Y82E9BR.2	Y82E9BR.2	chrIII	1	1439088	1443374		1					1	1	1	1		1							1		0	0	0	0	0					1	1
WBGene00045050	ZC15.10	ZC15.10	chrV	1	20310705	20311612				1			1												1		0	0	0	0	0
WBGene00022581	ZC262.4	ZC262.4	chrIII	-1	8333490	8334161			1																1		0	0	0	0	0
WBGene00050963	ZK218.15	ZK218.15	chrV	-1	17094156	17094461				1															1		0	0	0	0	0
WBGene00018443	btb-7	F45C12.12	chrII	1	1713264	1714407		1												1	1	1	1	1			0	0	0	0	0
WBGene00003002	lin-13	C03B8.4	chrIII	-1	7700069	7709407			1		1										1	1	1	1			1	0	0	0	0		1	1	1		1		1
WBGene00138716	F17B5.10	F17B5.10	chrI	-1	13189781	13190572				1									1	1		1	1	1			0	0	0	0	0		1
WBGene00015251	B0546.4	B0546.4	chrIV	-1	3382945	3384144	CEOP4084	1												1		1	1	1			1	0	0	0	0		1		1
WBGene00013555	fbxa-89	Y75B8A.21	chrIII	1	12236083	12238854				1									1			1	1	1			0	0	0	0	0
WBGene00007966	C36A4.5	C36A4.5	chrIII	1	3844257	3848244			1			1					1					1	1	1			1	0	0	0	0		1		1
WBGene00018817	F54D12.4	F54D12.4	chrII	-1	1368097	1368306		1											1		1		1	1			0	0	0	0	0		1
WBGene00013395	Y62H9A.7	Y62H9A.7	chrX	-1	11884262	11886370			1										1		1		1	1			0	0	0	0	0		1
WBGene00017056	D2062.4	D2062.4	chrII	1	2623928	2624535		1													1		1	1			0	0	0	0	0
WBGene00007124	B0250.7	B0250.7	chrV	-1	20473061	20475925				1									1	1			1	1			0	0	0	0	0
WBGene00015928	C17H12.2	C17H12.2	chrIV	-1	6786847	6789610	CEOP4675		1										1	1			1	1			0	0	0	0	0		1	1	1
WBGene00007788	C28A5.1	C28A5.1	chrIII	-1	4429590	4434371			1										1	1			1	1			0	0	0	1	0
WBGene00009374	F34D10.4	F34D10.4	chrIII	1	3736582	3739749		1											1	1			1	1			0	0	0	0	0		1		1
WBGene00018564	F47D12.9	F47D12.9	chrIII	-1	6299279	6303167			1										1	1			1	1			1	0	0	0	0		1	1
WBGene00002221	klp-10	C33H5.4	chrIV	1	7797109	7800433			1										1	1			1	1			0	0	0	0	0		1		1
WBGene00016381	sgo-1	C33H5.15	chrIV	-1	7794845	7796292	CEOP4256		1										1	1			1	1			0	0	0	0	0	1	1	1	1	1	1	1	1
WBGene00013018	Y48G10A.1	Y48G10A.1	chrI	1	13489549	13491224				1									1	1			1	1			1	0	0	0	0	1	1		1
WBGene00013550	Y75B8A.14	Y75B8A.14	chrIII	-1	12216677	12218535	CEOP3888			1									1	1			1	1			1	0	0	0	0		1		1
WBGene00015095	B0261.7	B0261.7	chrI	-1	5269547	5270937			1										1				1	1			0	0	0	0	0
WBGene00009247	bath-45	F29C12.5	chrII	1	13122968	13124719				1									1				1	1			0	0	0	0	0
WBGene00010974	bbs-5	R01H10.6	chrIII	-1	10258781	10261567	CEOP3664		1			1						1	1				1	1			0	0	1	0	0		1
WBGene00015976	C18E3.9	C18E3.9	chrI	-1	4214295	4215754			1										1				1	1			0	0	0	0	0			1	1
WBGene00008346	C56A3.8	C56A3.8	chrV	1	13560482	13561978			1										1				1	1			0	0	0	0	0
WBGene00015102	cpg-2	B0280.5	chrIII	-1	7102024	7103930			1										1				1	1			0	0	0	1	0					1	1
WBGene00008838	F15A4.2	F15A4.2	chrII	1	12462465	12464018				1								1	1				1	1			0	0	0	0	0		1	1	1
WBGene00009372	F34D10.2	F34D10.2	chrIII	-1	3729615	3735024		1											1				1	1			0	0	0	0	0		1	1	1
WBGene00005568	sri-56	T10D4.2	chrII	1	3134102	3135286		1					1				1	1	1				1	1			0	0	0	0	0
WBGene00006489	tag-143	ZK856.9	chrV	-1	10210412	10212103	CEOP5248		1										1				1	1			0	0	0	0	0		1
WBGene00014113	ZK856.12	ZK856.12	chrV	1	10212923	10216685			1										1				1	1			0	0	0	0	0		1
WBGene00015766	C14C11.2	C14C11.2	chrV	1	5660912	5663480			1														1	1			0	0	0	1	0
WBGene00017715	F22F1.3	F22F1.3	chrX	-1	8161790	8163026			1														1	1			0	0	0	0	0
WBGene00017774	F25B5.2	F25B5.2	chrIII	1	5958729	5962278			1		1	1					1	1					1	1			0	0	0	0	0		1	1	1	1		1
WBGene00010184	F57A10.2	F57A10.2	chrV	1	15766556	15767255				1													1	1			0	0	0	0	0			1	1
WBGene00013617	fbxa-204	Y102A5C.10	chrV	1	16940934	16941621				1													1	1			0	0	0	0	0
WBGene00013618	fbxa-205	Y102A5C.12	chrV	-1	16945635	16946322				1													1	1			0	0	0	0	0
WBGene00001813	haf-3	F57A10.3	chrV	-1	15760428	15766157				1													1	1			1	0	0	0	0			1	1
WBGene00004172	pqn-92	Y75B8A.27	chrIII	1	12307678	12311810				1	1	1		1			1	1					1	1			0	0	0	0	0					1	1
WBGene00008145	set-5	C47E8.8	chrV	1	14698955	14707581			1		1	1		1			1	1					1	1			0	0	0	0	0		1				1
WBGene00012469	Y17G7B.18	Y17G7B.18	chrII	-1	12103960	12107793	CEOP2719			1													1	1			0	0	0	0	0			1	1
WBGene00045239	Y49E10.29	Y49E10.29	chrIII	1	12469192	12472440				1		1											1	1			0	0	0	0	0
WBGene00077762	Y57G11C.499	Y57G11C.499	chrIV	-1	14754057	14754937				1													1	1			0	0	0	0	0
WBGene00022853	ZK1127.6	ZK1127.6	chrII	1	7042842	7044601			1														1	1			1	0	0	0	0
WBGene00019497	K07E8.6	K07E8.6	chrII	-1	638155	639495		1											1		1	1		1			0	0	0	0	0
WBGene00010292	F59A1.6	F59A1.6	chrV	1	17685166	17686048				1											1	1		1			0	0	0	0	0
WBGene00012836	Y43F8C.15	Y43F8C.15	chrV	-1	19709745	19710584				1											1	1		1			0	0	0	0	0
WBGene00044074	mltn-5	W02B8.6	chrII	1	13925194	13930442				1									1	1		1		1			0	0	0	0	0
WBGene00004027	pie-1	Y49E10.14	chrIII	1	12426761	12429076				1									1	1		1		1			0	0	0	0	0
WBGene00012808	Y43F8A.1	Y43F8A.1	chrV	1	19370573	19371302				1									1	1		1		1			0	0	0	0	0		1
WBGene00000831	ctl-2	Y54G11A.5	chrII	-1	14299477	14301974				1								1	1			1		1			0	0	1	0	0
WBGene00014701	C43D7.1	C43D7.1	chrV	1	19327299	19329047				1												1		1			0	0	0	0	0
WBGene00008696	clec-255	F11D11.1	chrV	-1	18769739	18770695				1												1		1			0	0	0	0	0
WBGene00008961	F19H6.6	F19H6.6	chrX	1	12362329	12363042			1													1		1			0	0	0	0	0
WBGene00018259	F41B4.3	F41B4.3	chrX	-1	6835445	6836216	CEOPX084		1													1		1			1	0	0	0	0						1
WBGene00010099	fbxb-117	F55C9.1	chrV	1	19282585	19284565				1												1		1			0	0	0	0	0
WBGene00008360	nspc-19	D1025.9	chrX	1	14528647	14529004			1													1		1			0	0	0	0	0
WBGene00020136	T01B6.4	T01B6.4	chrX	-1	2337648	2338298			1													1		1			0	0	0	0	0
WBGene00050933	T19C9.9	T19C9.9	chrV	1	17234304	17234605				1												1		1			0	0	0	0	0
WBGene00000203	arx-5	Y37D8A.1	chrIII	-1	12816689	12818006				1									1	1				1			1	0	0	0	0				1
WBGene00007122	B0250.5	B0250.5	chrV	1	20493893	20497315				1									1	1				1			1	0	0	0	0		1		1
WBGene00015351	C02F5.10	C02F5.10	chrIII	-1	8248614	8249410			1										1	1				1			0	0	0	0	0		1	1	1
WBGene00007967	cyp-25A4	C36A4.6	chrIII	-1	3849889	3852053	CEOP3863		1										1	1				1			0	0	0	0	0		1		1
WBGene00012424	dlc-3	Y10G11A.2	chrIV	1	16432199	16437925				1									1	1				1			0	0	0	0	0		1
WBGene00017328	F10C5.2	F10C5.2	chrIII	1	472300	475353	CEOP3024	1											1	1				1			0	0	0	0	0		1	1	1
WBGene00009182	F26H11.4	F26H11.4	chrII	1	14408675	14410733				1									1	1				1			0	0	0	0	1			1		1	1	1
WBGene00008613	fbxb-69	F09C3.5	chrI	-1	14283452	14285307				1									1	1				1			0	0	0	0	0
WBGene00001511	fzy-1	ZK177.6	chrII	1	5501616	5503889	CEOP2188		1										1	1				1			1	0	0	0	0			1	1	1		1
WBGene00011376	gla-3	T02E1.3	chrI	1	8214404	8217998			1										1	1				1			1	0	0	0	1	1	1			1	1
WBGene00001736	grl-27	F40C5.3	chrV	-1	3575116	3575871		1						1	1		1		1	1				1			0	0	0	0	0
WBGene00001977	hmg-12	Y17G7A.1	chrII	1	11916448	11918256			1										1	1				1			1	0	0	0	0	1			1	1	1		1
WBGene00002231	knl-1	C02F5.1	chrIII	1	8250565	8254251			1										1	1				1			1	0	0	0	0		1	1	1
WBGene00077770	M04D5.3	M04D5.3	chrI	-1	11339770	11341603				1									1	1				1			0	0	0	0	0
WBGene00003870	ooc-5	C18E9.11	chrII	1	8993105	8994473	CEOP2404		1										1	1				1			0	0	0	0	0		1
WBGene00006889	pfd-3	T06G6.9	chrI	1	12728162	12729861				1									1	1				1			1	0	0	0	0				1
WBGene00012756	Y41C4A.9	Y41C4A.9	chrIII	-1	11710727	11718549	CEOP3728			1									1	1				1			1	0	0	0	0	1	1		1
WBGene00014920	Y53F4B.38	Y53F4B.38	chrII	-1	15118353	15118875				1									1	1				1			0	0	0	0	0		1		1
WBGene00021854	Y54F10AR.1	Y54F10AR.1	chrIII	-1	2573175	2575231	CEOP3861	1											1	1				1			0	0	0	0	0
WBGene00000894	dab-1	M110.5	chrII	1	8225923	8229100			1											1				1			1	0	0	0	0
WBGene00045408	F31E9.8	F31E9.8	chrV	1	17324882	17326143				1					1		1			1				1			0	0	0	0	0
WBGene00018631	F49D11.7	F49D11.7	chrI	-1	10923566	10923892			1											1				1			0	0	0	0	0
WBGene00008012	fbxa-133	C38D9.4	chrV	1	17584767	17585850				1	1			1	1					1				1			0	0	0	0	0
WBGene00021312	Y32H12A.4	Y32H12A.4	chrIII	-1	5369144	5372277			1											1				1			0	0	0	0	0
WBGene00012952	Y47H9C.9	Y47H9C.9	chrI	-1	11898780	11901467				1										1				1			0	0	0	0	0
WBGene00007445	C08F8.3	C08F8.3	chrIV	1	11155008	11156674				1									1					1			0	0	0	0	0
WBGene00007675	C18D4.6	C18D4.6	chrV	-1	17535589	17538347				1					1				1					1			0	0	0	0	0		1	1	1
WBGene00000459	ceh-38	F22D3.1	chrII	1	6951598	6955366			1										1					1			0	0	1	0	0
WBGene00000768	cor-1	R01H10.3	chrIII	1	10249039	10254619			1										1					1			0	0	1	0	0			1	1
WBGene00017397	F12A10.8	F12A10.8	chrII	-1	5498834	5501392			1										1					1			0	0	0	0	0			1	1
WBGene00017453	F14D2.5	F14D2.5	chrII	1	3340392	3341217		1											1					1			0	0	0	0	0
WBGene00017508	F16B4.6	F16B4.6	chrV	1	1587206	1589151		1						1	1				1					1			0	0	0	0	0
WBGene00044250	F56G4.7	F56G4.7	chrI	-1	11361081	11362892				1			1						1					1			0	0	0	0	0		1
WBGene00013840	fbxa-151	ZC47.7	chrIII	-1	1265665	1266847		1				1	1	1			1		1					1			0	0	0	0	0
WBGene00009222	fbxa-95	F28F8.4	chrV	1	15571470	15572698	CEOP5520			1									1					1			0	0	0	0	0						1
WBGene00013756	ftr-1	Y113G7B.4	chrV	1	20196938	20198209	CEOP5504			1									1					1			0	0	0	0	0
WBGene00001606	gln-5	F26D10.10	chrIV	-1	17272194	17273615				1									1					1			0	0	0	1	0	1				1	1
WBGene00002180	jtr-1	Y77E11A.4	chrIV	1	1420973	1421769		1											1					1			0	0	0	0	0		1	1	1
WBGene00019315	K02E7.11	K02E7.11	chrII	-1	1074729	1075525		1											1					1			0	0	0	0	0
WBGene00019430	K06A5.2	K06A5.2	chrI	1	6468131	6469427			1										1					1			0	0	0	0	1		1			1
WBGene00010608	K07A1.1	K07A1.1	chrI	-1	9582673	9583513	CEOP1548		1										1					1			0	0	0	0	0
WBGene00002850	let-716	C16A3.3	chrIII	1	6383499	6389360	CEOP3368		1										1					1			1	0	0	0	0		1		1
WBGene00012375	mecr-1	W09H1.5	chrII	-1	13185917	13187264				1									1					1			0	0	0	0	0				1
WBGene00021839	nduf-5	Y54E10BL.5	chrI	-1	3001349	3002851	CEOP1943	1											1					1			0	0	0	0	0
WBGene00019863	R04A9.3	R04A9.3	chrX	-1	377391	380569	CEOPX174	1											1					1			0	0	0	0	0
WBGene00006374	syx-4	T01B11.3	chrIV	1	8457265	8458922			1										1					1			0	0	0	0	0	1					1
WBGene00021838	Y54E10BL.3	Y54E10BL.3	chrI	1	3003529	3005943		1											1					1			0	0	1	0	0
WBGene00021883	Y54G2A.18	Y54G2A.18	chrIV	-1	2891555	2892495		1											1					1			1	0	0	0	0
WBGene00044742	Y55F3BR.10	Y55F3BR.10	chrIV	1	832436	832828		1											1					1			0	0	0	0	0
WBGene00022098	Y69A2AR.27	Y69A2AR.27	chrIV	-1	2597619	2598103		1											1					1			0	0	0	0	0		1
WBGene00022125	Y71F9B.1	Y71F9B.1	chrI	1	2774912	2775424		1											1					1			0	0	0	0	0
WBGene00013894	ZC434.8	ZC434.8	chrI	-1	10348040	10349636			1										1					1			0	0	0	0	1	1	1	1	1	1	1	1	1
WBGene00004775	sep-1	Y47G6A.12	chrI	-1	3433159	3438545		1			1													1			0	0	0	0	0	1	1		1	1	1		1
WBGene00010339	acl-1	F59F4.4	chrX	1	15849831	15851702			1								1							1			0	0	0	0	0		1		1
WBGene00007969	acs-19	C36A4.9	chrIII	1	3864018	3867080			1															1			1	0	0	0	0		1	1	1
WBGene00016158	ari-1	C27A12.8	chrI	-1	6058451	6061035	CEOP1296		1															1			0	0	0	0	0		1
WBGene00007092	B0001.7	B0001.7	chrIV	-1	12150036	12154220	CEOP4500			1														1			0	0	0	0	0
WBGene00017450	bath-27	F14D2.1	chrII	1	3360224	3361357	CEOP2680	1																1			0	0	0	0	0
WBGene00017461	bath-28	F14D2.13	chrII	-1	3343687	3344970	CEOP2092	1																1			0	0	0	0	0
WBGene00017460	bath-30	F14D2.12	chrII	-1	3345283	3346374	CEOP2092	1																1			0	0	0	0	0
WBGene00018666	bath-6	F52C6.9	chrII	-1	1918324	1919444	CEOP2052	1																1			0	0	0	0	0
WBGene00015729	C13A10.2	C13A10.2	chrII	-1	1357184	1358014		1			1	1	1	1			1	1						1			0	0	0	0	0		1
WBGene00015842	C16C8.4	C16C8.4	chrII	-1	3443282	3444385	CEOP2100	1																1			0	0	0	0	0
WBGene00007769	C27C7.7	C27C7.7	chrI	1	11421924	11423591				1		1	1	1			1	1						1			0	0	0	0	0
WBGene00016311	C32D5.3	C32D5.3	chrII	-1	6318054	6321127			1															1			1	0	0	0	0			1
WBGene00008005	C38D4.4	C38D4.4	chrIII	1	4793049	4795388	CEOP3220		1															1			0	0	0	1	0
WBGene00016676	C45G9.5	C45G9.5	chrIII	1	5048081	5050116			1															1			0	0	1	0	0		1
WBGene00016889	C52E12.4	C52E12.4	chrII	-1	7012753	7022467	CEOP2276		1															1			0	0	0	0	0			1
WBGene00000467	cep-1	F52B5.5	chrI	1	8324113	8328851			1															1			0	0	0	0	0
WBGene00012454	clec-256	Y17D7B.6	chrV	1	18771662	18772611				1				1										1			0	0	0	0	0
WBGene00000772	cpb-3	B0414.5	chrI	-1	5788634	5791755			1															1			0	0	0	0	0
WBGene00022271	cpx-1	Y73E7A.4	chrI	-1	1594658	1596177		1			1	1	1	1			1	1						1			0	0	0	0	0
WBGene00018256	cutl-28	F41A4.1	chrIV	1	684497	688339		1																1			0	0	0	0	0
WBGene00000879	cyn-3	Y75B12B.5	chrV	1	15189908	15190909			1															1			1	0	0	0	0			1
WBGene00000975	dhs-12	K08F4.9	chrIV	1	10145225	10146203			1															1			1	0	0	0	0
WBGene00001034	dnj-16	R74.4	chrIII	1	4191115	4193399	CEOP3865		1															1			1	0	0	0	0
WBGene00001047	dnj-29	Y63D3A.6	chrI	-1	14104417	14113167				1														1			1	0	0	0	0		1		1
WBGene00001048	dnj-30	Y71F9B.16	chrI	-1	2718028	2721479	CEOP1052	1																1			0	0	0	0	0
WBGene00008502	F01G4.3	F01G4.3	chrIV	-1	11135546	11142320				1														1			0	0	0	0	0			1	1
WBGene00008503	F01G4.4	F01G4.4	chrIV	1	11143322	11145997				1							1							1			0	0	0	0	0			1	1	1		1
WBGene00044287	F21H12.7	F21H12.7	chrII	1	6091750	6092764			1															1			0	0	0	0	0
WBGene00017702	F22D3.6	F22D3.6	chrII	-1	6947150	6951258			1		1													1			0	0	0	0	0
WBGene00017745	F23F1.4	F23F1.4	chrII	-1	25407	28418		1																1			0	0	0	0	0
WBGene00017952	F31E3.6	F31E3.6	chrIII	1	6982382	6983007			1															1			0	0	0	0	0		1
WBGene00009411	F35E2.3	F35E2.3	chrI	-1	11733931	11735955				1			1	1			1	1						1			0	0	0	0	0
WBGene00009563	F39H2.3	F39H2.3	chrI	1	8664947	8666491	CEOP1496		1															1			1	0	0	0	0			1
WBGene00009922	F52B5.3	F52B5.3	chrI	-1	8318339	8323976	CEOP1460		1															1			0	0	0	0	0
WBGene00018671	F52C6.14	F52C6.14	chrII	-1	1930996	1934512		1																1			0	0	0	0	0
WBGene00018902	F55G1.6	F55G1.6	chrIV	1	7473478	7474942	CEOP4224		1															1			0	0	0	1	0
WBGene00018948	F56C9.3	F56C9.3	chrIII	1	7311233	7313102			1															1			0	0	0	1	0
WBGene00018950	F56C9.6	F56C9.6	chrIII	-1	7308292	7310709			1															1			0	0	0	1	0
WBGene00010185	F57A10.4	F57A10.4	chrV	1	15769409	15770540				1														1			0	0	0	1	0						1
WBGene00019013	F57C9.7	F57C9.7	chrI	-1	4824910	4826634			1															1			0	0	0	1	0
WBGene00019097	F59B1.2	F59B1.2	chrV	1	3633326	3634672		1																1			0	0	1	0	0
WBGene00001401	fbf-1	H12I13.4	chrII	-1	6078239	6080785			1															1			0	0	0	0	0
WBGene00001402	fbf-2	F21H12.5	chrII	-1	6088639	6091452			1															1			0	0	0	0	0
WBGene00011513	fbxa-197	T06C12.4	chrV	1	15867677	15869161				1														1			0	0	0	0	0
WBGene00011514	fbxa-198	T06C12.5	chrV	1	15869292	15870617				1														1			0	0	0	0	0
WBGene00012879	fbxa-215	Y45F10C.3	chrIV	-1	13665320	13666887				1														1			0	0	0	0	0
WBGene00022495	fbxa-78	Y119D3B.19	chrIII	-1	1257181	1258406		1				1	1	1			1							1			0	0	0	0	0
WBGene00013403	fbxb-100	Y63D3A.2	chrI	-1	14090726	14096334				1		1		1			1	1						1			0	0	0	0	0		1
WBGene00001568	gei-11	F32H2.1	chrI	1	8962315	8966123	CEOP1512		1															1			1	0	0	0	0
WBGene00001745	gsa-1	R06A10.2	chrI	1	1068594	1075013		1			1	1	1	1	1		1	1						1			0	0	0	0	0		1	1
WBGene00013095	ing-3	Y51H1A.4	chrII	1	13875962	13882515	CEOP2620			1														1			1	0	0	0	0		1
WBGene00010549	K03H4.2	K03H4.2	chrV	1	13152880	13154010			1															1			0	0	0	0	0	1	1	1	1
WBGene00010584	K05C4.8	K05C4.8	chrI	1	14732415	14733538				1	1	1		1	1		1	1						1			0	0	0	0	0		1
WBGene00019409	K05F1.8	K05F1.8	chrII	-1	5799298	5799638			1															1			0	0	0	0	0
WBGene00019461	K07A3.3	K07A3.3	chrI	1	2599981	2602651		1			1		1	1			1							1			0	0	0	0	0
WBGene00010654	K08C9.7	K08C9.7	chrI	-1	11495511	11496235				1														1			0	0	0	0	0
WBGene00045012	K08F4.13	K08F4.13	chrIV	-1	10144266	10144409			1															1			0	0	0	0	0
WBGene00044539	K09H11.9	K09H11.9	chrV	-1	5714744	5716596			1															1			0	0	0	0	0
WBGene00010736	K10C8.3	K10C8.3	chrV	1	12697132	12704256	CEOP5364		1															1			1	0	0	0	0				1		1		1
WBGene00002245	lag-1	K08B4.1	chrIV	1	6095400	6110630			1															1			1	0	0	0	0	1
WBGene00014811	M162.9	M162.9	chrV	-1	19773371	19774945				1														1			0	0	0	0	0
WBGene00022432	math-43	Y108F1.4	chrX	-1	269127	270029		1																1			0	0	0	0	0
WBGene00003230	mex-5	W02A2.7	chrIV	1	13353692	13356087				1														1			1	0	0	0	0
WBGene00021648	mis-12	Y47G6A.24	chrI	-1	3604517	3605760	CEOP1100		1															1			1	0	0	0	0			1	1	1	1	1	1
WBGene00014206	nit-1	ZK1058.6	chrIII	1	3922187	3923767			1															1			0	0	0	0	0			1			1
WBGene00008357	nspc-16	D1025.6	chrX	1	14523505	14523927			1															1			0	0	0	0	0
WBGene00003835	nxf-2	C15H11.6	chrV	-1	14416100	14417814			1															1			0	0	0	1	0						1
WBGene00012528	pap-1	Y32F6A.3	chrV	1	10441956	10452910	CEOP5558		1															1			0	0	1	0	0
WBGene00022719	pdhk-2	ZK370.5	chrIII	-1	8737128	8741333			1															1			1	0	0	0	0		1	1	1
WBGene00004044	plk-3	F55G1.8	chrIV	-1	7470848	7473329			1															1			0	0	0	0	0
WBGene00004241	puf-5	F54C9.8	chrII	1	8575490	8577682	CEOP2368		1															1			0	0	0	1	0						1
WBGene00019804	R01B10.2	R01B10.2	chrV	-1	6041179	6043168			1															1			0	0	0	0	0			1
WBGene00011026	R05D7.1	R05D7.1	chrI	-1	12162389	12163526				1		1		1				1						1			0	0	1	0	0		1
WBGene00004333	rec-8	W02A2.6	chrIV	-1	13349096	13353169				1	1													1			0	0	0	0	1					1	1
WBGene00004496	rps-27	F56E10.4	chrV	-1	103385	104070		1																1			1	0	0	0	0		1	1	1
WBGene00011887	set-17	T21B10.5	chrII	-1	8938988	8940426			1															1			1	0	0	0	0			1	1
WBGene00007615	set-31	C15H11.5	chrV	1	14417940	14420066			1															1			0	0	0	0	0
WBGene00004909	snf-10	Y32F6A.2	chrV	-1	10438343	10440772			1															1			0	0	0	0	0
WBGene00005572	sri-60	Y47G7B.3	chrII	-1	2701394	2702862		1					1	1			1	1						1			0	0	0	0	0		1
WBGene00012321	srxa-6	W07A8.5	chrV	1	20734952	20736118				1														1			0	0	0	0	0
WBGene00022534	syn-16	ZC155.7	chrIII	-1	5207521	5209164	CEOP3848		1															1			0	0	0	0	0
WBGene00006377	syp-3	F39H2.4	chrI	-1	8663044	8664151			1															1			0	0	0	0	1			1		1		1
WBGene00011560	T07C4.3	T07C4.3	chrIII	1	10352061	10355446			1															1			1	0	0	0	0
WBGene00011886	T21B10.4	T21B10.4	chrII	1	8940832	8942656			1															1			0	0	0	1	0			1	1
WBGene00006704	ubc-7	F58A4.10	chrIII	-1	9630001	9631085	CEOP3608		1															1			1	0	0	0	0			1	1
WBGene00021019	W04B5.2	W04B5.2	chrIII	1	2424345	2427728		1					1	1	1		1							1			0	0	0	0	0		1
WBGene00013786	Y116A8C.5	Y116A8C.5	chrIV	1	16924359	16927154				1				1	1									1			0	0	0	0	0
WBGene00012493	Y20C6A.3	Y20C6A.3	chrV	1	17382065	17383348				1														1			0	0	0	0	0
WBGene00044256	Y45F10C.6	Y45F10C.6	chrIV	1	13653931	13655827				1	1		1		1		1							1			0	0	0	0	0
WBGene00044436	Y47G6A.31	Y47G6A.31	chrI	1	3603346	3604522			1															1			1	0	0	0	0
WBGene00021663	Y48G1BL.4	Y48G1BL.4	chrI	-1	217148	217431		1																1			0	0	0	0	0
WBGene00013031	Y49E10.7	Y49E10.7	chrIII	-1	12377630	12378728				1														1			0	0	0	0	0
WBGene00013406	Y63D3A.7	Y63D3A.7	chrI	1	14113624	14114079	CEOP1731			1														1			0	0	0	0	0		1		1
WBGene00013523	Y73F8A.14	Y73F8A.14	chrIV	-1	15318540	15319004				1														1			0	0	0	0	0
WBGene00022305	Y76G2A.2	Y76G2A.2	chrI	1	5978985	5979435			1															1			0	0	0	0	0
WBGene00013579	Y79H2A.2	Y79H2A.2	chrIII	-1	12028867	12030654				1	1	1	1	1	1		1							1			0	0	0	0	0		1			1
WBGene00022352	Y82E9BR.20	Y82E9BR.20	chrIII	1	1374144	1376534		1					1	1			1							1			0	0	0	0	0
WBGene00022654	ZK105.3	ZK105.3	chrV	1	7697123	7700741			1															1			0	0	0	0	0
WBGene00014205	ZK1058.5	ZK1058.5	chrIII	-1	3920606	3921686			1															1			0	0	0	0	0			1
WBGene00022760	ZK546.3	ZK546.3	chrII	1	4939421	4940276			1															1			0	0	0	0	0
WBGene00014060	ZK673.4	ZK673.4	chrII	1	10452860	10455139			1															1			0	0	0	0	0		1
WBGene00022830	ZK973.1	ZK973.1	chrI	1	4382566	4385226	CEOP1994		1															1			1	0	0	0	0				1
WBGene00022836	ZK973.11	ZK973.11	chrI	-1	4379321	4381899			1															1			1	0	0	0	0				1
WBGene00019960	ztf-16	R08E3.4	chrX	-1	4805959	4811506			1															1			0	0	0	0	0
WBGene00019272	H42K12.3	H42K12.3	chrX	1	1311596	1316631		1													1	1	1				0	0	0	0	0
WBGene00020476	T13B5.9	T13B5.9	chrII	-1	1101373	1104512		1			1					1					1	1	1				0	0	0	0	0		1
WBGene00000257	bmk-1	F23B12.8	chrV	-1	14453288	14456901			1										1	1		1	1				1	0	0	0	0		1	1	1	1		1
WBGene00000592	coh-3	F08H9.1	chrV	1	14457460	14460126			1										1	1		1	1				0	0	0	0	1		1	1	1	1	1	1	1
WBGene00018819	rog-1	F54D12.6	chrII	-1	1373696	1374992		1											1	1		1	1				0	0	0	0	0
WBGene00009410	F35E2.2	F35E2.2	chrI	-1	11736628	11737690				1										1		1	1				0	0	0	0	0
WBGene00011055	arrd-14	R06B9.4	chrII	1	13752251	13756188				1									1			1	1				0	0	0	0	0
WBGene00002007	hsp-3	C15H9.6	chrX	-1	6088980	6092089			1													1	1				1	0	0	0	0				1
WBGene00044215	ZK228.10	ZK228.10	chrV	1	18456700	18457301				1												1	1				0	0	0	0	0
WBGene00017101	E02H9.3	E02H9.3	chrIII	1	2461899	2465068		1						1		1			1	1	1		1				0	0	0	0	0		1			1	1
WBGene00001161	efl-1	Y102A5C.18	chrV	-1	16958566	16965657				1	1	1		1		1	1	1			1		1				0	0	0	0	0		1	1	1	1		1
WBGene00019818	R02C2.7	R02C2.7	chrV	-1	241327	242617		1													1		1				0	0	0	0	0
WBGene00194737	Y50D7A.13	Y50D7A.13	chrIII	-1	293902	294521		1													1		1				0	0	0	0	0
WBGene00015797	C15F1.8	C15F1.8	chrII	-1	6976768	6977325			1										1	1			1				0	0	0	0	0		1
WBGene00010362	H04D03.1	H04D03.1	chrIII	1	10436512	10437800			1										1	1			1				0	0	0	0	0	1	1	1	1	1	1	1	1
WBGene00011375	T02E1.2	T02E1.2	chrI	-1	8219999	8223003			1										1	1			1				0	0	0	0	0		1		1
WBGene00021056	W06B4.1	W06B4.1	chrII	1	4471401	4473745			1										1	1			1				0	0	0	0	1	1				1	1
WBGene00021126	W10C8.3	W10C8.3	chrI	-1	2832874	2833255		1											1	1			1				0	0	0	0	0
WBGene00007545	C13B4.1	C13B4.1	chrII	-1	14470297	14479551				1	1									1			1				0	0	0	0	0			1	1
WBGene00012969	Y48A6B.8	Y48A6B.8	chrIII	-1	11027151	11029338				1				1				1		1			1				0	0	0	0	0						1
WBGene00016152	pho-12	C27A2.4	chrII	-1	5056220	5060704			1										1				1				0	0	0	0	0		1		1
WBGene00011753	T13F3.6	T13F3.6	chrV	-1	16270196	16271201				1									1				1				0	0	0	0	0
WBGene00015801	C15H9.5	C15H9.5	chrX	1	6093251	6097536			1														1				0	0	0	0	0				1
WBGene00015951	C18A11.6	C18A11.6	chrX	-1	8033323	8034768			1					1		1		1					1				0	0	0	0	0
WBGene00007928	C34C12.9	C34C12.9	chrIII	-1	3474243	3475437		1			1							1					1				0	0	0	0	0		1
WBGene00008237	C50F4.14	C50F4.14	chrV	-1	9547584	9549812			1							1		1					1				1	0	0	0	0		1		1
WBGene00012480	clec-104	Y18D10A.10	chrI	1	12859489	12861283				1	1	1	1	1			1	1					1				0	0	0	0	0		1	1	1
WBGene00022072	cpg-9	Y67D8C.8	chrIV	-1	3067843	3069844		1															1				0	0	0	0	0
WBGene00000802	crt-1	Y38A10A.5	chrV	-1	6098976	6100536			1														1				1	0	0	0	0			1	1
WBGene00017472	cst-1	F14H12.4	chrX	1	4339620	4343676			1							1		1					1				0	0	0	0	0
WBGene00016038	cst-2	C24A8.4	chrX	-1	4333124	4336010			1							1							1				0	0	0	0	0
WBGene00017122	E04F6.2	E04F6.2	chrII	1	7200570	7201841			1														1				0	0	0	0	0
WBGene00017126	E04F6.6	E04F6.6	chrII	-1	7197354	7199524			1														1				0	0	0	0	0
WBGene00001235	elb-1	Y41C4A.10	chrIII	-1	11718736	11719352	CEOP3728			1													1				0	0	0	0	0			1	1
WBGene00017287	F09E5.9	F09E5.9	chrII	1	5346590	5347397			1														1				0	0	0	0	0		1	1	1
WBGene00008674	F11A5.6	F11A5.6	chrV	-1	16203920	16204066				1													1				0	0	0	0	0
WBGene00018213	F39H12.2	F39H12.2	chrX	1	830257	833801		1						1									1				0	0	1	0	0
WBGene00009677	F44A6.5	F44A6.5	chrX	-1	10217246	10218700			1														1				0	0	0	0	0
WBGene00009997	F53F4.15	F53F4.15	chrV	1	13621055	13621394			1														1				0	0	0	0	0
WBGene00010051	F54D5.5	F54D5.5	chrII	-1	11564379	11566954			1														1				1	0	0	0	0			1
WBGene00001495	frm-9	F31B12.3	chrX	-1	10816903	10838585			1														1				0	0	0	0	0
WBGene00019589	K09F6.6	K09F6.6	chrII	-1	2274881	2279151		1						1		1							1				0	0	0	0	0						1
WBGene00004147	larp-5	T12F5.5	chrI	-1	3732883	3740482			1														1				0	0	0	0	0			1	1
WBGene00015648	orai-1	C09F5.2	chrIII	1	647123	654460		1				1		1		1		1					1				0	0	0	0	0		1		1
WBGene00012329	sre-44	W07G1.2	chrII	1	13949516	13951795				1													1				0	1	0	0	0		1
WBGene00006055	ssr-2	C14A11.7	chrX	-1	2823282	2826819			1					1				1					1				0	0	0	0	0
WBGene00006243	str-210	F26G5.11	chrV	-1	4945648	4948285		1															1				0	0	0	0	0
WBGene00012049	T26E4.7	T26E4.7	chrV	1	15793834	15795175				1													1				0	0	0	0	0
WBGene00012074	T27A8.2	T27A8.2	chrX	-1	16057652	16059051			1					1									1				0	0	0	0	0
WBGene00006702	ubc-3	Y71G12B.15	chrI	1	1698096	1701132	CEOP1020	1			1	1		1				1					1				0	0	0	0	0		1	1	1
WBGene00022448	Y110A2AL.13	Y110A2AL.13	chrII	-1	2886382	2889009	CEOP2072	1								1							1				0	0	0	0	0		1		1
WBGene00021329	Y34D9A.3	Y34D9A.3	chrI	1	1034475	1040871	CEOP1908	1			1	1	1	1		1		1					1				1	0	0	0	0		1	1	1	1		1
WBGene00012757	Y41C4A.11	Y41C4A.11	chrIII	1	11719800	11723502				1							1						1				0	0	0	0	0		1	1	1		1		1
WBGene00044155	Y7A5A.11	Y7A5A.11	chrX	1	15811790	15814969			1														1				0	0	0	0	0
WBGene00022398	Y97E10AR.3	Y97E10AR.3	chrV	-1	8006159	8007492	CEOP5554		1														1				0	0	0	0	0
WBGene00022711	ZK355.1	ZK355.1	chrII	1	2930732	2933467		1					1	1									1				0	0	0	0	0
WBGene00005386	srh-170	R08H2.3	chrV	-1	15386906	15388853			1							1		1	1	1	1	1					0	0	0	0	0		1
WBGene00044376	Y49F6B.12	Y49F6B.12	chrII	-1	3472078	3472419		1											1		1	1					0	0	0	0	0
WBGene00021718	Y49F6B.6	Y49F6B.6	chrII	1	3472882	3473292		1											1		1	1					0	0	0	0	0
WBGene00050907	Y51A2B.9	Y51A2B.9	chrV	-1	18395310	18395721				1									1		1	1					0	0	0	0	0
WBGene00050897	C47A10.13	C47A10.13	chrV	1	17789468	17789712				1											1	1					0	0	0	0	0
WBGene00194643	C48D1.9	C48D1.9	chrIV	-1	13207366	13209664				1	1	1			1	1	1	1			1	1					0	0	0	0	0
WBGene00023504	F26F2.8	F26F2.8	chrV	1	20579534	20580647				1								1			1	1					0	0	0	0	0
WBGene00077602	F35E8.15	F35E8.15	chrV	-1	15911545	15911660				1											1	1					0	0	0	0	0
WBGene00009463	F36D1.4	F36D1.4	chrI	1	11271700	11272378				1											1	1					0	0	0	0	0
WBGene00014750	F36D3.11	F36D3.11	chrV	1	16531953	16532669				1											1	1					0	0	0	0	0
WBGene00044782	F41D3.13	F41D3.13	chrI	-1	12263693	12264267				1											1	1					0	0	0	0	0
WBGene00045387	K09H9.8	K09H9.8	chrI	-1	3138541	3140603		1			1	1			1	1	1	1			1	1					0	0	0	0	0
WBGene00012845	set-24	Y43F11A.5	chrII	-1	12114902	12130904	CEOP2590			1	1				1	1		1			1	1					0	0	0	0	0		1
WBGene00189931	Y26G10.6	Y26G10.6	chrV	1	17699933	17700348				1											1	1					0	0	0	0	0
WBGene00012715	Y39E4B.2	Y39E4B.2	chrIII	-1	13165111	13169419				1	1	1			1	1	1	1			1	1					0	0	0	0	0	1		1		1	1	1
WBGene00013543	Y75B8A.6	Y75B8A.6	chrIII	-1	12123972	12130238				1		1				1		1			1	1					0	0	0	0	0
WBGene00016550	C40A11.7	C40A11.7	chrII	-1	2148811	2150315		1											1	1		1					0	0	0	0	0						1
WBGene00007000	tufm-1	Y71H2AM.23	chrIII	-1	2811449	2814963		1											1	1		1					0	0	1	0	0		1	1	1
WBGene00008681	scrm-4	F11A6.2	chrI	-1	11680495	11682355				1										1		1					0	0	0	0	0						1
WBGene00006172	str-121	R02C2.5	chrV	-1	252365	254667		1											1			1					0	0	0	0	0						1
WBGene00015172	B0410.3	B0410.3	chrX	-1	2890566	2891483			1													1					0	0	0	0	0
WBGene00050944	C14A11.9	C14A11.9	chrX	-1	2807901	2809623			1													1					0	0	0	0	0
WBGene00007601	C15C6.2	C15C6.2	chrI	1	12203791	12205800				1	1	1	1		1	1	1					1					0	0	0	0	0					1
WBGene00015823	C16B8.3	C16B8.3	chrX	-1	3968016	3968617			1													1					0	0	1	0	0						1
WBGene00007634	C16D6.1	C16D6.1	chrX	-1	12525275	12525714			1													1					0	0	0	0	0
WBGene00000408	cdk-7	Y39G10AL.3	chrI	-1	2280917	2291185		1			1				1	1						1					1	0	0	0	0			1	1
WBGene00000739	col-166	T07H6.3	chrX	1	6279639	6280983			1													1					0	0	0	0	0
WBGene00008701	F11D11.6	F11D11.6	chrV	-1	18752454	18753108				1												1					0	0	0	0	0
WBGene00017568	F18E9.1	F18E9.1	chrX	1	8599888	8602220			1													1					0	0	0	0	0
WBGene00017631	F20B6.7	F20B6.7	chrX	-1	4206806	4207453			1													1					0	0	0	0	0
WBGene00009465	F36D1.6	F36D1.6	chrI	-1	11269919	11271218				1												1					0	0	0	0	0
WBGene00018462	F45E1.1	F45E1.1	chrX	1	8003635	8008827			1													1					0	0	1	0	0
WBGene00018463	F45E1.2	F45E1.2	chrX	1	8003686	8004030			1													1					0	0	0	0	0
WBGene00018730	F53A9.7	F53A9.7	chrX	-1	8716482	8716947			1													1					0	0	0	0	0
WBGene00013232	faah-4	Y56A3A.12	chrIII	-1	11899239	11907287	CEOP3736			1	1	1			1	1	1	1				1					0	0	0	0	0
WBGene00012065	fbxb-2	T26H2.3	chrV	-1	19236062	19237269				1												1					0	0	0	0	0
WBGene00016337	fbxb-38	C33C12.5	chrII	-1	2167393	2168764		1														1					0	0	0	0	0		1
WBGene00001579	gex-2	F56A11.1	chrIV	1	572723	583731		1									1	1				1					0	0	0	0	0
WBGene00017668	ins-39	F21E9.4	chrX	-1	1343832	1344405		1														1					0	0	0	0	0		1
WBGene00010536	K03D7.9	K03D7.9	chrV	-1	17487320	17488807				1												1					0	0	0	0	0
WBGene00010573	K04H4.2	K04H4.2	chrIII	-1	9347630	9355396	CEOP3574		1													1					0	0	1	0	0
WBGene00010691	K08H2.4	K08H2.4	chrX	1	13238582	13239934			1													1					0	0	0	0	0
WBGene00019670	K12B6.6	K12B6.6	chrV	-1	6293903	6294325			1													1					0	0	0	0	0
WBGene00009799	lgc-47	F47A4.1	chrX	-1	9801031	9807604			1													1					0	0	1	0	0
WBGene00019827	mop-25.1	R02E12.2	chrX	1	4012209	4022187			1													1					1	0	0	0	0
WBGene00003675	nhr-85	W05B5.3	chrI	-1	13056080	13062111				1	1				1							1					0	0	0	0	0
WBGene00019986	R09F10.1	R09F10.1	chrX	1	8323540	8324991			1													1					0	0	1	0	0
WBGene00005375	srh-159	F40D4.3	chrV	1	17182321	17183600				1												1					0	0	0	0	0
WBGene00005409	srh-198	ZK262.13	chrV	-1	18417721	18419865				1			1									1					0	0	0	0	0		1
WBGene00011609	T08D2.4	T08D2.4	chrX	1	177396	177856	CEOPX004	1														1					0	0	0	0	0
WBGene00077632	T27C5.16	T27C5.16	chrV	-1	17407949	17408358				1												1					0	0	0	0	0
WBGene00077633	T27C5.17	T27C5.17	chrV	1	17408412	17408618				1												1					0	0	0	0	0
WBGene00016937	tag-294	C54H2.3	chrX	-1	5760254	5763341			1													1					0	0	1	0	0
WBGene00194951	Y105C5A.1274	Y105C5A.1274	chrIV	1	15634707	15634895				1												1					0	0	0	0	0
WBGene00013751	Y113G7A.14	Y113G7A.14	chrV	-1	20135941	20138418				1												1					0	0	0	0	0
WBGene00021268	Y23B4A.2	Y23B4A.2	chrX	1	5919659	5920462			1													1					0	0	0	0	0
WBGene00012908	Y46G5A.18	Y46G5A.18	chrII	-1	12800346	12805193				1	1					1		1				1					0	0	0	0	0		1		1
WBGene00021640	Y47G6A.14	Y47G6A.14	chrI	-1	3462270	3468189		1			1					1		1				1					0	0	0	0	0	1	1
WBGene00012958	Y47H10A.2	Y47H10A.2	chrI	-1	12085018	12087821				1												1					0	0	0	0	0
WBGene00021732	Y49G5B.1	Y49G5B.1	chrV	1	5223407	5229671			1									1				1					0	0	0	0	0
WBGene00194649	Y57G11C.1130	Y57G11C.1130	chrIV	1	14782800	14783285				1												1					0	0	0	0	0		1
WBGene00013426	Y66A7A.7	Y66A7A.7	chrIII	-1	11628286	11630914				1	1	1			1	1	1	1				1					0	0	0	0	0
WBGene00012420	Y7A9D.1	Y7A9D.1	chrIV	-1	16381344	16382179				1												1					0	0	1	0	0
WBGene00022336	Y82E9BR.3	Y82E9BR.3	chrIII	1	1419181	1419906		1														1					1	0	0	0	0				1
WBGene00022729	ZK402.2	ZK402.2	chrX	1	1403739	1404112		1														1					0	0	0	0	0
WBGene00008862	F15D4.5	F15D4.5	chrII	1	13245360	13247706				1				1		1				1	1						0	0	0	0	0						1
WBGene00022273	Y73E7A.6	Y73E7A.6	chrI	-1	1607681	1610136		1											1		1						0	0	0	0	0		1		1
WBGene00013168	arp-1	Y53F4B.22	chrII	1	15120223	15123270				1	1	1		1	1	1		1			1						1	0	0	0	0		1		1
WBGene00007148	B0334.10	B0334.10	chrII	1	11518424	11519507			1						1		1	1			1						0	0	0	0	0						1
WBGene00018668	bath-2	F52C6.11	chrII	-1	1921453	1922749		1			1			1		1		1			1						0	0	0	0	0
WBGene00018658	bath-22	F52C6.1	chrII	1	1927884	1928739		1			1					1		1			1						0	0	0	0	0
WBGene00021727	bath-23	Y49F6C.5	chrII	1	3371313	3372148		1													1						0	0	0	0	0
WBGene00086552	C17D12.9	C17D12.9	chrI	-1	11621567	11621890				1											1						0	0	0	0	0
WBGene00007673	C18D4.3	C18D4.3	chrV	-1	17532327	17532760				1											1						0	0	0	0	0
WBGene00016515	C38C3.7	C38C3.7	chrV	-1	1501420	1504299		1													1						0	0	0	0	0						1
WBGene00010928	clec-258	M162.2	chrV	1	19788650	19789313				1											1						0	0	0	0	0
WBGene00018261	cyp-33C5	F41B5.3	chrV	1	2245014	2247024		1													1						0	0	0	0	0
WBGene00017209	F07E5.4	F07E5.4	chrII	-1	2050028	2051684		1													1						0	0	0	0	0
WBGene00077659	F11D11.19	F11D11.19	chrV	-1	18767726	18768386				1											1						0	0	0	0	0
WBGene00017522	F16G10.7	F16G10.7	chrII	-1	2379584	2380279		1													1						0	0	0	0	0
WBGene00017610	F19G12.2	F19G12.2	chrX	1	1427769	1430866		1						1							1						0	0	0	0	0
WBGene00017918	F29A7.8	F29A7.8	chrII	-1	2757467	2758194		1													1						0	0	0	0	0
WBGene00009464	F36D1.5	F36D1.5	chrI	1	11266062	11266471				1											1						0	0	0	0	0
WBGene00018242	F40G9.6	F40G9.6	chrIII	1	179541	180346		1													1						0	0	0	0	0		1
WBGene00009747	F46A8.4	F46A8.4	chrI	-1	11241217	11241962				1											1						0	0	0	0	0
WBGene00009752	F46A8.9	F46A8.9	chrI	1	11252230	11252973				1											1						0	0	0	0	0
WBGene00018551	F47C12.8	F47C12.8	chrIV	-1	3996230	3998601		1													1						0	0	0	0	0						1
WBGene00018723	F53A3.7	F53A3.7	chrIII	1	1951470	1952023	CEOP3845	1													1						0	0	0	0	0		1		1
WBGene00010248	F58D5.9	F58D5.9	chrI	-1	12045227	12046584				1	1	1			1		1	1			1						0	0	0	0	0		1		1
WBGene00010269	F58G1.7	F58G1.7	chrII	-1	12943779	12948074				1	1	1			1	1	1	1			1						0	0	0	0	0					1	1
WBGene00022494	fbxa-91	Y119D3B.18	chrIII	-1	1253376	1254393		1													1						0	0	0	0	0
WBGene00022557	fbxb-15	ZC204.7	chrII	-1	1652466	1653503		1													1						0	0	0	0	0
WBGene00001636	gly-11	Y75B8A.9	chrIII	-1	12171251	12177144				1	1				1	1		1			1						0	0	0	0	0		1
WBGene00044643	H17B01.5	H17B01.5	chrII	-1	1472919	1473567		1													1						0	0	0	0	0		1
WBGene00002102	ins-19	T10D4.13	chrII	-1	3126035	3126444		1													1						0	0	0	0	0
WBGene00086563	K08C9.9	K08C9.9	chrI	-1	11498390	11498705				1											1						0	0	0	0	0
WBGene00019548	K09C4.2	K09C4.2	chrX	1	3297644	3298019			1												1						0	0	0	0	0
WBGene00077666	M162.13	M162.13	chrV	-1	19771105	19771268				1											1						0	0	0	0	0
WBGene00015827	math-13	C16C4.3	chrII	1	1875963	1877242		1													1						0	0	0	0	0
WBGene00012199	mltn-3	W02B8.3	chrII	1	13916281	13919603				1											1						0	0	0	0	0
WBGene00017961	nhr-180	F31F4.12	chrV	-1	665921	667495		1													1						0	0	0	0	0
WBGene00018622	nhr-190	F48G7.11	chrV	-1	640798	642894		1													1						0	0	0	0	0
WBGene00011651	nhr-217	T09E11.2	chrI	1	12341136	12342817				1											1						0	0	0	0	0
WBGene00003770	nlp-32	F30H5.2	chrIII	-1	486121	486545		1													1						0	0	0	0	0
WBGene00009615	oac-25	F41D3.10	chrI	-1	12269246	12272181				1											1						0	0	0	0	0
WBGene00019861	R04A9.1	R04A9.1	chrX	1	404898	405358		1													1						0	0	0	0	0
WBGene00008782	sdz-14	F14B6.1	chrI	-1	12216240	12217757				1											1						0	0	0	0	0
WBGene00005374	srh-158	F20E11.13	chrV	1	17442556	17445643				1											1						0	0	0	0	0
WBGene00005228	srh-2	C05E4.14	chrV	1	728310	734280		1													1						0	1	1	0	0
WBGene00016857	srt-16	C50H11.11	chrV	-1	3063158	3064915		1			1			1	1	1		1			1						0	0	0	0	0
WBGene00018114	srt-41	F36H9.6	chrV	-1	1799725	1808430		1													1						0	1	0	0	0
WBGene00005833	srw-86	C25F9.7	chrV	-1	19400113	19400686				1											1						0	1	0	0	0
WBGene00020150	T01D1.5	T01D1.5	chrII	-1	187371	189202		1													1						0	0	0	0	0
WBGene00011395	T03E6.2	T03E6.2	chrV	-1	16581016	16583154				1											1						0	0	0	0	0		1
WBGene00020248	T05C1.1	T05C1.1	chrII	1	4478613	4480784			1												1						0	0	0	0	0
WBGene00020774	T24E12.5	T24E12.5	chrII	1	3753924	3757359		1													1						0	0	0	0	0					1	1
WBGene00006533	tba-7	T28D6.2	chrIII	-1	11368315	11371675				1	1	1		1	1	1	1	1			1						0	0	0	0	0		1				1
WBGene00012240	W04A8.5	W04A8.5	chrI	-1	13849606	13850856				1											1						0	0	0	0	0						1
WBGene00021086	W08E12.5	W08E12.5	chrIV	1	3300821	3301297		1													1						0	0	0	0	0
WBGene00022440	Y110A2AL.3	Y110A2AL.3	chrII	1	2867079	2867784		1													1						0	0	0	0	0
WBGene00014976	Y116A8C.7	Y116A8C.7	chrIV	1	16928301	16929034				1											1						0	0	0	0	0
WBGene00012455	Y17D7C.1	Y17D7C.1	chrV	1	18707956	18708335				1											1						0	0	0	0	0
WBGene00021243	Y22D7AL.3	Y22D7AL.3	chrIII	1	1641454	1641726		1													1						0	0	0	0	0
WBGene00021289	Y25C1A.2	Y25C1A.2	chrII	1	3112616	3113206		1													1						0	0	0	0	0				1
WBGene00012550	Y37D8A.10	Y37D8A.10	chrIII	1	12874906	12875682				1											1						1	0	0	0	0		1	1	1
WBGene00014885	Y39G8B.8	Y39G8B.8	chrII	-1	13992935	13993453				1											1						0	0	0	0	0
WBGene00013133	Y53C10A.2	Y53C10A.2	chrI	-1	11967645	11969809				1	1	1		1	1	1		1			1						0	0	0	0	0
WBGene00021928	Y55F3AM.11	Y55F3AM.11	chrIV	-1	1038669	1041008		1			1	1		1	1	1	1	1			1						0	0	0	0	0		1
WBGene00013265	Y57A10A.25	Y57A10A.25	chrII	-1	12251672	12256563	CEOP2596			1	1				1	1					1						0	0	0	0	0		1
WBGene00013442	Y66D12A.16	Y66D12A.16	chrIII	1	11524277	11526464	CEOP3885			1	1			1		1		1			1						0	0	0	0	0		1
WBGene00022079	Y69A2AR.8	Y69A2AR.8	chrIV	1	2596332	2596836		1													1						0	0	0	0	0
WBGene00077459	Y6G8.10	Y6G8.10	chrV	1	17603159	17603919				1											1						0	0	0	0	0
WBGene00017125	acdh-12	E04F6.5	chrII	-1	7192385	7194774			1										1	1							1	0	0	0	0		1
WBGene00007197	B0513.5	B0513.5	chrIV	-1	13868529	13876592				1					1				1	1							0	0	0	0	0		1		1
WBGene00022473	bet-1	Y119C1B.8	chrI	-1	4526379	4534801			1										1	1							1	0	0	0	0
WBGene00015320	C02B8.1	C02B8.1	chrX	1	8147661	8148539			1										1	1							0	0	0	0	0	1	1		1
WBGene00007270	C03C10.4	C03C10.4	chrIII	-1	4096875	4098107			1										1	1							0	0	0	0	0	1
WBGene00015499	C06A5.1	C06A5.1	chrI	1	6012060	6021985	CEOP1288		1										1	1							0	0	0	0	0			1	1	1		1
WBGene00014672	C08F11.6	C08F11.6	chrIV	-1	13636536	13636951				1									1	1							0	0	0	0	0
WBGene00007454	C08F11.7	C08F11.7	chrIV	1	13637264	13638501				1									1	1							0	0	0	0	0	1				1	1
WBGene00015731	C13B7.6	C13B7.6	chrV	1	2421866	2422894		1											1	1							0	0	0	0	0			1
WBGene00007578	C14B1.7	C14B1.7	chrIII	-1	3719886	3723579	CEOP3140	1											1	1							0	0	0	0	0
WBGene00194998	C16C4.18	C16C4.18	chrII	-1	1860633	1861085		1											1	1							0	0	0	0	0		1		1
WBGene00016632	C44B7.12	C44B7.12	chrII	-1	6891533	6893591	CEOP2730		1										1	1							0	0	0	0	0	1	1			1	1
WBGene00012553	cco-2	Y37D8A.14	chrIII	1	12905388	12906513				1									1	1							1	0	0	0	0		1	1	1
WBGene00016993	CD4.8	CD4.8	chrV	-1	5598962	5601313			1										1	1							0	0	0	0	0					1	1
WBGene00022854	cin-4	ZK1127.7	chrII	1	7038252	7041647			1										1	1							0	0	0	0	0
WBGene00008891	clec-42	F16H6.1	chrV	1	18191415	18194234				1			1	1			1		1	1							0	0	0	0	0						1
WBGene00000765	coq-5	ZK652.9	chrIII	-1	7857242	7858392	CEOP3456		1										1	1							0	0	0	0	0
WBGene00044329	cpsf-4	F11A10.8	chrIV	-1	12092298	12093450	CEOP4490			1									1	1							1	0	0	0	0	1
WBGene00000962	dhc-1	T21E12.4	chrI	1	4386788	4403645	CEOP1994		1										1	1							1	0	0	0	0		1		1
WBGene00001110	duo-1	F38B7.5	chrV	1	11554784	11558108			1										1	1							0	0	0	0	0	1		1		1	1	1
WBGene00009469	F36D3.1	F36D3.1	chrV	1	16499331	16502856				1									1	1							0	0	0	0	0			1	1	1		1
WBGene00018203	F39F10.3	F39F10.3	chrX	1	16891918	16893075			1				1	1	1		1		1	1							0	0	0	0	0
WBGene00018537	F47B7.6	F47B7.6	chrX	-1	3769637	3770627			1					1	1		1		1	1							0	0	0	0	0		1
WBGene00023067	F54D7.6	F54D7.6	chrI	1	4789234	4789593			1										1	1							0	0	0	0	0				1
WBGene00018917	F56A4.9	F56A4.9	chrV	-1	2456175	2458285		1											1	1							0	0	0	0	0
WBGene00001394	fat-2	W02A2.1	chrIV	1	13323826	13326370				1									1	1							0	0	0	0	0
WBGene00018807	fbxa-146	F54D10.6	chrII	-1	3814378	3815460		1											1	1							0	0	0	0	0				1	1
WBGene00018803	fbxa-24	F54D10.2	chrII	1	3816518	3818240		1											1	1							0	0	0	0	0				1		1		1
WBGene00016885	fbxb-97	C52E2.6	chrII	-1	1846596	1848159		1									1		1	1							0	0	0	0	0
WBGene00015830	fbxb-98	C16C4.6	chrII	1	1862639	1863787		1											1	1							0	0	0	0	0		1		1
WBGene00001688	gpr-1	F22B7.13	chrIII	1	8628855	8630697	CEOP3875		1										1	1							0	0	0	0	0		1	1	1	1		1
WBGene00010317	idh-1	F59B8.2	chrIV	-1	9439070	9440790			1										1	1							1	0	0	0	0			1	1
WBGene00002147	ire-1	C41C4.4	chrII	-1	8112202	8124788			1										1	1							1	0	0	0	0			1	1
WBGene00019400	K04G7.1	K04G7.1	chrIII	1	7162632	7164898			1										1	1							0	0	0	0	0		1	1	1
WBGene00019402	K04G7.11	K04G7.11	chrIII	-1	7159100	7162055	CEOP3412		1										1	1							0	0	0	0	0		1	1	1
WBGene00010665	K08E3.5	K08E3.5	chrIII	-1	13763963	13767993				1									1	1							1	0	0	0	0
WBGene00003045	lir-2	F18A1.4	chrII	1	7667943	7671855	CEOP2300		1										1	1							1	0	0	0	0			1	1
WBGene00003085	lst-3	Y37A1B.1	chrIV	1	14071350	14076719	CEOP4576			1									1	1							1	0	0	0	0		1		1
WBGene00010840	M03C11.3	M03C11.3	chrIII	1	10404976	10414606	CEOP3670		1										1	1							0	0	0	0	0			1
WBGene00017123	maoc-1	E04F6.3	chrII	1	7196235	7197472			1										1	1							0	0	1	0	0		1
WBGene00007022	mdt-22	ZK970.3	chrII	1	10301103	10301828			1										1	1							1	0	0	0	0		1	1	1
WBGene00003656	nhr-66	T09A12.4	chrIV	-1	8226327	8236588			1										1	1							1	0	0	0	0						1
WBGene00012128	nra-1	T28F3.1	chrIV	-1	17281418	17284164				1									1	1							1	0	0	0	0		1
WBGene00004186	prpf-4	F22D6.5	chrI	-1	7091316	7094747			1										1	1							1	0	0	0	0
WBGene00004380	rnf-1	C06A5.9	chrI	-1	6009783	6011525			1										1	1							0	0	0	0	0	1		1	1	1		1
WBGene00004491	rps-22	F53A3.3	chrIII	1	1950483	1951418	CEOP3845	1					1						1	1							1	0	0	0	0		1	1	1
WBGene00017016	snap-1	D1014.3	chrV	1	8130346	8133311	CEOP5180		1										1	1							1	0	0	0	0				1
WBGene00005006	spr-1	D1014.8	chrV	-1	8126643	8129332			1										1	1							0	0	0	0	0				1
WBGene00021568	srt-2	Y45G12C.5	chrV	1	2544003	2546062		1											1	1							0	0	0	0	0
WBGene00006375	syp-1	F26D2.2	chrV	1	16405743	16407684				1									1	1							0	0	0	0	0	1				1	1
WBGene00020783	T24H7.4	T24H7.4	chrII	1	6245100	6246226	CEOP2238		1										1	1							0	0	0	0	0	1		1	1
WBGene00044324	tag-277	ZK652.3	chrIII	1	7858866	7859448	CEOP3460		1										1	1							0	0	0	0	0
WBGene00021091	W08F4.1	W08F4.1	chrII	1	593520	593859		1											1	1							0	0	0	0	0			1
WBGene00021222	Y19D10A.7	Y19D10A.7	chrV	-1	2348214	2350324		1											1	1							0	0	0	0	0
WBGene00044131	Y45G12C.16	Y45G12C.16	chrV	1	2530145	2531173		1											1	1							0	0	0	0	0			1
WBGene00021813	Y53G8AR.6	Y53G8AR.6	chrIII	1	3294734	3296597	CEOP3104	1											1	1							0	0	0	0	0		1		1
WBGene00021916	Y55D5A.2	Y55D5A.2	chrIII	1	2968958	2969869		1											1	1							0	0	0	0	0					1	1
WBGene00013248	Y57A10A.3	Y57A10A.3	chrII	1	12150828	12151822	CEOP2592			1									1	1							0	0	0	0	0	1	1				1
WBGene00022107	Y71F9AL.1	Y71F9AL.1	chrI	1	2924934	2928140		1											1	1							0	0	0	0	0	1					1
WBGene00014022	ZK637.2	ZK637.2	chrIII	1	8887669	8890065	CEOP3552		1										1	1							0	0	0	0	0				1
WBGene00014987	ZK637.6	ZK637.6	chrIII	-1	8898904	8899449	CEOP3878		1										1	1							0	0	0	0	0
WBGene00006994	zyg-9	F22B5.7	chrII	1	8457767	8464514	CEOP2348		1										1	1							1	0	0	0	0			1	1
WBGene00015883	C17B7.9	C17B7.9	chrV	-1	3330912	3332110		1												1							0	0	0	0	0
WBGene00015899	C17E7.4	C17E7.4	chrV	1	3892841	3894561		1					1	1	1		1			1							0	0	0	0	0
WBGene00016125	C26B2.2	C26B2.2	chrIV	-1	8021135	8021982			1											1							0	0	0	0	0
WBGene00016308	C32B5.15	C32B5.15	chrII	-1	970652	972957		1												1							0	0	0	0	0						1
WBGene00019357	cpg-8	K03B4.7	chrV	-1	4691586	4692419		1												1							0	0	0	0	0				1
WBGene00000889	cyn-13	Y116A8C.34	chrIV	-1	17111046	17116633	CEOP4596			1	1					1				1							1	0	0	0	0
WBGene00011730	drr-2	T12D8.2	chrIII	-1	13642318	13643475	CEOP3818			1										1							1	0	0	0	0		1	1	1
WBGene00008531	F02E9.7	F02E9.7	chrI	1	8413254	8416190	CEOP1980		1											1							0	0	0	0	0		1
WBGene00008959	F19H6.4	F19H6.4	chrX	1	12365620	12367195			1					1				1		1							0	0	0	0	0
WBGene00008960	F19H6.5	F19H6.5	chrX	-1	12363645	12364836			1					1		1				1							0	0	0	0	0
WBGene00009119	F25H2.5	F25H2.5	chrI	-1	10553101	10553902			1											1							1	0	0	0	0		1	1	1
WBGene00009120	F25H2.6	F25H2.6	chrI	1	10554355	10558039	CEOP1620		1											1							1	0	0	0	0		1	1	1
WBGene00009224	F28F8.7	F28F8.7	chrV	-1	15579074	15580827	CEOP5444			1				1	1	1	1	1		1							0	0	0	0	0		1			1	1
WBGene00018112	F36H9.4	F36H9.4	chrV	-1	1776172	1779131		1												1							0	0	0	0	0
WBGene00018235	F40E12.2	F40E12.2	chrII	1	3610412	3615438		1												1							0	0	0	0	0
WBGene00018565	F47E1.1	F47E1.1	chrX	1	9073745	9077669			1		1				1	1	1	1		1							0	0	0	0	0		1				1
WBGene00017254	fbxb-111	F08D12.11	chrII	-1	2773959	2775047		1					1							1							0	0	0	0	0
WBGene00001916	his-42	F08G2.3	chrII	-1	13828218	13828628				1										1							0	0	0	0	0		1
WBGene00010585	K05C4.9	K05C4.9	chrI	-1	14726867	14730708				1										1							0	0	0	0	0		1				1
WBGene00019496	K07E8.5	K07E8.5	chrII	1	651934	654069		1												1							0	0	0	0	0
WBGene00044514	R09E12.9	R09E12.9	chrV	1	777572	778236		1												1							0	0	0	0	0
WBGene00004411	rpc-1	C42D4.8	chrIV	-1	7160117	7165702			1											1							0	0	0	0	0			1	1
WBGene00011729	set-16	T12D8.1	chrIII	1	13643817	13656684				1	1									1							1	0	0	0	0		1	1	1
WBGene00015730	srt-1	C13B7.1	chrV	1	2435724	2437783		1												1							0	1	0	0	0
WBGene00006149	str-90	F58G4.2	chrV	1	8102464	8106885			1											1							0	0	0	0	0
WBGene00011599	T07G12.8	T07G12.8	chrIV	1	10553329	10554148	CEOP4384		1											1							0	0	0	0	0	1	1		1	1	1		1
WBGene00020396	T10B5.10	T10B5.10	chrV	-1	1851084	1856275		1					1	1						1							0	0	0	0	0
WBGene00020389	T10B5.3	T10B5.3	chrV	-1	1864180	1868566		1			1				1	1	1	1		1							1	0	0	0	0		1	1	1
WBGene00020557	T19B4.3	T19B4.3	chrI	1	5678634	5679866	CEOP1280		1											1							0	0	0	0	0	1
WBGene00011850	T20B3.1	T20B3.1	chrV	1	16815545	16820693				1										1							0	0	1	0	0
WBGene00006545	tbx-8	T07C4.2	chrIII	1	10347481	10349646			1											1							0	0	0	0	0
WBGene00014848	VM106R.1	VM106R.1	chrII	-1	10827652	10829798			1					1	1	1	1	1		1							0	0	0	0	0
WBGene00044213	Y102A5C.36	Y102A5C.36	chrV	-1	16926903	16927827				1				1						1							0	0	0	0	0
WBGene00012551	Y37D8A.11	Y37D8A.11	chrIII	-1	12875105	12877476				1										1							0	0	0	0	0		1		1	1	1		1
WBGene00012601	Y38E10A.23	Y38E10A.23	chrII	-1	12677119	12677729				1										1							0	0	0	0	0				1
WBGene00045062	Y38H8A.8	Y38H8A.8	chrIV	-1	13456952	13460229				1										1							0	0	0	0	0
WBGene00021438	Y39A3B.3	Y39A3B.3	chrIII	1	1985099	1987456		1			1									1							0	0	0	0	0
WBGene00012694	Y39B6A.36	Y39B6A.36	chrV	1	18993911	18998176	CEOP5480			1	1					1				1							1	0	0	0	0		1
WBGene00189949	Y48G1C.13	Y48G1C.13	chrI	-1	94958	95367		1												1							0	0	0	0	0
WBGene00021700	Y48G9A.6	Y48G9A.6	chrIII	1	2117832	2119081		1			1			1	1					1							0	0	0	0	0
WBGene00021713	Y49F6A.5	Y49F6A.5	chrII	-1	3607940	3609864		1												1							0	0	0	0	0
WBGene00195169	Y50D4A.6	Y50D4A.6	chrV	-1	1197817	1199043		1			1				1	1	1	1		1							0	0	0	0	0
WBGene00013051	Y50E8A.8	Y50E8A.8	chrV	1	14757603	14758280			1											1							0	0	0	0	0
WBGene00013325	Y57G11C.36	Y57G11C.36	chrIV	-1	14770624	14773503	CEOP4644			1										1							0	0	0	0	0
WBGene00013479	Y69H2.1	Y69H2.1	chrV	-1	18620029	18622514				1			1	1	1	1	1	1		1							0	0	0	0	0
WBGene00022124	Y71F9AR.3	Y71F9AR.3	chrI	-1	2986109	2995915	CEOP1943	1								1				1							0	0	0	0	0		1	1	1		1		1
WBGene00022275	Y74C9A.1	Y74C9A.1	chrI	1	43733	44677		1							1	1	1			1							0	0	0	0	0
WBGene00022846	ZK1055.5	ZK1055.5	chrV	1	6580826	6584373			1											1							0	0	0	0	0
WBGene00019433	acdh-3	K06A5.6	chrI	-1	6464198	6466943			1										1								1	0	0	0	0		1
WBGene00007091	B0001.6	B0001.6	chrIV	1	12156816	12164252				1									1								1	0	0	0	0		1	1	1
WBGene00007439	C08E8.3	C08E8.3	chrV	1	18350120	18350527				1									1								0	0	0	0	0
WBGene00015734	C13B9.3	C13B9.3	chrIII	-1	6622602	6624919			1										1								1	0	0	0	0				1
WBGene00015903	C17E7.9	C17E7.9	chrV	-1	3889218	3890846	CEOP5044	1				1		1	1	1	1	1	1								0	0	0	0	0
WBGene00007700	C24H11.2	C24H11.2	chrIII	-1	11790436	11792145				1									1								0	0	0	0	0
WBGene00007779	C27D8.3	C27D8.3	chrIV	-1	12706691	12712291				1									1								0	0	0	0	0
WBGene00007785	C27H6.3	C27H6.3	chrV	1	9981261	9982740	CEOP5571		1										1								0	0	0	0	0		1		1
WBGene00016201	C28H8.11	C28H8.11	chrIII	-1	5917583	5920041			1										1								0	0	0	0	0
WBGene00000443	ceh-20	F31E3.1	chrIII	1	6979827	6981733			1										1								0	0	1	0	0
WBGene00000770	cpb-1	C40H1.1	chrIII	1	9322233	9324821			1										1								0	0	0	0	0	1
WBGene00000774	cpf-2	F56A8.6	chrIII	-1	13266839	13268796				1									1								0	0	0	0	0		1	1	1
WBGene00018326	cyp-25A5	F42A6.4	chrIV	-1	3327478	3329642		1											1								0	0	0	0	0		1		1
WBGene00017643	czw-1	F20D12.4	chrIV	-1	7943602	7946807			1										1								0	0	0	0	0		1	1	1
WBGene00001044	dnj-26	Y39C12A.8	chrIV	-1	12251161	12252641				1									1								0	0	0	0	0
WBGene00001119	dyf-3	C04C3.5	chrIV	-1	3396578	3399120		1											1								0	0	1	0	0				1
WBGene00001253	elt-6	F52C12.5	chrIV	1	1917854	1921640	CEOP4050	1				1	1				1		1								0	0	0	0	0
WBGene00077442	F11D11.16	F11D11.16	chrV	-1	18756818	18757650				1				1	1		1		1								0	0	0	0	0
WBGene00008739	F13D12.3	F13D12.3	chrII	1	11720444	11722252			1										1								0	0	0	0	0						1
WBGene00008930	F18A11.3	F18A11.3	chrII	-1	13036275	13036813				1									1								1	0	0	0	0				1
WBGene00017816	F26B1.2	F26B1.2	chrI	1	6317703	6320433			1										1								1	0	0	0	0			1	1
WBGene00009299	F31E9.6	F31E9.6	chrV	-1	17313546	17315100				1									1								0	0	0	0	0
WBGene00009412	F35E2.5	F35E2.5	chrI	-1	11741521	11743942				1			1	1			1		1								0	0	0	0	0
WBGene00009502	F37A8.2	F37A8.2	chrIII	-1	3929531	3931405			1				1	1	1	1		1	1								0	0	0	0	0
WBGene00009508	F37D6.2	F37D6.2	chrI	-1	10475513	10478120	CEOP1926		1										1								0	0	0	0	0
WBGene00018208	F39G3.3	F39G3.3	chrV	1	4731769	4733670		1											1								0	0	0	0	0		1		1
WBGene00019052	F58F6.3	F58F6.3	chrIV	-1	1375368	1376562		1						1	1	1			1								0	0	0	0	0
WBGene00010280	F58G11.2	F58G11.2	chrV	1	13665389	13669276	CEOP5398		1										1								1	0	0	0	0			1		1		1
WBGene00014918	fbxa-123	Y53C10A.14	chrI	1	12008616	12009616	CEOP1936			1									1								0	0	0	0	0		1		1
WBGene00012368	fbxa-93	W09G3.5	chrI	1	13829650	13831595				1									1								0	0	0	0	0
WBGene00001686	gpd-4	F33H1.2	chrII	1	10171211	10172437	CEOP2713		1										1								0	0	0	0	0
WBGene00012020	gyg-2	T25E12.5	chrV	-1	16745085	16746240				1									1								0	0	0	0	0	1	1		1	1	1		1
WBGene00010364	H04D03.3	H04D03.3	chrIII	1	10443052	10444892			1										1								0	0	0	0	0
WBGene00001872	him-14	ZK1127.11	chrII	-1	7064985	7069924			1										1								0	0	0	0	0	1					1
WBGene00019283	K01A2.9	K01A2.9	chrII	-1	315890	316907		1											1								0	0	0	0	0
WBGene00010783	K11H3.6	K11H3.6	chrIII	-1	9847537	9848029			1										1								1	0	0	0	0		1	1	1
WBGene00003021	lin-36	F44B9.6	chrIII	-1	8016585	8020805	CEOP3468		1										1								1	0	0	0	0		1	1	1
WBGene00010911	M106.3	M106.3	chrII	-1	10857413	10860849	CEOP2716		1										1								0	0	0	0	0
WBGene00003224	mes-6	C09G4.5	chrIV	1	8511271	8514709	CEOP4294		1										1								0	0	0	0	0			1	1
WBGene00010757	pad-2	K10G9.3	chrIII	1	10279038	10281385	CEOP3890		1										1								0	0	0	0	0
WBGene00012897	pisy-1	Y46G5A.5	chrII	-1	12736961	12738264	CEOP2600			1									1								1	0	0	0	0			1	1
WBGene00011243	R11D1.2	R11D1.2	chrV	1	12708661	12710683			1										1								0	0	0	0	0
WBGene00004269	rab-6.1	F59B2.7	chrIII	-1	9004477	9005880			1										1								0	0	0	0	0	1
WBGene00004298	rad-54	W06D4.6	chrI	1	9065080	9070279			1										1								0	0	0	0	0				1
WBGene00004352	rgs-9	ZC53.7	chrX	1	1915259	1917078	CEOPX183	1					1	1	1		1		1								0	0	0	1	0
WBGene00004378	rme-8	F18C12.2	chrI	1	8083576	8095603	CEOP1452		1										1								1	0	0	0	0		1	1	1
WBGene00004446	rpl-32	T24B8.1	chrII	-1	9056438	9057050			1										1								1	0	0	0	0		1	1	1
WBGene00004506	rpt-6	Y49E10.1	chrIII	1	12370353	12372524				1									1								1	0	0	0	0		1		1
WBGene00013260	rsr-2	Y57A10A.19	chrII	1	12225294	12227558	CEOP2720			1									1								0	0	0	0	0				1
WBGene00007784	ruvb-1	C27H6.2	chrV	-1	9978767	9980745			1										1								1	0	0	0	0		1		1
WBGene00006503	snx-3	W06D4.5	chrI	-1	9063708	9064391	CEOP1528		1										1								0	0	0	0	0				1	1	1		1
WBGene00005345	srh-128	Y47G7B.1	chrII	-1	2703376	2705321		1				1	1	1		1	1	1	1								0	0	0	0	0		1
WBGene00005498	srh-294	K08G2.10	chrV	1	15865069	15865792				1									1								0	0	0	0	0
WBGene00005836	srw-89	K09D9.13	chrV	1	4017065	4019011		1											1								0	0	0	0	0
WBGene00011606	T08D2.1	T08D2.1	chrX	-1	162529	163134		1											1								0	0	0	0	0		1		1
WBGene00020493	T13G4.6	T13G4.6	chrX	-1	1202376	1203226		1				1	1	1	1	1	1	1	1								0	0	0	0	0
WBGene00011909	T22A3.6	T22A3.6	chrI	1	10594463	10598479			1							1			1								0	0	0	0	0		1
WBGene00011959	T23G4.3	T23G4.3	chrIV	-1	13685049	13686988				1									1								0	0	0	1	0	1				1	1
WBGene00006450	tag-77	C28C12.10	chrIV	-1	8503480	8510498			1										1								0	0	0	0	0			1	1
WBGene00020784	tat-4	T24H7.5	chrII	-1	6234452	6244202			1										1								0	0	0	0	0
WBGene00006707	ubc-12	R09B3.4	chrI	1	11911315	11912040				1									1								1	0	0	0	0		1	1	1
WBGene00006726	ubl-5	F46F11.4	chrI	-1	5607825	5608843	CEOP1264		1										1								1	0	0	0	0				1
WBGene00010904	ugt-62	M88.1	chrIII	-1	4537245	4540605			1										1								0	0	1	0	0
WBGene00012198	W02B8.2	W02B8.2	chrII	1	13908851	13915179				1			1						1								0	0	0	0	0		1	1	1	1		1
WBGene00021071	W07B8.3	W07B8.3	chrV	1	1116328	1129353		1				1		1	1	1	1	1	1								0	0	0	0	0
WBGene00021099	W08F4.10	W08F4.10	chrII	-1	590577	591209		1											1								0	0	0	0	0			1	1
WBGene00012357	W09D6.4	W09D6.4	chrIII	1	11079693	11080274				1									1								0	0	0	0	0
WBGene00002079	xpo-2	Y48G1A.5	chrI	-1	318543	323353		1											1								1	0	0	0	0		1		1
WBGene00013729	Y111B2A.3	Y111B2A.3	chrIII	1	12495985	12499247	CEOP3764			1			1	1	1	1	1	1	1								0	0	0	0	0		1
WBGene00045366	Y17D7C.3	Y17D7C.3	chrV	-1	18720561	18723743				1									1								0	0	0	0	0
WBGene00021366	Y37E11AM.2	Y37E11AM.2	chrIV	-1	3722883	3725456	CEOP4104	1											1								0	0	0	0	0		1	1	1
WBGene00044979	Y41E3.19	Y41E3.19	chrIV	1	15056129	15057844				1									1								0	0	0	0	0
WBGene00012766	Y41E3.8	Y41E3.8	chrIV	-1	15028322	15029104				1									1								1	0	0	0	0		1	1	1
WBGene00021649	Y47G6A.25	Y47G6A.25	chrI	-1	3606413	3608348	CEOP1100		1										1								0	0	0	0	1	1				1	1
WBGene00013004	Y48E1B.5	Y48E1B.5	chrII	-1	13568012	13574993	CEOP2616			1									1								1	0	0	0	0		1	1	1
WBGene00021660	Y48G1A.4	Y48G1A.4	chrI	1	323861	330991	CEOP1968	1											1								1	0	0	0	0		1		1
WBGene00021665	Y48G1BL.6	Y48G1BL.6	chrI	-1	221064	221575		1											1								0	0	0	0	0
WBGene00021779	Y51H7C.1	Y51H7C.1	chrII	1	1467734	1469681		1					1						1								0	0	0	0	0
WBGene00013167	Y53F4B.21	Y53F4B.21	chrII	1	15090104	15108932	CEOP2660			1		1						1	1								0	0	0	0	0		1	1	1
WBGene00013213	Y54G11A.2	Y54G11A.2	chrII	1	14252280	14255564				1									1								0	0	0	0	0		1	1	1
WBGene00021884	Y54G2A.19	Y54G2A.19	chrIV	-1	2893817	2894712		1											1								0	0	0	0	0		1
WBGene00021898	Y54G2A.36	Y54G2A.36	chrIV	1	2897692	2901646		1											1								0	0	0	0	0		1
WBGene00050920	Y54H5A.5	Y54H5A.5	chrIII	1	5156395	5156847			1										1								0	0	0	0	0
WBGene00013236	Y56A3A.18	Y56A3A.18	chrIII	-1	11917384	11918621	CEOP3740			1									1								1	0	0	0	0
WBGene00022099	Y69A2AR.28	Y69A2AR.28	chrIV	-1	2612427	2613061		1											1								1	0	0	0	0			1
WBGene00194855	Y75B8A.44	Y75B8A.44	chrIII	1	12194389	12196813				1									1								0	0	0	0	0
WBGene00022563	ZC204.13	ZC204.13	chrII	-1	1660480	1660994		1											1								0	0	0	0	0
WBGene00014092	ZK822.5	ZK822.5	chrIV	1	11937380	11940632				1									1								0	0	0	0	0
WBGene00018847	marc-6	F55A3.1	chrI	1	10799612	10807716	CEOP1648		1		1	1	1	1	1	1	1	1									1	0	0	0	0
WBGene00000156	apr-1	K04G2.8	chrI	1	8050038	8055469			1		1					1		1									0	0	0	0	0
WBGene00012005	jun-1	T24H10.7	chrII	1	9113157	9132153	CEOP2709		1																		1	0	0	0	0
WBGene00003842	oct-1	F52F12.1	chrI	-1	9888348	9892214			1																		0	0	0	0	0
WBGene00003843	oct-2	ZK455.8	chrX	1	11346391	11350182			1																		0	0	0	0	0
WBGene00007063	2L52.1	2L52.1	chrII	1	1867	4663		1																			1	0	0	0	0
WBGene00007064	2RSSE.1	2RSSE.1	chrII	1	15268136	15273238				1	1	1	1	1	1	1	1	1									0	0	0	0	0
WBGene00044165	2RSSE.2	2RSSE.2	chrII	1	15274315	15275613				1	1	1	1	1	1	1	1	1									0	0	1	0	0
WBGene00007067	4R79.2	4R79.2	chrIV	-1	17480360	17483294				1																	0	0	0	0	0
WBGene00007069	6R55.2	6R55.2	chrX	1	17714380	17714756			1																		0	0	0	0	0
WBGene00017071	aagr-1	D2096.3	chrIV	1	8366526	8375359			1																		0	0	0	0	0
WBGene00019895	aagr-2	R05F9.12	chrII	-1	4914489	4925242			1																		0	0	0	0	0
WBGene00009583	aagr-3	F40F9.6	chrV	-1	9725922	9729485			1																		1	0	0	0	0			1	1
WBGene00018682	aagr-4	F52D1.1	chrX	1	460652	466973		1				1		1			1	1									0	0	0	0	0
WBGene00019801	aak-1	PAR2.3	chrIII	-1	8756906	8761009			1																		0	0	0	0	0
WBGene00020142	aak-2	T01C8.1	chrX	1	16796014	16803299			1																		1	0	0	0	0
WBGene00010115	aakb-1	F55F3.1	chrX	1	13755701	13759323			1																		0	0	0	0	0
WBGene00012928	aakb-2	Y47D3A.15	chrIII	1	11237050	11238033				1																	0	0	0	0	0				1
WBGene00013732	aakg-1	Y111B2A.8	chrIII	-1	12538779	12547980				1	1	1	1	1	1	1	1	1									0	0	0	0	0
WBGene00020633	aakg-2	T20F7.6	chrX	-1	16865995	16868960			1																		0	0	0	0	0
WBGene00021527	aakg-3	Y41G9A.3	chrX	1	2976463	2980998			1					1													0	0	0	0	0
WBGene00020135	aakg-4	T01B6.3	chrX	-1	2314910	2319325			1					1													0	0	0	0	0
WBGene00011276	aakg-5	R53.7	chrII	-1	9970994	9974987	CEOP2734		1																		0	0	0	1	0
WBGene00000001	aap-1	Y110A7A.10	chrI	1	5107844	5110167	CEOP1906		1																		0	0	0	0	0
WBGene00000196	aars-1	W02B12.6	chrII	-1	11460099	11464015			1																		0	0	0	0	0
WBGene00000197	aars-2	F28H1.3	chrI	1	3983174	3986918			1																		1	0	0	0	0			1
WBGene00000002	aat-1	F27C8.1	chrIV	-1	9598960	9601678			1																		0	0	1	0	0
WBGene00000003	aat-2	F07C3.7	chrV	-1	9244379	9246337			1																		0	0	0	0	0
WBGene00000004	aat-3	F52H2.2	chrX	1	2554222	2557718			1																		1	0	0	0	0
WBGene00000005	aat-4	T13A10.10	chrIV	-1	6272543	6275702			1																		0	0	0	0	0
WBGene00000006	aat-5	C55C2.5	chrI	-1	2571778	2576024		1					1														0	0	0	0	0
WBGene00000007	aat-6	T11F9.4	chrV	-1	11466824	11470645			1																		0	0	0	0	0
WBGene00000008	aat-7	F54D12.3	chrII	1	1386895	1391574		1			1	1	1	1	1	1	1	1									0	0	0	0	0
WBGene00000009	aat-8	F28F9.4	chrIV	-1	3862123	3865024		1																			0	0	0	0	0
WBGene00000010	aat-9	Y53H1C.1	chrI	-1	11388738	11396651	CEOP1950			1	1	1	1	1	1	1	1	1									0	0	0	0	0		1
WBGene00012714	abce-1	Y39E4B.1	chrIII	1	13153474	13160189				1	1	1	1	1	1	1	1	1									0	0	0	0	0			1	1
WBGene00006512	abcf-1	F18E2.2	chrV	-1	12761024	12763358			1																		1	0	0	0	0			1
WBGene00012097	abcf-2	T27E9.7	chrIII	-1	13457573	13462137	CEOP3792			1																	1	0	0	0	0				1
WBGene00018339	abcf-3	F42A10.1	chrIII	1	6173253	6176120			1																		0	0	0	0	0
WBGene00016973	abch-1	C56E6.5	chrII	-1	6528583	6531578			1																		0	0	0	0	0
WBGene00006522	abcx-1	C56E6.1	chrII	1	6532131	6535333			1																		0	0	0	0	0
WBGene00000012	abf-1	C50F2.9	chrI	-1	3886114	3887083	CEOP1951		1																		0	0	0	0	0
WBGene00000013	abf-2	C50F2.10	chrI	-1	3885551	3885964	CEOP1951		1																		0	0	0	0	0
WBGene00000014	abf-3	F54B8.5	chrV	-1	15817391	15817827				1																	0	0	0	0	0
WBGene00000015	abf-4	Y38H6C.22	chrV	-1	20557914	20558348				1																	0	0	0	0	0
WBGene00000016	abf-5	T22H6.5	chrX	1	12792779	12793316			1																		0	0	0	0	0
WBGene00000017	abf-6	T22H6.7	chrX	1	12794107	12794803			1																		0	0	0	0	0
WBGene00015146	abi-1	B0336.6	chrIII	-1	5690062	5692695			1																		1	0	0	0	0
WBGene00000018	abl-1	M79.1	chrX	-1	10605769	10624122			1					1													0	0	1	0	0
WBGene00000019	abt-1	C24F3.5	chrIV	-1	10206171	10214889	CEOP4364		1				1				1	1									0	0	0	0	0
WBGene00000020	abt-2	F12B6.1	chrI	-1	2255925	2272868		1			1	1	1	1	1	1	1	1									0	0	0	0	0
WBGene00000021	abt-3	F55G11.9	chrIV	-1	12950293	12957104				1																	0	0	0	0	0
WBGene00000022	abt-4	Y39D8C.1	chrV	-1	323778	330728		1									1										0	0	0	0	0						1
WBGene00000023	abt-5	Y53C10A.9	chrI	1	12011267	12018659				1				1													0	0	0	0	0
WBGene00018982	abt-6	F56F4.6	chrI	-1	6139218	6140446			1																		0	0	0	0	0
WBGene00022281	abtm-1	Y74C10AR.3	chrI	-1	2472072	2485384	CEOP1920	1			1	1	1	1	1	1	1	1									1	0	0	0	0		1	1	1
WBGene00009920	abts-1	F52B5.1	chrI	-1	8296910	8307559			1																		1	0	0	0	0
WBGene00009929	abts-2	F52D10.1	chrX	1	11585608	11589655			1																		0	0	0	0	0
WBGene00019018	abts-3	F57F10.1	chrII	1	6136065	6157147			1																		0	0	0	0	0
WBGene00019844	abts-4	R03E9.3	chrX	-1	6747267	6761699			1																		0	0	0	0	0
WBGene00000024	abu-1	AC3.3	chrV	-1	10380316	10381800			1																		0	0	0	0	0						1
WBGene00000033	abu-10	F35A5.3	chrX	1	3798163	3799725			1				1	1													0	0	0	0	0						1
WBGene00000034	abu-11	T01D1.6	chrII	-1	192531	194558		1																			0	0	0	0	0						1
WBGene00000025	abu-2	F19G12.7	chrX	-1	1408831	1410647		1				1	1	1	1	1	1	1									0	0	0	0	0						1
WBGene00000026	abu-3	F31A3.1	chrX	1	17553344	17554374			1																		0	0	0	0	0
WBGene00000027	abu-4	Y5H2A.3	chrV	1	2274881	2275976		1																			0	0	0	0	0
WBGene00000028	abu-5	Y105C5A.4	chrIV	1	15590665	15591740				1																	0	0	0	0	0
WBGene00000029	abu-6	C03A7.7	chrV	-1	5160587	5161877			1																		0	0	0	0	0						1
WBGene00000030	abu-7	C03A7.8	chrV	-1	5163380	5164743			1																		0	0	0	0	0						1
WBGene00000031	abu-8	C03A7.14	chrV	-1	5192977	5194592			1			1		1			1										0	0	0	0	0						1
WBGene00000032	abu-9	R09F10.2	chrX	1	8322059	8323291			1					1													0	0	0	0	0
WBGene00077502	AC3.11	AC3.11	chrV	-1	10376962	10377294			1																		0	0	0	0	0
WBGene00077503	AC3.12	AC3.12	chrV	-1	10378963	10379268			1																		0	0	0	0	0
WBGene00077504	AC3.13	AC3.13	chrV	-1	10379894	10380222			1																		0	0	0	0	0
WBGene00007071	AC3.5	AC3.5	chrV	1	10388447	10393480			1																		0	0	0	0	0
WBGene00044022	AC3.9	AC3.9	chrV	1	10374828	10376861			1																		0	0	0	0	0
WBGene00014997	AC7.3	AC7.3	chrIV	1	5111678	5112867			1																		0	0	0	0	0
WBGene00043988	AC8.10	AC8.10	chrX	-1	237496	239177		1						1													0	0	0	0	0
WBGene00043989	AC8.11	AC8.11	chrX	-1	236067	236810		1																			0	0	0	0	0
WBGene00043990	AC8.12	AC8.12	chrX	1	239849	240779		1																			0	0	0	0	0
WBGene00007074	AC8.2	AC8.2	chrX	1	248343	249802		1					1	1	1	1	1	1									0	0	0	0	0
WBGene00007075	AC8.3	AC8.3	chrX	-1	228080	229761		1																			0	0	0	0	0
WBGene00007076	AC8.4	AC8.4	chrX	-1	226651	227394		1																			0	0	0	0	0
WBGene00007077	AC8.5	AC8.5	chrX	1	221017	225084		1			1		1				1										0	0	0	0	0
WBGene00007079	AC8.7	AC8.7	chrX	1	230433	231363		1																			0	0	0	0	0
WBGene00043987	AC8.9	AC8.9	chrX	-1	232875	233777		1																			0	0	0	0	0
WBGene00016655	acbp-1	C44E4.6	chrI	-1	4635716	4637329	CEOP1196		1			1					1										0	0	0	0	0
WBGene00009818	acbp-3	F47B10.7	chrX	1	10903213	10905085			1																		0	0	1	0	0
WBGene00018949	acbp-4	F56C9.5	chrIII	-1	7308290	7308826			1																		0	0	0	0	0
WBGene00011731	acbp-5	T12D8.3	chrIII	-1	13639526	13641589	CEOP3818			1																	0	0	0	0	0
WBGene00012457	acbp-6	Y17G7B.1	chrII	-1	11972248	11973627			1		1	1	1	1	1	1	1	1									0	0	0	0	0		1
WBGene00044603	acbp-7	F26A1.15	chrIII	1	4837699	4840988			1																		0	0	0	0	0
WBGene00010275	acc-1	F58G6.4	chrIV	1	9658036	9663924			1																		0	0	0	0	0
WBGene00008280	acc-2	C53D6.3	chrIV	1	9016773	9019086			1																		0	0	0	0	0
WBGene00018880	acc-3	F55D10.5	chrX	-1	4722981	4727451			1																		0	0	0	0	0
WBGene00012099	acc-4	T27E9.9	chrIII	-1	13480659	13484054				1	1	1	1	1	1	1	1	1									0	0	0	0	0
WBGene00016064	acd-1	C24G7.2	chrI	1	4103715	4108047			1																		0	0	0	0	0
WBGene00016943	acdh-1	C55B7.4	chrI	1	6497440	6499561			1																		0	0	0	0	0					1
WBGene00012860	acdh-11	Y45F3A.3	chrIII	1	10566100	10571507	CEOP3680		1		1	1			1	1	1	1									1	0	0	0	0
WBGene00001566	acdh-13	C28C12.9	chrIV	-1	8496470	8498858	CEOP4292		1																		0	0	0	0	0			1
WBGene00015894	acdh-2	C17C3.12	chrII	-1	5544762	5547473			1																		0	0	0	0	0
WBGene00020419	acdh-4	T10E9.9	chrI	-1	6546678	6548591	CEOP1952		1																		0	0	0	0	0
WBGene00016491	acdh-5	C37A2.3	chrI	1	6784882	6787140			1																		0	0	0	0	0
WBGene00015335	acdh-6	C02D5.1	chrIII	1	8561105	8562892			1																		0	0	0	0	0
WBGene00020812	acdh-7	T25G12.5	chrX	-1	17214944	17217033	CEOPX144		1							1		1									1	0	0	0	0
WBGene00019406	acdh-8	K05F1.3	chrII	1	5794487	5796254			1																		0	0	0	0	0
WBGene00017874	acdh-9	F28A10.6	chrII	-1	846855	848609		1																			1	0	0	0	0
WBGene00000035	ace-1	W09B12.1	chrX	1	16367157	16373965			1																		0	0	0	0	0
WBGene00000036	ace-2	Y44E3A.2	chrI	-1	3301518	3307467		1							1		1										0	0	0	0	0
WBGene00016601	acin-1	C43E11.1	chrI	1	4270647	4273336			1																		0	0	0	0	0			1
WBGene00017888	acl-11	F28B3.9	chrI	1	4929100	4932148	CEOP1927		1																		0	0	0	0	0
WBGene00015295	acl-12	C01C10.3	chrX	-1	7439354	7442534			1																		1	0	0	0	0
WBGene00008581	acl-13	F08G5.2	chrIV	1	12410480	12412197				1																	0	0	0	0	0
WBGene00019465	acl-14	K07B1.5	chrV	-1	9327135	9333040			1																		1	0	0	0	0
WBGene00011543	acl-2	T06E8.1	chrV	-1	10028123	10031069			1																		1	0	0	0	0			1
WBGene00006491	acl-3	ZK809.2	chrIV	-1	11650695	11652010				1																	0	0	0	1	0
WBGene00018657	acl-4	F49H12.6	chrX	-1	2066550	2070454			1																		1	0	0	0	0					1	1
WBGene00011106	acl-5	R07E3.5	chrX	-1	10324123	10327396			1																		1	0	0	0	0
WBGene00017261	acl-6	F08F3.2	chrV	1	5433369	5437050			1																		0	0	0	1	0			1	1
WBGene00012911	acl-7	Y46G5A.21	chrII	-1	12811591	12816394				1	1	1					1	1									1	0	0	0	0
WBGene00020264	acl-8	T05H4.1	chrV	1	6450881	6452214	CEOP5116		1																		0	0	0	0	0
WBGene00022646	acl-9	ZK40.1	chrV	1	6453179	6454959	CEOP5116		1																		0	0	0	0	0
WBGene00000039	acn-1	C42D8.5	chrX	-1	5092250	5097042			1																		0	0	0	0	0
WBGene00000040	aco-1	ZK455.1	chrX	1	11339808	11343504			1																		0	0	1	0	0
WBGene00000041	aco-2	F54H12.1	chrIII	1	7973652	7977260			1																		1	0	0	0	0					1
WBGene00008564	acox-1	F08A8.1	chrI	1	12938544	12942212				1																	0	0	0	0	0
WBGene00022770	acp-1	ZK563.6	chrX	-1	3382855	3385533			1																		0	0	0	0	0
WBGene00008802	acp-2	F14E5.4	chrII	-1	8429939	8432003			1																		0	0	0	0	0
WBGene00008801	acp-3	F14E5.3	chrII	-1	8435296	8437118			1																		0	0	0	0	0
WBGene00008804	acp-4	F14E5.6	chrII	-1	8432722	8435054			1																		0	0	0	0	0
WBGene00017427	acp-5	F13D11.1	chrX	1	5829375	5831992			1																		0	0	0	0	0
WBGene00022245	acp-6	Y73B6BL.24	chrIV	-1	6424587	6426130			1																		1	0	0	0	0
WBGene00022246	acp-7	Y73B6BL.25	chrIV	-1	6428390	6431682			1																		0	0	0	0	0
WBGene00000049	acr-10	R02E12.8	chrX	1	4023291	4025561			1																		0	0	0	0	0
WBGene00000050	acr-11	D2092.3	chrI	-1	6621629	6624895			1																		0	0	0	0	0
WBGene00000051	acr-12	R01E6.4	chrX	1	13532851	13536324			1																		0	0	0	0	0
WBGene00000053	acr-14	T05C12.2	chrII	-1	8174793	8177143			1																		0	0	0	0	0
WBGene00000054	acr-15	F25G6.4	chrV	1	8552673	8555366			1																		0	0	0	0	0
WBGene00000055	acr-16	F25G6.3	chrV	1	8561194	8564298			1																		0	0	0	0	0
WBGene00000056	acr-17	F53E10.2	chrV	1	2608654	2615245		1			1	1	1	1	1	1	1	1									0	0	0	0	0					1
WBGene00000057	acr-18	F28F8.1	chrV	-1	15551136	15559128				1	1	1	1	1	1	1	1	1									0	0	0	0	0		1
WBGene00000058	acr-19	C31H5.3	chrI	-1	9031267	9036688			1																		0	0	0	0	0
WBGene00000042	acr-2	K11G12.2	chrX	1	6702653	6709263	CEOPX158		1			1	1	1	1			1									0	0	0	0	0
WBGene00000059	acr-20	R06A4.10	chrII	-1	14373755	14377814				1							1										0	0	0	0	0
WBGene00000060	acr-21	F27B3.2	chrIII	1	6583458	6585564			1																		0	0	0	0	0
WBGene00000062	acr-23	F59B1.9	chrV	-1	3651647	3659486		1			1	1	1	1	1	1	1	1									0	0	0	0	0
WBGene00013534	acr-24	Y73F8A.30	chrIV	1	15497535	15510443				1																	0	0	0	0	0
WBGene00043066	acr-25	Y73B6BL.42	chrIV	1	6464341	6468316			1																		0	0	0	0	0
WBGene00000043	acr-3	K11G12.7	chrX	1	6709499	6712887	CEOPX158		1																		0	0	0	0	0
WBGene00000044	acr-5	K03F8.2	chrIII	-1	6509646	6514715			1																		0	0	0	0	0					1
WBGene00000045	acr-6	ZK973.5	chrI	1	4359117	4362549			1																		0	0	0	0	0
WBGene00000046	acr-7	T09A5.3	chrII	-1	7845610	7849745			1																		0	0	0	0	0
WBGene00000047	acr-8	ZC504.2	chrX	1	10412703	10416596			1																		0	0	0	0	0
WBGene00000048	acr-9	C40C9.2	chrX	-1	13642278	13646828			1																		0	0	0	0	0
WBGene00018488	acs-1	F46E10.1	chrV	1	6524972	6532074			1																		0	0	0	0	0
WBGene00007082	acs-10	AH10.1	chrV	1	14146494	14148769			1		1	1	1	1	1	1	1	1									0	0	0	0	0
WBGene00018269	acs-11	F41C3.3	chrII	1	4742124	4745277	CEOP2703		1																		0	0	0	0	0
WBGene00009106	acs-12	F25C8.4	chrV	1	20903946	20907401				1																	0	0	0	0	0
WBGene00008669	acs-14	F11A3.1	chrV	1	9508073	9510407			1																		0	0	0	0	0
WBGene00019920	acs-15	R07C3.4	chrII	1	933044	936933		1																			0	0	0	0	0
WBGene00018579	acs-16	F47G6.2	chrI	1	1471299	1479926		1			1	1	1	1	1	1	1	1									0	0	0	0	0
WBGene00016716	acs-17	C46F4.2	chrX	-1	5937530	5942160			1																		0	0	1	0	0
WBGene00011173	acs-18	R09E10.3	chrIV	-1	10310769	10313648			1																		0	0	0	0	0
WBGene00009221	acs-2	F28F8.2	chrV	1	15567373	15569870				1			1														0	0	0	0	0
WBGene00009218	acs-20	F28D1.9	chrIV	-1	12392091	12398682				1																	0	0	0	0	0
WBGene00016849	acs-21	C50H11.1	chrV	1	3089072	3091349		1																			0	0	0	0	0
WBGene00017012	acs-22	D1009.1	chrX	1	8931187	8939207			1					1													0	0	1	0	0
WBGene00020343	acs-3	T08B1.6	chrV	1	1969540	1974514		1			1	1	1	1	1	1	1	1									0	0	0	0	0
WBGene00018152	acs-4	F37C12.7	chrIII	1	7167776	7170941			1																		1	0	0	0	0
WBGene00013575	acs-5	Y76A2B.3	chrIII	-1	13540037	13543433				1																	0	0	1	0	0
WBGene00022849	acs-6	ZK1127.2	chrII	1	7061960	7064737			1																		0	0	0	0	0
[truncated: 19,601 more rows]
