# Supplementary material
Source: publisher figshare collection journal article supplement (https://gsajournals.figshare.com/articles/dataset/_/7823846)
Supplement: Supplementary file 2 [file 1]

Figure S3

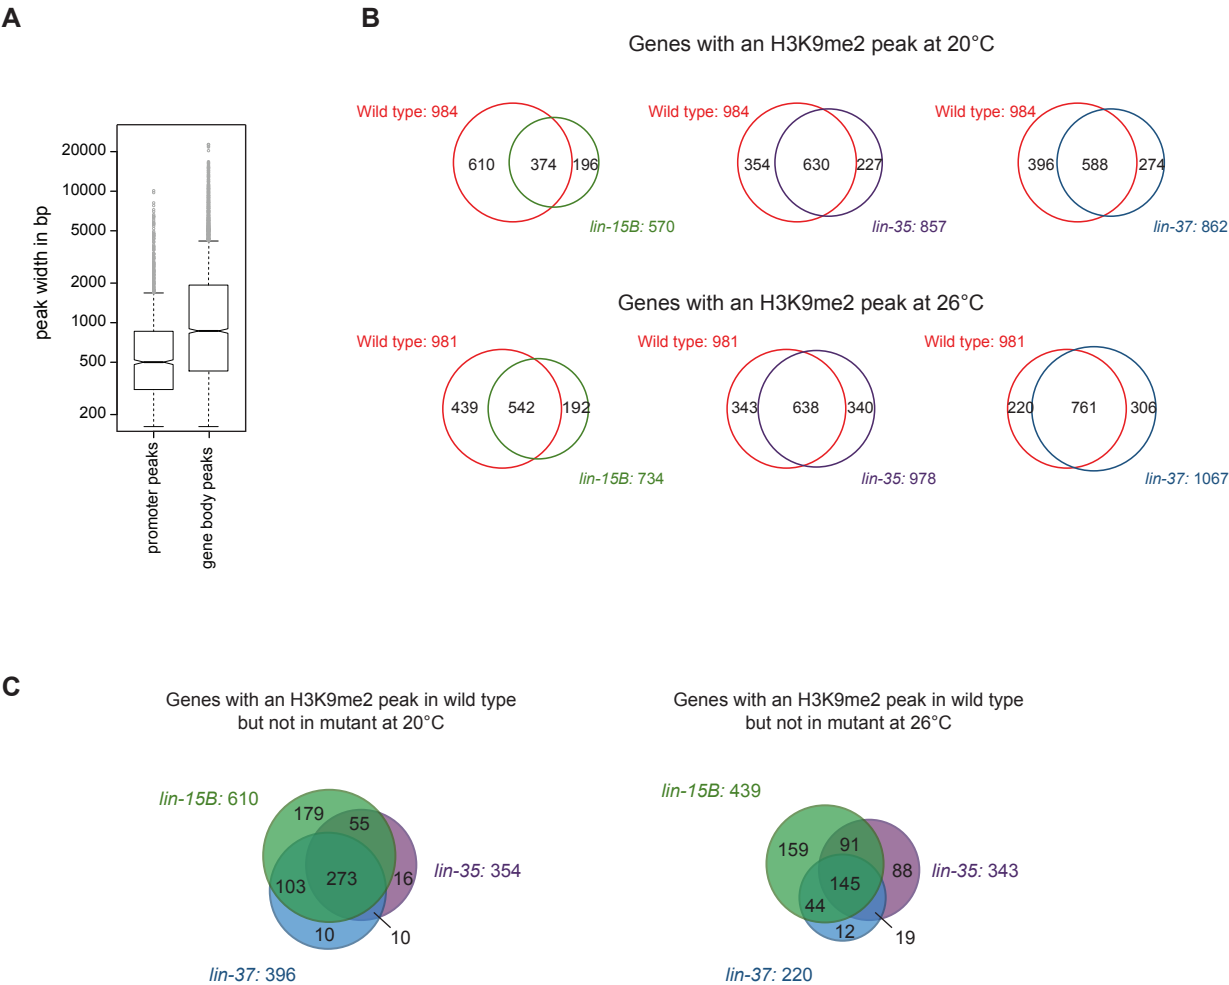

**Figure S3: Overlaps of genes with called H3K9me2 promoter peaks amongst different genotypes.** (A) Boxplot of peak widths of H3K9me2 promoter peaks and gene body peaks in wild type at 20°C. (B) Venn diagrams of genes with a called H3K9me2 promoter peak in wild type and each mutant at either 20°C or 26°C. (C) Venn diagrams of genes that lost a called H3K9me2 promoter peak in each mutant at either 20°C or 26°C.
