# Supplementary material
Source: publisher figshare collection journal article supplement (https://gsajournals.figshare.com/articles/dataset/_/7823846)
Supplement: Supplementary file 5 [file 1]

Figure S5

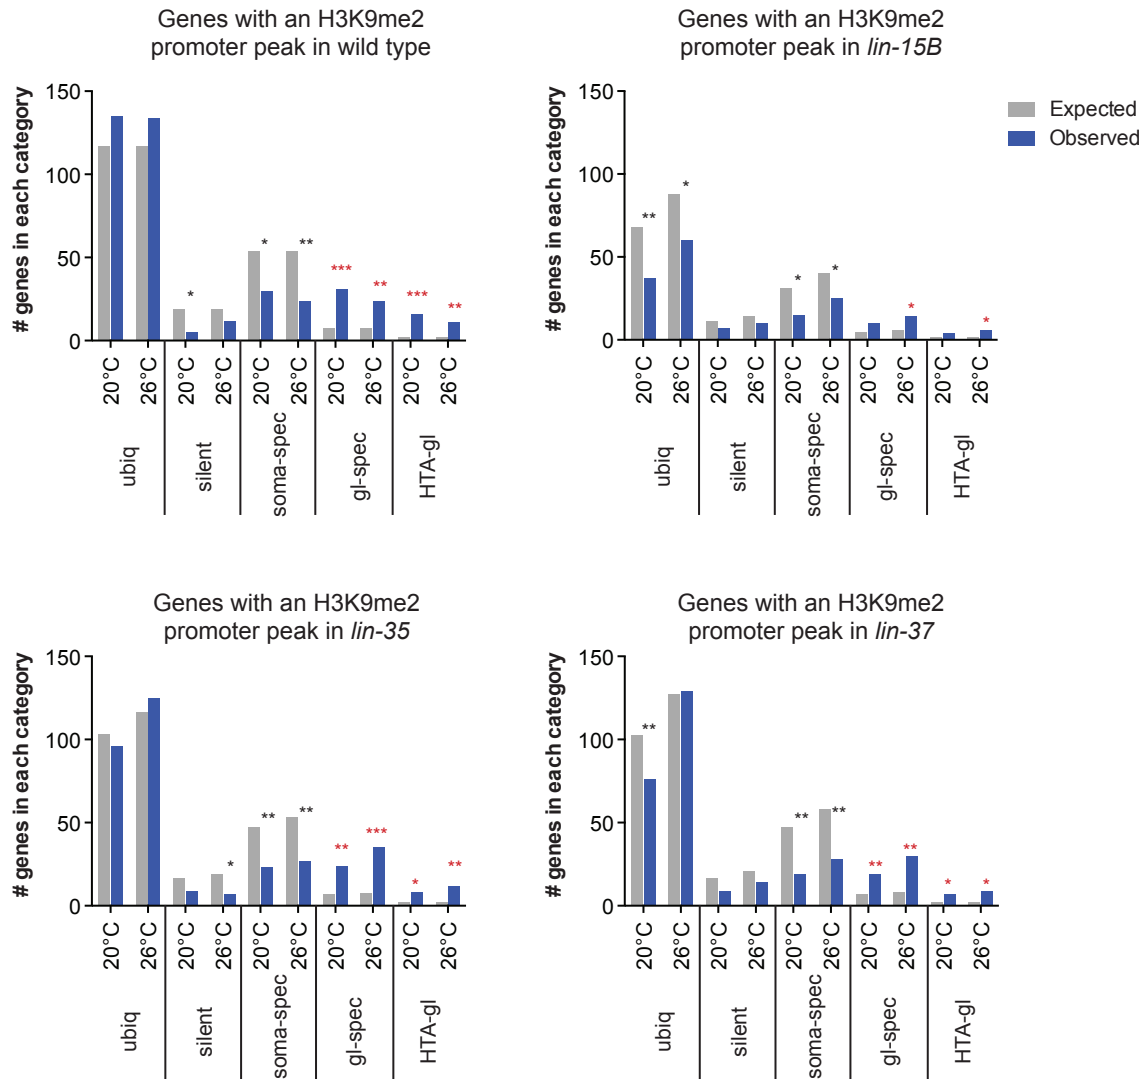

**Figure S5: Enrichment analysis of genes with a called H3K9me2 promoter peaks for different categories of expression.** Enrichment analysis of genes with an H3K9me2 promoter peak expected and observed among genes that show ubiquitous, silent, soma-specific, germline-specific, or HTA-germline expression. Significant over-enrichment (red) or under-enrichment (black) was determined by the hypergeometric test (\*p-value < 0.01, \*\*p-value < 1x10<sup>-5</sup>, \*\*\*p-value < 1x10<sup>-10</sup>).
