# Supplementary material
Source: publisher figshare collection journal article supplement (https://gsajournals.figshare.com/articles/dataset/_/7823846)
Supplement: Supplementary file 8 [file 1]

Figure S6

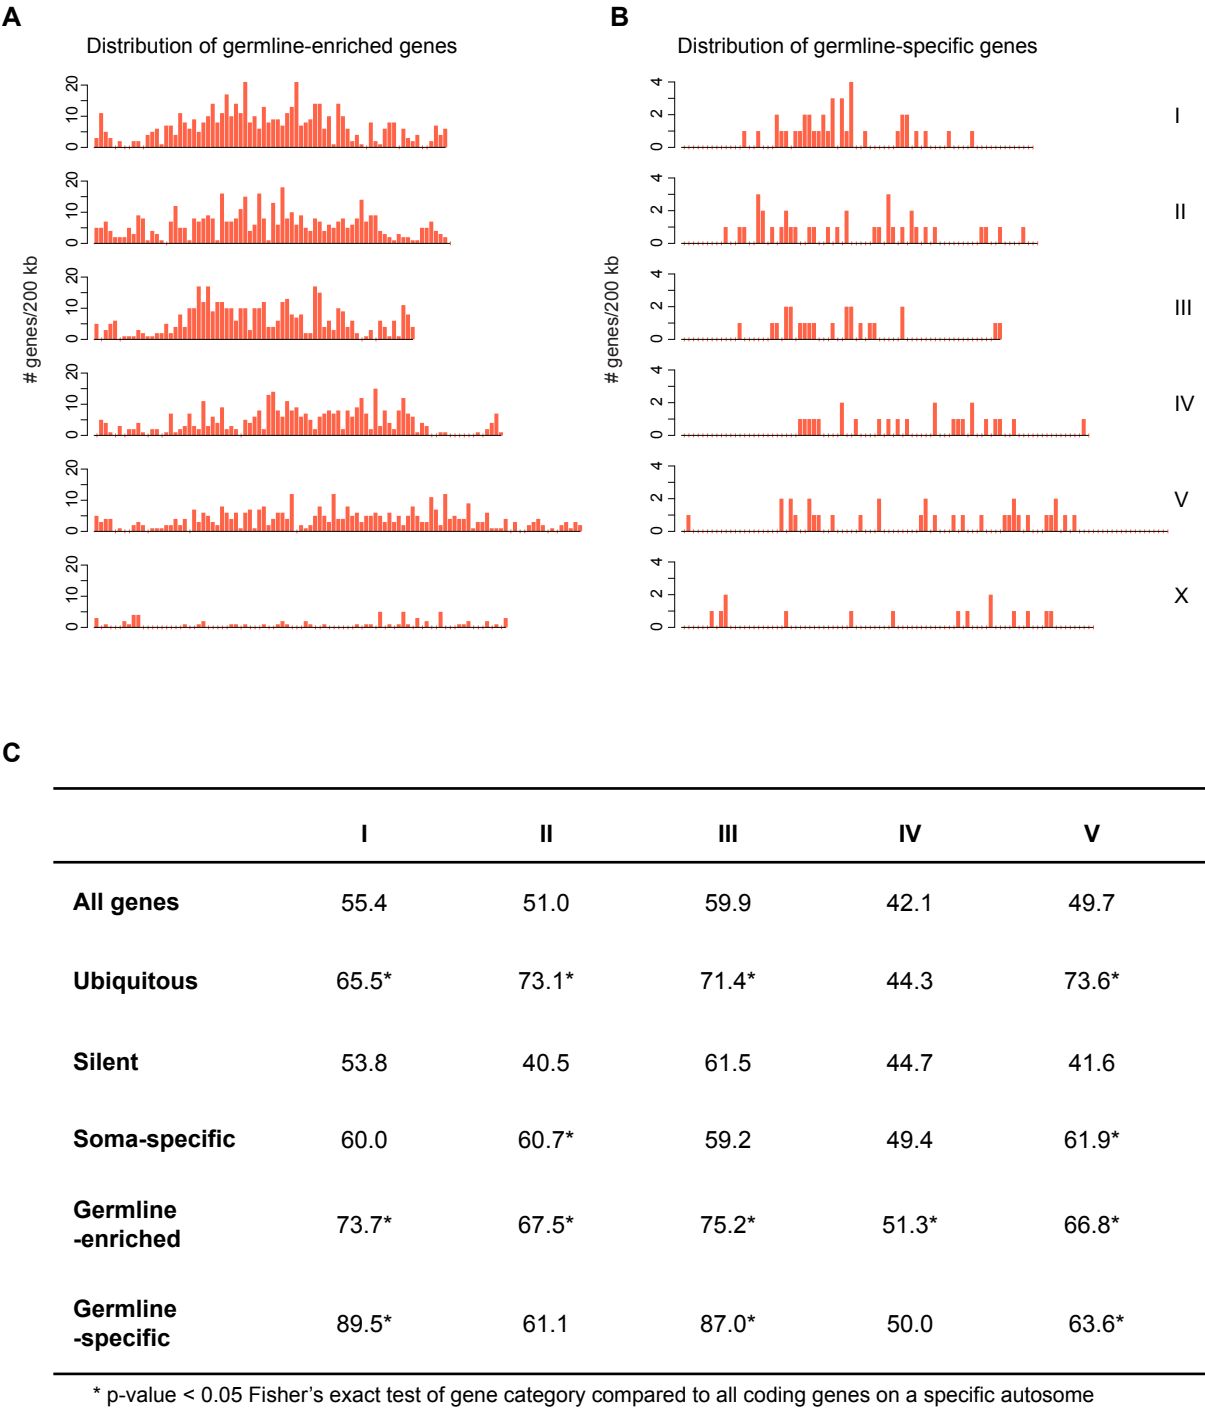

**Figure S6: Chromosomal distribution of genes with germline expression.** (A, B) Binned distribution of genes that show germline-enriched (A) and germline-specific (B) expression in 200 kb windows across the five autosomes and the X chromosome. (C) The percentage of genes in different categories of expression found in the centers of autosomes. Significant enrichment was determined by Fisher's exact test between the number of genes of a given category in the center vs. arms of each autosome compared to all genes in the center vs. arms of the same autosome (\*p-value < 0.05, Fisher's Exact test).
