# Supplementary material
Source: publisher figshare collection journal article supplement (https://gsajournals.figshare.com/articles/dataset/_/7823846)
Supplement: Supplementary file 9 [file 1]

**Table S2: Exact p-values for Chi-squared test with the Yates correction for comparing the number of genes between genotypes with called H3K3me2 gene body peaks**

|                                    |                        | Genes with H3K9me2 gene body peaks |                        |                       |                       |            |                        |                       |                       |
|------------------------------------|------------------------|------------------------------------|------------------------|-----------------------|-----------------------|------------|------------------------|-----------------------|-----------------------|
|                                    |                        | N2<br>20°C                         | <i>lin-15B</i><br>20°C | <i>lin-35</i><br>20°C | <i>lin-37</i><br>20°C | N2<br>26°C | <i>lin-15B</i><br>26°C | <i>lin-35</i><br>26°C | <i>lin-37</i><br>26°C |
| Genes with H3K9me2 gene body peaks | N2 20°C                | NA                                 | < 0.0001               | ns                    | ns                    | ns         | ns                     | ns                    | ns                    |
|                                    | <i>lin-15B</i><br>20°C |                                    | NA                     | < 0.0001              | < 0.0001              | 0.0003     | < 0.0001               | < 0.0001              | < 0.0001              |
|                                    | <i>lin-35</i><br>20°C  |                                    |                        | NA                    | ns                    | ns         | ns                     | ns                    | ns                    |
|                                    | <i>lin-37</i><br>20°C  |                                    |                        |                       | NA                    | ns         | ns                     | ns                    | ns                    |
|                                    | N2<br>26°C             |                                    |                        |                       |                       | NA         | ns                     | ns                    | ns                    |
|                                    | <i>lin-15B</i><br>26°C |                                    |                        |                       |                       |            | NA                     | ns                    | ns                    |
|                                    | <i>lin-35</i><br>26°C  |                                    |                        |                       |                       |            |                        | NA                    | ns                    |
|                                    | <i>lin-37</i><br>26°C  |                                    |                        |                       |                       |            |                        |                       | NA                    |

Significance cut-off of p-value  $\leq 0.01$
