# Supplementary material
Source: publisher figshare collection journal article supplement (https://gsajournals.figshare.com/articles/dataset/_/7823846)
Supplement: Supplementary file 12 [file 1]

Figure S4

A

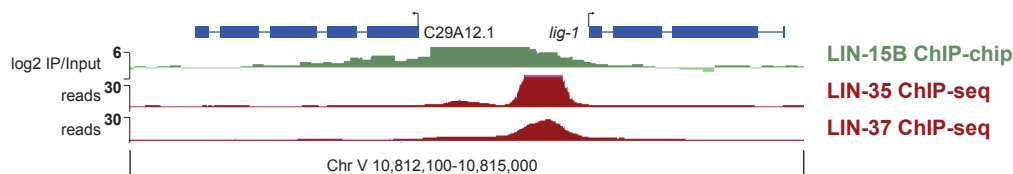

B

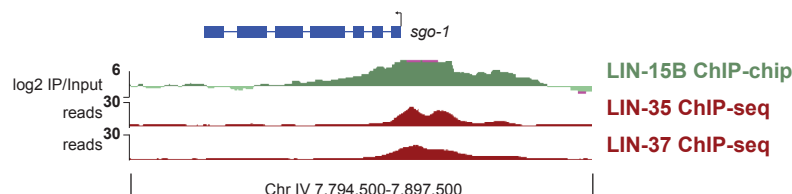

C

Genes with LIN-15B ChIP-chip peak: 2146

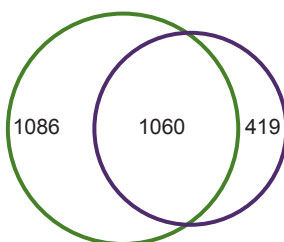

Genes with DREAM ChIP-seq peak: 1479

D

LIN-15B targets: 115

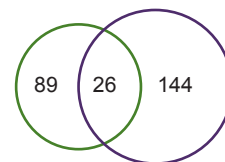

DREAM targets: 170

**Figure S4: Overlap of LIN-15B and DREAM complex binding at gene promoters.** (A, B) LIN-15B (green), LIN-35 (red), and LIN-37 (red) ChIP data visualized on the UCSC genome browser at the bi-directional genes *C29A12.1* and *lig-1* (A) and the *sgo-1* gene (B) showing all three proteins at the gene promoters. The vertical lines and arrows indicate the location of the transcript start site (TSS) and the direction of transcription. Signals shown are LIN-15B ChIP-chip z-scored log2 fold changes IP/Input and LIN-35 and LIN-37 ChIP-seq (see Materials and Methods). Note that the broader LIN-15B peaks are at least partially expected due to the different ChIP technologies (ChIP-seq generally has more dynamic range than microarray-based ChIP-chip) and the log transformation of the ChIP-chip ratios. (C) Venn diagram of genes with a called LIN-15B promoter peak and DREAM promoter peak (Goetsch *et al.* 2017). (D) Venn diagram of genes defined as LIN-15B targets and DREAM complex targets.
