# Supplementary material
Source: publisher figshare collection journal article supplement (https://gsajournals.figshare.com/articles/dataset/_/7823846)
Supplement: Supplementary file 13 [file 1]

Figure S7

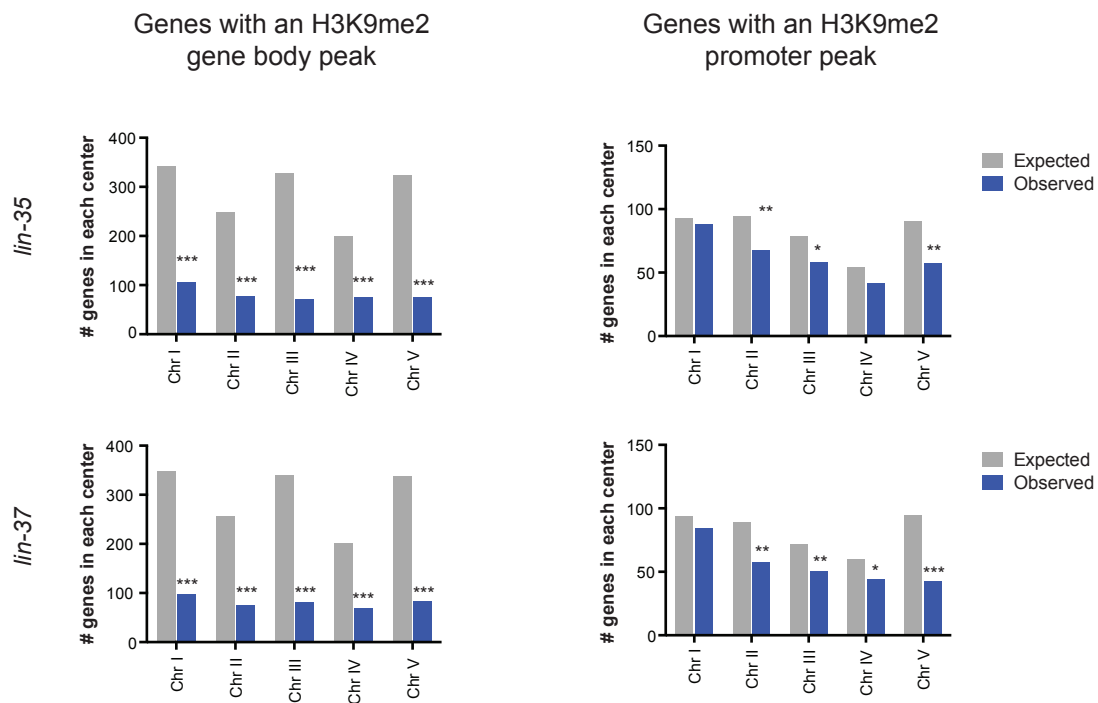

**Figure S7: Chromosomal distribution of genes with an H3K9me2 gene body peak or promoter peak in *lin-35* and *lin-37* mutants.** Enrichment analysis of genes with an H3K9me2 gene-body peak or promoter peak expected by chance and observed in chromosome centers in *lin-35* and *lin-37* mutant L1s at 20°C. The expected number is based on the percentage of coding genes in the center versus arm regions of each chromosome; the observed number is the number of genes in the chromosome centers. The locations of chromosome arm and center boundaries are from (Liu *et al.* 2010). Significant under-enrichment (black) was determined by the hypergeometric test (\*p-value < 0.01, \*\*p-value < 1x10<sup>-5</sup>, \*\*\*p-value < 1x10<sup>-10</sup>).
